# Supplementary material for: Generation of human hepatic progenitor cells with regenerative and metabolic capacities from primary hepatocytes
Source: eLife. 2019 Aug 8;8:e47313. doi: 10.7554/eLife.47313 (PMC6731094; doi:10.7554/eLife.47313)
Supplement: Supplementary file 1. [file elife-47313-supp1.xlsx]

## Sheet: Sheet1
Supplementary file 1. All the gene sets enriched in FAC cells compared with FBS cells at D14 of culture (assessed by GSEA)
NAME	Data base	NOM p-val	FDR q-val	FWER p-val
HALLMARK_OXIDATIVE_PHOSPHORYLATION	HALLMARK	0	0.0332978	0.021
HALLMARK_FATTY_ACID_METABOLISM	HALLMARK	0.0019685	0.0555114	0.08
HALLMARK_MYC_TARGETS_V1	HALLMARK	0.0324544	0.101372	0.176
HALLMARK_PANCREAS_BETA_CELLS	HALLMARK	0.0372549	0.340671	0.74
HALLMARK_MYC_TARGETS_V2	HALLMARK	0.0468432	0.147616	0.336
HALLMARK_INTERFERON_ALPHA_RESPONSE	HALLMARK	0.0589391	0.177945	0.324
HALLMARK_GLYCOLYSIS	HALLMARK	0.0685484	0.27988	0.828
HALLMARK_INTERFERON_GAMMA_RESPONSE	HALLMARK	0.0991903	0.31134	0.751
HALLMARK_CHOLESTEROL_HOMEOSTASIS	HALLMARK	0.12253	0.277036	0.782
HALLMARK_ESTROGEN_RESPONSE_LATE	HALLMARK	0.130522	0.273356	0.868
HALLMARK_PEROXISOME	HALLMARK	0.139216	0.368021	0.667
HALLMARK_REACTIVE_OXIGEN_SPECIES_PATHWAY	HALLMARK	0.150313	0.35984	0.715
HALLMARK_BILE_ACID_METABOLISM	HALLMARK	0.163386	0.282816	0.818
HALLMARK_ADIPOGENESIS	HALLMARK	0.18	0.285985	0.859
HALLMARK_UV_RESPONSE_UP	HALLMARK	0.22549	0.343186	0.965
HALLMARK_E2F_TARGETS	HALLMARK	0.229675	0.299831	0.774
HALLMARK_PI3K_AKT_MTOR_SIGNALING	HALLMARK	0.230924	0.320931	0.968
HALLMARK_XENOBIOTIC_METABOLISM	HALLMARK	0.253308	0.29413	0.889
HALLMARK_DNA_REPAIR	HALLMARK	0.266145	0.322702	0.93
HALLMARK_MTORC1_SIGNALING	HALLMARK	0.280335	0.328922	0.951
HALLMARK_G2M_CHECKPOINT	HALLMARK	0.391393	0.334538	0.968
HALLMARK_IL6_JAK_STAT3_SIGNALING	HALLMARK	0.446247	0.489457	0.995
HALLMARK_PROTEIN_SECRETION	HALLMARK	0.532359	0.562135	0.996
HALLMARK_SPERMATOGENESIS	HALLMARK	0.547893	0.568492	0.996
KEGG_MATURITY_ONSET_DIABETES_OF_THE_YOUNG	KEGG	0	0.421141	0.314
KEGG_GLYCOSPHINGOLIPID_BIOSYNTHESIS_LACTO_AND_NEOLACTO_SERIES	KEGG	0	0.0939044	0.581
KEGG_RIBOSOME	KEGG	0	0.101314	0.708
KEGG_GLUTATHIONE_METABOLISM	KEGG	0.002	0.160224	0.386
KEGG_FRUCTOSE_AND_MANNOSE_METABOLISM	KEGG	0.00411523	0.180385	0.331
KEGG_TYROSINE_METABOLISM	KEGG	0.00609756	0.218383	0.322
KEGG_PENTOSE_AND_GLUCURONATE_INTERCONVERSIONS	KEGG	0.00610998	0.107803	0.455
KEGG_ASCORBATE_AND_ALDARATE_METABOLISM	KEGG	0.00814664	0.177436	0.372
KEGG_PHENYLALANINE_METABOLISM	KEGG	0.0101215	0.282405	0.317
KEGG_HISTIDINE_METABOLISM	KEGG	0.012	0.144697	0.396
KEGG_VALINE_LEUCINE_AND_ISOLEUCINE_DEGRADATION	KEGG	0.0121212	0.829511	0.311
KEGG_PORPHYRIN_AND_CHLOROPHYLL_METABOLISM	KEGG	0.01222	0.131359	0.401
KEGG_GLYOXYLATE_AND_DICARBOXYLATE_METABOLISM	KEGG	0.0143737	0.0947611	0.732
KEGG_LYSINE_DEGRADATION	KEGG	0.0177866	0.102494	0.65
KEGG_RETINOL_METABOLISM	KEGG	0.0184426	0.102133	0.473
KEGG_BASE_EXCISION_REPAIR	KEGG	0.0198413	0.0939267	0.515
KEGG_PROTEIN_EXPORT	KEGG	0.0200803	0.0956203	0.571
KEGG_PROPANOATE_METABOLISM	KEGG	0.020202	0.111665	0.411
KEGG_CITRATE_CYCLE_TCA_CYCLE	KEGG	0.0211864	0.0976723	0.481
KEGG_ALANINE_ASPARTATE_AND_GLUTAMATE_METABOLISM	KEGG	0.0243408	0.118604	0.402
KEGG_TRYPTOPHAN_METABOLISM	KEGG	0.0246407	0.102442	0.411
KEGG_METABOLISM_OF_XENOBIOTICS_BY_CYTOCHROME_P450	KEGG	0.026	0.096877	0.54
KEGG_LINOLEIC_ACID_METABOLISM	KEGG	0.0342742	0.108929	0.472
KEGG_PEROXISOME	KEGG	0.0409836	0.0946096	0.484
KEGG_DRUG_METABOLISM_CYTOCHROME_P450	KEGG	0.0425963	0.0983312	0.708
KEGG_ONE_CARBON_POOL_BY_FOLATE	KEGG	0.043659	0.103979	0.708
KEGG_SELENOAMINO_ACID_METABOLISM	KEGG	0.0451745	0.101621	0.66
KEGG_NITROGEN_METABOLISM	KEGG	0.0466531	0.0983771	0.715
KEGG_AMINOACYL_TRNA_BIOSYNTHESIS	KEGG	0.046748	0.107075	0.701
KEGG_ARGININE_AND_PROLINE_METABOLISM	KEGG	0.0474227	0.103417	0.701
KEGG_PYRUVATE_METABOLISM	KEGG	0.0541667	0.0978883	0.56
KEGG_PROXIMAL_TUBULE_BICARBONATE_RECLAMATION	KEGG	0.0542798	0.10104	0.635
KEGG_GLYCINE_SERINE_AND_THREONINE_METABOLISM	KEGG	0.0571429	0.0934028	0.752
KEGG_STARCH_AND_SUCROSE_METABOLISM	KEGG	0.0572597	0.094633	0.717
KEGG_BUTANOATE_METABOLISM	KEGG	0.0621242	0.101099	0.619
KEGG_APOPTOSIS	KEGG	0.0651731	0.194436	0.952
KEGG_BIOSYNTHESIS_OF_UNSATURATED_FATTY_ACIDS	KEGG	0.065678	0.106227	0.773
KEGG_PENTOSE_PHOSPHATE_PATHWAY	KEGG	0.0677966	0.0965787	0.715
KEGG_AMINO_SUGAR_AND_NUCLEOTIDE_SUGAR_METABOLISM	KEGG	0.0743802	0.114622	0.803
KEGG_TERPENOID_BACKBONE_BIOSYNTHESIS	KEGG	0.0744467	0.0956562	0.752
KEGG_ETHER_LIPID_METABOLISM	KEGG	0.0767635	0.203467	0.949
KEGG_GLYCOLYSIS_GLUCONEOGENESIS	KEGG	0.0809717	0.0981571	0.752
KEGG_THYROID_CANCER	KEGG	0.0942623	0.213953	0.969
KEGG_ARACHIDONIC_ACID_METABOLISM	KEGG	0.0989691	0.160335	0.895
KEGG_BETA_ALANINE_METABOLISM	KEGG	0.118126	0.196565	0.949
KEGG_CYSTEINE_AND_METHIONINE_METABOLISM	KEGG	0.119748	0.200135	0.958
KEGG_PANTOTHENATE_AND_COA_BIOSYNTHESIS	KEGG	0.127789	0.193982	0.94
KEGG_DRUG_METABOLISM_OTHER_ENZYMES	KEGG	0.12831	0.159042	0.887
KEGG_OXIDATIVE_PHOSPHORYLATION	KEGG	0.130178	0.0905473	0.486
KEGG_STEROID_HORMONE_BIOSYNTHESIS	KEGG	0.135903	0.205408	0.958
KEGG_RENIN_ANGIOTENSIN_SYSTEM	KEGG	0.136	0.199533	0.949
KEGG_PRIMARY_BILE_ACID_BIOSYNTHESIS	KEGG	0.136095	0.165253	0.901
KEGG_HUNTINGTONS_DISEASE	KEGG	0.156942	0.27818	0.982
KEGG_MISMATCH_REPAIR	KEGG	0.159046	0.174809	0.923
KEGG_FATTY_ACID_METABOLISM	KEGG	0.168699	0.218708	0.969
KEGG_SPLICEOSOME	KEGG	0.17004	0.116332	0.803
KEGG_PARKINSONS_DISEASE	KEGG	0.179226	0.214838	0.969
KEGG_GLYCEROPHOSPHOLIPID_METABOLISM	KEGG	0.183761	0.355324	0.997
KEGG_AMYOTROPHIC_LATERAL_SCLEROSIS_ALS	KEGG	0.184109	0.356183	0.997
KEGG_DNA_REPLICATION	KEGG	0.201613	0.19814	0.943
KEGG_BASAL_TRANSCRIPTION_FACTORS	KEGG	0.226263	0.242806	0.981
KEGG_ABC_TRANSPORTERS	KEGG	0.232	0.357979	0.997
KEGG_CELL_CYCLE	KEGG	0.244048	0.243094	0.981
KEGG_GLYCOSYLPHOSPHATIDYLINOSITOL_GPI_ANCHOR_BIOSYNTHESIS	KEGG	0.245436	0.345007	0.994
KEGG_NUCLEOTIDE_EXCISION_REPAIR	KEGG	0.25462	0.276204	0.982
KEGG_PURINE_METABOLISM	KEGG	0.259766	0.384226	0.997
KEGG_O_GLYCAN_BIOSYNTHESIS	KEGG	0.260784	0.373632	0.997
KEGG_SPHINGOLIPID_METABOLISM	KEGG	0.278826	0.384885	0.997
KEGG_ALPHA_LINOLENIC_ACID_METABOLISM	KEGG	0.288344	0.387591	0.997
KEGG_HOMOLOGOUS_RECOMBINATION	KEGG	0.292585	0.294651	0.988
KEGG_PRION_DISEASES	KEGG	0.30888	0.416919	0.998
KEGG_VASOPRESSIN_REGULATED_WATER_REABSORPTION	KEGG	0.312127	0.41434	0.998
KEGG_OOCYTE_MEIOSIS	KEGG	0.329389	0.381196	0.997
KEGG_NOD_LIKE_RECEPTOR_SIGNALING_PATHWAY	KEGG	0.331337	0.409222	0.998
KEGG_RNA_DEGRADATION	KEGG	0.340816	0.409926	0.998
KEGG_PROTEASOME	KEGG	0.342975	0.386489	0.998
KEGG_P53_SIGNALING_PATHWAY	KEGG	0.37182	0.431301	0.998
KEGG_COMPLEMENT_AND_COAGULATION_CASCADES	KEGG	0.38833	0.415052	0.998
KEGG_PYRIMIDINE_METABOLISM	KEGG	0.410678	0.42678	0.998
KEGG_RNA_POLYMERASE	KEGG	0.43487	0.425973	0.998
KEGG_STEROID_BIOSYNTHESIS	KEGG	0.45	0.494468	1
KEGG_OTHER_GLYCAN_DEGRADATION	KEGG	0.451807	0.47366	1
KEGG_PROGESTERONE_MEDIATED_OOCYTE_MATURATION	KEGG	0.481482	0.52019	1
KEGG_N_GLYCAN_BIOSYNTHESIS	KEGG	0.508911	0.543458	1
KEGG_UBIQUITIN_MEDIATED_PROTEOLYSIS	KEGG	0.533589	0.589893	1
KEGG_GALACTOSE_METABOLISM	KEGG	0.554435	0.554619	1
KEGG_PPAR_SIGNALING_PATHWAY	KEGG	0.588235	0.628584	1
KEGG_ANTIGEN_PROCESSING_AND_PRESENTATION	KEGG	0.721212	0.696419	1
KEGG_SYSTEMIC_LUPUS_ERYTHEMATOSUS	KEGG	0.737354	0.742511	1
KEGG_CYTOSOLIC_DNA_SENSING_PATHWAY	KEGG	0.788732	0.77924	1
REACTOME_NONSENSE_MEDIATED_DECAY_ENHANCED_BY_THE_EXON_JUNCTION_COMPLEX	REACTOME	0	0.148344	0.059
REACTOME_METABOLISM_OF_AMINO_ACIDS_AND_DERIVATIVES	REACTOME	0	0.304875	0.2
REACTOME_3_UTR_MEDIATED_TRANSLATIONAL_REGULATION	REACTOME	0	0.337314	0.332
REACTOME_INFLUENZA_VIRAL_RNA_TRANSCRIPTION_AND_REPLICATION	REACTOME	0	0.278875	0.337
REACTOME_FORMATION_OF_THE_TERNARY_COMPLEX_AND_SUBSEQUENTLY_THE_43S_COMPLEX	REACTOME	0	0.215879	0.353
REACTOME_ACTIVATION_OF_THE_MRNA_UPON_BINDING_OF_THE_CAP_BINDING_COMPLEX_AND_EIFS_AND_SUBSEQUENT_BINDING_TO_43S	REACTOME	0	0.206561	0.373
REACTOME_SULFUR_AMINO_ACID_METABOLISM	REACTOME	0	0.248956	0.546
REACTOME_CITRIC_ACID_CYCLE_TCA_CYCLE	REACTOME	0	0.239771	0.626
REACTOME_PEPTIDE_CHAIN_ELONGATION	REACTOME	0	0.244815	0.713
REACTOME_PHASE_II_CONJUGATION	REACTOME	0.00193424	0.250058	0.573
REACTOME_MITOCHONDRIAL_TRNA_AMINOACYLATION	REACTOME	0.00423729	0.244317	0.765
REACTOME_MITOCHONDRIAL_PROTEIN_IMPORT	REACTOME	0.00811359	0.238216	0.642
REACTOME_BASE_EXCISION_REPAIR	REACTOME	0.0121212	0.240844	0.828
REACTOME_FORMATION_OF_ATP_BY_CHEMIOSMOTIC_COUPLING	REACTOME	0.0147679	0.393455	1
REACTOME_AMINE_DERIVED_HORMONES	REACTOME	0.0150943	0.249707	0.592
REACTOME_GLUTATHIONE_CONJUGATION	REACTOME	0.0156863	0.252993	0.745
REACTOME_TRANSLATION	REACTOME	0.0160643	0.394369	0.299
REACTOME_RESOLUTION_OF_AP_SITES_VIA_THE_MULTIPLE_NUCLEOTIDE_PATCH_REPLACEMENT_PATHWAY	REACTOME	0.0184805	0.291059	0.917
REACTOME_ANTIGEN_PRESENTATION_FOLDING_ASSEMBLY_AND_PEPTIDE_LOADING_OF_CLASS_I_MHC	REACTOME	0.0196078	0.249255	0.737
REACTOME_PYRUVATE_METABOLISM_AND_CITRIC_ACID_TCA_CYCLE	REACTOME	0.021097	0.253881	0.821
REACTOME_TRNA_AMINOACYLATION	REACTOME	0.0236559	0.242212	0.838
REACTOME_AMINO_ACID_AND_OLIGOPEPTIDE_SLC_TRANSPORTERS	REACTOME	0.024	0.34271	0.997
REACTOME_BIOLOGICAL_OXIDATIONS	REACTOME	0.0290698	0.228253	0.838
REACTOME_APOPTOTIC_CLEAVAGE_OF_CELLULAR_PROTEINS	REACTOME	0.0335306	0.311446	0.976
REACTOME_TRIGLYCERIDE_BIOSYNTHESIS	REACTOME	0.0376569	0.334405	0.993
REACTOME_NEF_MEDIATES_DOWN_MODULATION_OF_CELL_SURFACE_RECEPTORS_BY_RECRUITING_THEM_TO_CLATHRIN_ADAPTERS	REACTOME	0.0381526	0.249358	0.828
REACTOME_TCA_CYCLE_AND_RESPIRATORY_ELECTRON_TRANSPORT	REACTOME	0.0403397	0.241839	0.346
REACTOME_ENOS_ACTIVATION_AND_REGULATION	REACTOME	0.0431373	0.319837	0.969
REACTOME_REGULATORY_RNA_PATHWAYS	REACTOME	0.0441767	0.288213	0.927
REACTOME_REGULATION_OF_BETA_CELL_DEVELOPMENT	REACTOME	0.0444874	0.321117	0.975
REACTOME_SRP_DEPENDENT_COTRANSLATIONAL_PROTEIN_TARGETING_TO_MEMBRANE	REACTOME	0.0446602	0.249036	0.792
REACTOME_BIOSYNTHESIS_OF_THE_N_GLYCAN_PRECURSOR_DOLICHOL_LIPID_LINKED_OLIGOSACCHARIDE_LLO_AND_TRANSFER_TO_A_NASCENT_PROTEIN	REACTOME	0.0447761	0.289598	0.953
REACTOME_ASSEMBLY_OF_THE_PRE_REPLICATIVE_COMPLEX	REACTOME	0.0489796	0.241345	0.795
REACTOME_P53_INDEPENDENT_G1_S_DNA_DAMAGE_CHECKPOINT	REACTOME	0.0509804	0.248853	0.68
REACTOME_MRNA_SPLICING	REACTOME	0.0523139	0.20726	0.404
REACTOME_METABOLISM_OF_PROTEINS	REACTOME	0.0553279	0.321769	0.985
REACTOME_PEROXISOMAL_LIPID_METABOLISM	REACTOME	0.061144	0.310287	0.962
REACTOME_CDT1_ASSOCIATION_WITH_THE_CDC6_ORC_ORIGIN_COMPLEX	REACTOME	0.0612245	0.223363	0.839
REACTOME_LYSOSOME_VESICLE_BIOGENESIS	REACTOME	0.0614407	0.32085	0.969
REACTOME_THE_ROLE_OF_NEF_IN_HIV1_REPLICATION_AND_DISEASE_PATHOGENESIS	REACTOME	0.0615079	0.340229	0.993
REACTOME_METABOLISM_OF_MRNA	REACTOME	0.0631365	0.216063	0.455
REACTOME_METABOLISM_OF_NUCLEOTIDES	REACTOME	0.0673469	0.315434	0.973
REACTOME_RESPIRATORY_ELECTRON_TRANSPORT	REACTOME	0.0673684	0.295444	0.955
REACTOME_APOPTOSIS	REACTOME	0.0711611	0.388091	1
REACTOME_CELL_CYCLE_CHECKPOINTS	REACTOME	0.0714286	0.250413	0.759
REACTOME_PHASE1_FUNCTIONALIZATION_OF_COMPOUNDS	REACTOME	0.0721248	0.307089	0.976
REACTOME_BRANCHED_CHAIN_AMINO_ACID_CATABOLISM	REACTOME	0.0759494	0.311836	0.975
REACTOME_AMINE_COMPOUND_SLC_TRANSPORTERS	REACTOME	0.0782779	0.401857	1
REACTOME_ACTIVATION_OF_ATR_IN_RESPONSE_TO_REPLICATION_STRESS	REACTOME	0.0808511	0.325995	0.969
REACTOME_METABOLISM_OF_RNA	REACTOME	0.0824742	0.240404	0.598
REACTOME_MRNA_SPLICING_MINOR_PATHWAY	REACTOME	0.0828157	0.226919	0.85
REACTOME_MRNA_3_END_PROCESSING	REACTOME	0.083503	0.272069	0.945
REACTOME_SYNTHESIS_OF_BILE_ACIDS_AND_BILE_SALTS	REACTOME	0.0839695	0.315908	0.966
REACTOME_METABOLISM_OF_VITAMINS_AND_COFACTORS	REACTOME	0.0841683	0.32277	0.995
REACTOME_P53_DEPENDENT_G1_DNA_DAMAGE_RESPONSE	REACTOME	0.0843373	0.284315	0.917
REACTOME_FATTY_ACID_TRIACYLGLYCEROL_AND_KETONE_BODY_METABOLISM	REACTOME	0.0855397	0.382602	1
REACTOME_RESPIRATORY_ELECTRON_TRANSPORT_ATP_SYNTHESIS_BY_CHEMIOSMOTIC_COUPLING_AND_HEAT_PRODUCTION_BY_UNCOUPLING_PROTEINS_	REACTOME	0.085595	0.312763	0.978
REACTOME_SYNTHESIS_OF_GLYCOSYLPHOSPHATIDYLINOSITOL_GPI	REACTOME	0.0869565	0.348058	0.993
REACTOME_PROCESSING_OF_CAPPED_INTRON_CONTAINING_PRE_MRNA	REACTOME	0.0873984	0.247724	0.703
REACTOME_CYTOCHROME_P450_ARRANGED_BY_SUBSTRATE_TYPE	REACTOME	0.0926641	0.323056	0.983
REACTOME_APC_C_CDH1_MEDIATED_DEGRADATION_OF_CDC20_AND_OTHER_APC_C_CDH1_TARGETED_PROTEINS_IN_LATE_MITOSIS_EARLY_G1	REACTOME	0.093361	0.23568	0.838
REACTOME_APOPTOTIC_EXECUTION_PHASE	REACTOME	0.0960784	0.391126	1
REACTOME_EXTENSION_OF_TELOMERES	REACTOME	0.0967078	0.317502	0.971
REACTOME_M_G1_TRANSITION	REACTOME	0.10559	0.2655	0.932
REACTOME_INTRINSIC_PATHWAY_FOR_APOPTOSIS	REACTOME	0.106383	0.391498	1
REACTOME_APC_C_CDC20_MEDIATED_DEGRADATION_OF_MITOTIC_PROTEINS	REACTOME	0.10856	0.270771	0.932
REACTOME_G2_M_CHECKPOINTS	REACTOME	0.108974	0.325222	0.969
REACTOME_REGULATION_OF_GENE_EXPRESSION_IN_BETA_CELLS	REACTOME	0.109804	0.400495	1
REACTOME_MICRORNA_MIRNA_BIOGENESIS	REACTOME	0.114519	0.325749	0.995
REACTOME_DNA_STRAND_ELONGATION	REACTOME	0.116183	0.323919	0.983
REACTOME_MRNA_PROCESSING	REACTOME	0.116667	0.27966	0.932
REACTOME_PKB_MEDIATED_EVENTS	REACTOME	0.124236	0.398904	1
REACTOME_LAGGING_STRAND_SYNTHESIS	REACTOME	0.125	0.31423	0.979
REACTOME_NUCLEOTIDE_BINDING_DOMAIN_LEUCINE_RICH_REPEAT_CONTAINING_RECEPTOR_NLR_SIGNALING_PATHWAYS	REACTOME	0.128353	0.420823	1
REACTOME_TRANSMEMBRANE_TRANSPORT_OF_SMALL_MOLECULES	REACTOME	0.131183	0.415681	1
REACTOME_TRAF6_MEDIATED_IRF7_ACTIVATION	REACTOME	0.133192	0.366008	0.997
REACTOME_ACTIVATION_OF_THE_PRE_REPLICATIVE_COMPLEX	REACTOME	0.135417	0.3218	0.978
REACTOME_AUTODEGRADATION_OF_CDH1_BY_CDH1_APC_C	REACTOME	0.13963	0.322207	0.966
REACTOME_PHOSPHORYLATION_OF_THE_APC_C	REACTOME	0.140044	0.331516	0.995
REACTOME_SYNTHESIS_OF_BILE_ACIDS_AND_BILE_SALTS_VIA_7ALPHA_HYDROXYCHOLESTEROL	REACTOME	0.142035	0.342117	0.993
REACTOME_ORC1_REMOVAL_FROM_CHROMATIN	REACTOME	0.142857	0.282955	0.932
REACTOME_SYNTHESIS_OF_DNA	REACTOME	0.143443	0.290001	0.926
REACTOME_PURINE_METABOLISM	REACTOME	0.143969	0.340149	0.997
REACTOME_HIV_INFECTION	REACTOME	0.14741	0.345482	0.993
REACTOME_CLEAVAGE_OF_GROWING_TRANSCRIPT_IN_THE_TERMINATION_REGION_	REACTOME	0.147844	0.31813	0.971
REACTOME_APC_C_CDC20_MEDIATED_DEGRADATION_OF_CYCLIN_B	REACTOME	0.149451	0.334155	0.995
REACTOME_ACTIVATED_AMPK_STIMULATES_FATTY_ACID_OXIDATION_IN_MUSCLE	REACTOME	0.150794	0.396818	0.999
REACTOME_REGULATION_OF_KIT_SIGNALING	REACTOME	0.151093	0.417362	1
REACTOME_FATTY_ACYL_COA_BIOSYNTHESIS	REACTOME	0.155462	0.396597	1
REACTOME_INFLUENZA_LIFE_CYCLE	REACTOME	0.155925	0.322714	0.967
REACTOME_O_LINKED_GLYCOSYLATION_OF_MUCINS	REACTOME	0.156576	0.416848	1
REACTOME_HOST_INTERACTIONS_OF_HIV_FACTORS	REACTOME	0.157787	0.340611	0.997
REACTOME_S_PHASE	REACTOME	0.163223	0.27616	0.932
REACTOME_NOD1_2_SIGNALING_PATHWAY	REACTOME	0.167969	0.419577	1
REACTOME_PROCESSIVE_SYNTHESIS_ON_THE_LAGGING_STRAND	REACTOME	0.169043	0.330348	0.995
REACTOME_ANTIGEN_PROCESSING_UBIQUITINATION_PROTEASOME_DEGRADATION	REACTOME	0.169043	0.417363	1
REACTOME_TRANSPORT_OF_MATURE_TRANSCRIPT_TO_CYTOPLASM	REACTOME	0.170833	0.316528	0.975
REACTOME_RNA_POL_II_TRANSCRIPTION	REACTOME	0.171079	0.331871	0.995
REACTOME_VIF_MEDIATED_DEGRADATION_OF_APOBEC3G	REACTOME	0.172917	0.337522	0.993
REACTOME_ABC_FAMILY_PROTEINS_MEDIATED_TRANSPORT	REACTOME	0.176245	0.391119	1
REACTOME_AUTODEGRADATION_OF_THE_E3_UBIQUITIN_LIGASE_COP1	REACTOME	0.177515	0.317584	0.978
REACTOME_GLOBAL_GENOMIC_NER_GG_NER	REACTOME	0.177966	0.345672	0.993
REACTOME_GLUCOSE_METABOLISM	REACTOME	0.183267	0.38545	1
REACTOME_METABOLISM_OF_LIPIDS_AND_LIPOPROTEINS	REACTOME	0.186508	0.423751	1
REACTOME_FORMATION_OF_FIBRIN_CLOT_CLOTTING_CASCADE	REACTOME	0.1875	0.380724	1
REACTOME_PPARA_ACTIVATES_GENE_EXPRESSION	REACTOME	0.190574	0.453883	1
REACTOME_INHIBITION_OF_THE_PROTEOLYTIC_ACTIVITY_OF_APC_C_REQUIRED_FOR_THE_ONSET_OF_ANAPHASE_BY_MITOTIC_SPINDLE_CHECKPOINT_COMPONENTS	REACTOME	0.197397	0.344305	0.997
REACTOME_DNA_REPAIR	REACTOME	0.198732	0.332167	0.993
REACTOME_POST_TRANSLATIONAL_MODIFICATION_SYNTHESIS_OF_GPI_ANCHORED_PROTEINS	REACTOME	0.199179	0.379312	1
REACTOME_SYNTHESIS_OF_PA	REACTOME	0.202899	0.427029	1
REACTOME_PEPTIDE_LIGAND_BINDING_RECEPTORS	REACTOME	0.205078	0.458839	1
REACTOME_CDK_MEDIATED_PHOSPHORYLATION_AND_REMOVAL_OF_CDC6	REACTOME	0.205479	0.329192	0.995
REACTOME_HIV_LIFE_CYCLE	REACTOME	0.207243	0.34142	0.997
REACTOME_CHEMOKINE_RECEPTORS_BIND_CHEMOKINES	REACTOME	0.207843	0.381216	0.997
REACTOME_CHYLOMICRON_MEDIATED_LIPID_TRANSPORT	REACTOME	0.209901	0.400053	1
REACTOME_APC_CDC20_MEDIATED_DEGRADATION_OF_NEK2A	REACTOME	0.211991	0.345601	0.997
REACTOME_POST_TRANSLATIONAL_PROTEIN_MODIFICATION	REACTOME	0.213983	0.447057	1
REACTOME_TIGHT_JUNCTION_INTERACTIONS	REACTOME	0.219008	0.393193	1
REACTOME_SYNTHESIS_AND_INTERCONVERSION_OF_NUCLEOTIDE_DI_AND_TRIPHOSPHATES	REACTOME	0.219316	0.386464	1
REACTOME_DNA_REPLICATION	REACTOME	0.219665	0.332933	0.989
REACTOME_REGULATION_OF_ORNITHINE_DECARBOXYLASE_ODC	REACTOME	0.224609	0.34197	0.997
REACTOME_G_ALPHA_I_SIGNALLING_EVENTS	REACTOME	0.2249	0.460852	1
REACTOME_TRANSPORT_OF_INORGANIC_CATIONS_ANIONS_AND_AMINO_ACIDS_OLIGOPEPTIDES	REACTOME	0.228106	0.467778	1
REACTOME_GLUCOSE_TRANSPORT	REACTOME	0.23125	0.409263	1
REACTOME_TRAFFICKING_OF_GLUR2_CONTAINING_AMPA_RECEPTORS	REACTOME	0.233083	0.410477	1
REACTOME_BILE_ACID_AND_BILE_SALT_METABOLISM	REACTOME	0.233463	0.401154	1
REACTOME_METABOLISM_OF_NON_CODING_RNA	REACTOME	0.23431	0.329001	0.995
REACTOME_MITOTIC_M_M_G1_PHASES	REACTOME	0.234801	0.335448	0.993
REACTOME_RIG_I_MDA5_MEDIATED_INDUCTION_OF_IFN_ALPHA_BETA_PATHWAYS	REACTOME	0.23619	0.426844	1
REACTOME_RNA_POL_II_PRE_TRANSCRIPTION_EVENTS	REACTOME	0.236842	0.380957	1
REACTOME_CYTOSOLIC_TRNA_AMINOACYLATION	REACTOME	0.239407	0.382562	1
REACTOME_DEADENYLATION_DEPENDENT_MRNA_DECAY	REACTOME	0.239521	0.38926	1
REACTOME_SPHINGOLIPID_METABOLISM	REACTOME	0.243408	0.449914	1
REACTOME_G1_S_TRANSITION	REACTOME	0.244306	0.333631	0.995
REACTOME_CONVERSION_FROM_APC_C_CDC20_TO_APC_C_CDH1_IN_LATE_ANAPHASE	REACTOME	0.245119	0.389078	1
REACTOME_NUCLEAR_RECEPTOR_TRANSCRIPTION_PATHWAY	REACTOME	0.246548	0.450519	1
REACTOME_SLC_MEDIATED_TRANSMEMBRANE_TRANSPORT	REACTOME	0.25	0.458919	1
REACTOME_SCFSKP2_MEDIATED_DEGRADATION_OF_P27_P21	REACTOME	0.252588	0.387469	1
REACTOME_CELL_CYCLE	REACTOME	0.257322	0.371477	0.997
REACTOME_DESTABILIZATION_OF_MRNA_BY_AUF1_HNRNP_D0	REACTOME	0.260784	0.398655	0.999
REACTOME_TELOMERE_MAINTENANCE	REACTOME	0.262156	0.413806	1
REACTOME_CLASS_I_MHC_MEDIATED_ANTIGEN_PROCESSING_PRESENTATION	REACTOME	0.263265	0.471244	1
REACTOME_LATE_PHASE_OF_HIV_LIFE_CYCLE	REACTOME	0.263374	0.37904	1
REACTOME_MEIOTIC_RECOMBINATION	REACTOME	0.266667	0.386132	1
REACTOME_TRANSPORT_OF_MATURE_MRNA_DERIVED_FROM_AN_INTRONLESS_TRANSCRIPT	REACTOME	0.267094	0.396472	0.999
REACTOME_CELL_CYCLE_MITOTIC	REACTOME	0.267368	0.380024	0.999
REACTOME_REGULATION_OF_MITOTIC_CELL_CYCLE	REACTOME	0.268499	0.400388	0.999
REACTOME_INTERFERON_ALPHA_BETA_SIGNALING	REACTOME	0.270378	0.426187	1
REACTOME_ASPARAGINE_N_LINKED_GLYCOSYLATION	REACTOME	0.270492	0.45721	1
REACTOME_MRNA_CAPPING	REACTOME	0.272727	0.411907	1
REACTOME_RNA_POL_III_TRANSCRIPTION_INITIATION_FROM_TYPE_2_PROMOTER	REACTOME	0.273267	0.411376	1
REACTOME_KINESINS	REACTOME	0.274678	0.39013	1
REACTOME_PHOSPHOLIPID_METABOLISM	REACTOME	0.274793	0.485522	1
REACTOME_RNA_POL_II_TRANSCRIPTION_PRE_INITIATION_AND_PROMOTER_OPENING	REACTOME	0.275	0.383122	1
REACTOME_SPHINGOLIPID_DE_NOVO_BIOSYNTHESIS	REACTOME	0.282443	0.454866	1
REACTOME_NUCLEOTIDE_EXCISION_REPAIR	REACTOME	0.284232	0.399462	1
REACTOME_DEADENYLATION_OF_MRNA	REACTOME	0.286013	0.472379	1
REACTOME_MITOTIC_G1_G1_S_PHASES	REACTOME	0.289256	0.38394	1
REACTOME_PROCESSING_OF_CAPPED_INTRONLESS_PRE_MRNA	REACTOME	0.291322	0.415515	1
REACTOME_MITOTIC_PROMETAPHASE	REACTOME	0.296218	0.401243	1
REACTOME_COMPLEMENT_CASCADE	REACTOME	0.299413	0.452958	1
REACTOME_GOLGI_ASSOCIATED_VESICLE_BIOGENESIS	REACTOME	0.300439	0.456512	1
REACTOME_GLYCOSPHINGOLIPID_METABOLISM	REACTOME	0.301282	0.46646	1
REACTOME_FANCONI_ANEMIA_PATHWAY	REACTOME	0.301724	0.411257	1
REACTOME_CELL_CELL_JUNCTION_ORGANIZATION	REACTOME	0.302144	0.474935	1
REACTOME_CHROMOSOME_MAINTENANCE	REACTOME	0.305439	0.413495	1
REACTOME_TRANSCRIPTION	REACTOME	0.311475	0.454661	1
REACTOME_GLUCONEOGENESIS	REACTOME	0.315464	0.452874	1
REACTOME_TRANSCRIPTION_COUPLED_NER_TC_NER	REACTOME	0.316222	0.414728	1
REACTOME_FORMATION_OF_INCISION_COMPLEX_IN_GG_NER	REACTOME	0.317907	0.454881	1
REACTOME_ENDOGENOUS_STEROLS	REACTOME	0.320158	0.455665	1
REACTOME_ER_PHAGOSOME_PATHWAY	REACTOME	0.321083	0.422818	1
REACTOME_CYCLIN_E_ASSOCIATED_EVENTS_DURING_G1_S_TRANSITION_	REACTOME	0.324153	0.426614	1
REACTOME_GLYCEROPHOSPHOLIPID_BIOSYNTHESIS	REACTOME	0.330561	0.51065	1
REACTOME_MEIOSIS	REACTOME	0.333333	0.452144	1
REACTOME_FORMATION_OF_RNA_POL_II_ELONGATION_COMPLEX_	REACTOME	0.333333	0.458811	1
REACTOME_SCF_BETA_TRCP_MEDIATED_DEGRADATION_OF_EMI1	REACTOME	0.337349	0.453461	1
REACTOME_NA_CL_DEPENDENT_NEUROTRANSMITTER_TRANSPORTERS	REACTOME	0.337349	0.501426	1
REACTOME_AMINO_ACID_SYNTHESIS_AND_INTERCONVERSION_TRANSAMINATION	REACTOME	0.340726	0.454813	1
REACTOME_REGULATION_OF_WATER_BALANCE_BY_RENAL_AQUAPORINS	REACTOME	0.343815	0.53251	1
REACTOME_FORMATION_OF_THE_HIV1_EARLY_ELONGATION_COMPLEX	REACTOME	0.344898	0.484455	1
REACTOME_AQUAPORIN_MEDIATED_TRANSPORT	REACTOME	0.347826	0.534275	1
REACTOME_RECYCLING_PATHWAY_OF_L1	REACTOME	0.349794	0.508574	1
REACTOME_DOUBLE_STRAND_BREAK_REPAIR	REACTOME	0.351579	0.461543	1
REACTOME_SYNTHESIS_OF_PC	REACTOME	0.358921	0.506885	1
REACTOME_NEP_NS2_INTERACTS_WITH_THE_CELLULAR_EXPORT_MACHINERY	REACTOME	0.359081	0.425994	1
REACTOME_RECRUITMENT_OF_MITOTIC_CENTROSOME_PROTEINS_AND_COMPLEXES	REACTOME	0.362105	0.483521	1
REACTOME_TRAF6_MEDIATED_NFKB_ACTIVATION	REACTOME	0.363458	0.481384	1
REACTOME_E2F_MEDIATED_REGULATION_OF_DNA_REPLICATION	REACTOME	0.364017	0.424733	1
REACTOME_TRANSPORT_OF_VITAMINS_NUCLEOSIDES_AND_RELATED_MOLECULES	REACTOME	0.365657	0.481037	1
REACTOME_RNA_POL_I_TRANSCRIPTION_TERMINATION	REACTOME	0.366667	0.453797	1
REACTOME_MITOTIC_G2_G2_M_PHASES	REACTOME	0.366738	0.471651	1
REACTOME_INTERFERON_SIGNALING	REACTOME	0.378378	0.543337	1
REACTOME_CLASS_A1_RHODOPSIN_LIKE_RECEPTORS	REACTOME	0.380952	0.560511	1
REACTOME_REGULATION_OF_GLUCOKINASE_BY_GLUCOKINASE_REGULATORY_PROTEIN	REACTOME	0.384146	0.461847	1
REACTOME_DEPOSITION_OF_NEW_CENPA_CONTAINING_NUCLEOSOMES_AT_THE_CENTROMERE	REACTOME	0.386694	0.500581	1
REACTOME_G1_S_SPECIFIC_TRANSCRIPTION	REACTOME	0.4	0.461117	1
REACTOME_RNA_POL_I_TRANSCRIPTION_INITIATION	REACTOME	0.409804	0.513324	1
REACTOME_REGULATION_OF_MRNA_STABILITY_BY_PROTEINS_THAT_BIND_AU_RICH_ELEMENTS	REACTOME	0.410714	0.526216	1
REACTOME_LOSS_OF_NLP_FROM_MITOTIC_CENTROSOMES	REACTOME	0.412134	0.519321	1
REACTOME_CYCLIN_A_B1_ASSOCIATED_EVENTS_DURING_G2_M_TRANSITION	REACTOME	0.415254	0.482133	1
REACTOME_ENDOSOMAL_SORTING_COMPLEX_REQUIRED_FOR_TRANSPORT_ESCRT	REACTOME	0.42029	0.562178	1
REACTOME_INNATE_IMMUNE_SYSTEM	REACTOME	0.423077	0.564173	1
REACTOME_HOMOLOGOUS_RECOMBINATION_REPAIR_OF_REPLICATION_INDEPENDENT_DOUBLE_STRAND_BREAKS	REACTOME	0.423158	0.483622	1
REACTOME_MHC_CLASS_II_ANTIGEN_PRESENTATION	REACTOME	0.428879	0.565594	1
REACTOME_METAL_ION_SLC_TRANSPORTERS	REACTOME	0.436475	0.535754	1
REACTOME_TRANSFERRIN_ENDOCYTOSIS_AND_RECYCLING	REACTOME	0.441118	0.559133	1
REACTOME_CROSS_PRESENTATION_OF_SOLUBLE_EXOGENOUS_ANTIGENS_ENDOSOMES	REACTOME	0.449304	0.593185	1
REACTOME_INTERACTIONS_OF_VPR_WITH_HOST_CELLULAR_PROTEINS	REACTOME	0.458848	0.527843	1
REACTOME_GENERIC_TRANSCRIPTION_PATHWAY	REACTOME	0.462845	0.610666	1
REACTOME_GAP_JUNCTION_ASSEMBLY	REACTOME	0.464503	0.583016	1
REACTOME_ANTIVIRAL_MECHANISM_BY_IFN_STIMULATED_GENES	REACTOME	0.467078	0.562356	1
REACTOME_AMINO_ACID_TRANSPORT_ACROSS_THE_PLASMA_MEMBRANE	REACTOME	0.470103	0.582426	1
REACTOME_PRE_NOTCH_TRANSCRIPTION_AND_TRANSLATION	REACTOME	0.478439	0.577546	1
REACTOME_ABORTIVE_ELONGATION_OF_HIV1_TRANSCRIPT_IN_THE_ABSENCE_OF_TAT	REACTOME	0.482618	0.628066	1
REACTOME_G0_AND_EARLY_G1	REACTOME	0.495727	0.576992	1
REACTOME_METABOLISM_OF_STEROID_HORMONES_AND_VITAMINS_A_AND_D	REACTOME	0.499065	0.587635	1
REACTOME_RNA_POL_III_CHAIN_ELONGATION	REACTOME	0.507014	0.613509	1
REACTOME_REGULATION_OF_APOPTOSIS	REACTOME	0.515267	0.656845	1
REACTOME_TRANSPORT_OF_RIBONUCLEOPROTEINS_INTO_THE_HOST_NUCLEUS	REACTOME	0.516194	0.615971	1
REACTOME_NUCLEOTIDE_LIKE_PURINERGIC_RECEPTORS	REACTOME	0.51828	0.626535	1
REACTOME_ABCA_TRANSPORTERS_IN_LIPID_HOMEOSTASIS	REACTOME	0.521739	0.616591	1
REACTOME_RNA_POL_I_RNA_POL_III_AND_MITOCHONDRIAL_TRANSCRIPTION	REACTOME	0.539419	0.634386	1
REACTOME_STEROID_HORMONES	REACTOME	0.548571	0.627458	1
REACTOME_REGULATION_OF_INSULIN_SECRETION_BY_GLUCAGON_LIKE_PEPTIDE1	REACTOME	0.551935	0.62943	1
REACTOME_IRON_UPTAKE_AND_TRANSPORT	REACTOME	0.55666	0.636115	1
REACTOME_INTERFERON_GAMMA_SIGNALING	REACTOME	0.558366	0.638704	1
REACTOME_TRANS_GOLGI_NETWORK_VESICLE_BUDDING	REACTOME	0.558824	0.640487	1
REACTOME_RNA_POL_I_TRANSCRIPTION	REACTOME	0.565762	0.635378	1
REACTOME_ACTIVATED_TAK1_MEDIATES_P38_MAPK_ACTIVATION	REACTOME	0.565815	0.66277	1
REACTOME_GLYCOLYSIS	REACTOME	0.566462	0.63272	1
REACTOME_SIGNALLING_TO_P38_VIA_RIT_AND_RIN	REACTOME	0.573499	0.663882	1
REACTOME_ELONGATION_ARREST_AND_RECOVERY	REACTOME	0.576763	0.682865	1
REACTOME_SIGNALING_BY_WNT	REACTOME	0.580392	0.672828	1
REACTOME_LIPID_DIGESTION_MOBILIZATION_AND_TRANSPORT	REACTOME	0.581213	0.680315	1
REACTOME_ACYL_CHAIN_REMODELLING_OF_PG	REACTOME	0.582543	0.638264	1
REACTOME_ENERGY_DEPENDENT_REGULATION_OF_MTOR_BY_LKB1_AMPK	REACTOME	0.595918	0.675079	1
REACTOME_AMINE_LIGAND_BINDING_RECEPTORS	REACTOME	0.606996	0.666851	1
REACTOME_RNA_POL_III_TRANSCRIPTION	REACTOME	0.616302	0.680308	1
REACTOME_ION_TRANSPORT_BY_P_TYPE_ATPASES	REACTOME	0.619355	0.661804	1
REACTOME_ZINC_TRANSPORTERS	REACTOME	0.626531	0.678371	1
REACTOME_GLYCOGEN_BREAKDOWN_GLYCOGENOLYSIS	REACTOME	0.62818	0.67155	1
REACTOME_RNA_POL_III_TRANSCRIPTION_TERMINATION	REACTOME	0.653923	0.794265	1
REACTOME_RNA_POL_III_TRANSCRIPTION_INITIATION_FROM_TYPE_3_PROMOTER	REACTOME	0.688845	0.774501	1
REACTOME_INTRINSIC_PATHWAY	REACTOME	0.714563	0.797612	1
REACTOME_PERK_REGULATED_GENE_EXPRESSION	REACTOME	0.715686	0.772844	1
REACTOME_AMYLOIDS	REACTOME	0.72449	0.834381	1
REACTOME_CHOLESTEROL_BIOSYNTHESIS	REACTOME	0.753747	0.859302	1
REACTOME_RNA_POL_I_PROMOTER_OPENING	REACTOME	0.787056	0.895438	1
REACTOME_PYRUVATE_METABOLISM	REACTOME	0.801556	0.798045	1
REACTOME_TRAFFICKING_OF_AMPA_RECEPTORS	REACTOME	0.805501	0.796194	1
REACTOME_MEIOTIC_SYNAPSIS	REACTOME	0.808824	0.880578	1
REACTOME_ION_CHANNEL_TRANSPORT	REACTOME	0.826923	0.837244	1
REACTOME_DESTABILIZATION_OF_MRNA_BY_KSRP	REACTOME	0.836257	0.898881	1
REACTOME_DESTABILIZATION_OF_MRNA_BY_TRISTETRAPROLIN_TTP	REACTOME	0.857426	0.929846	1
REACTOME_DARPP_32_EVENTS	REACTOME	0.876033	0.861835	1
REACTOME_PACKAGING_OF_TELOMERE_ENDS	REACTOME	0.877301	0.932882	1
REACTOME_FORMATION_OF_TRANSCRIPTION_COUPLED_NER_TC_NER_REPAIR_COMPLEX	REACTOME	0.888668	0.922079	1
REACTOME_DESTABILIZATION_OF_MRNA_BY_BRF1	REACTOME	0.892276	0.943498	1
REACTOME_TAK1_ACTIVATES_NFKB_BY_PHOSPHORYLATION_AND_ACTIVATION_OF_IKKS_COMPLEX	REACTOME	0.894636	0.891027	1
