# Supplementary material for: Generation of human hepatic progenitor cells with regenerative and metabolic capacities from primary hepatocytes
Source: eLife. 2019 Aug 8;8:e47313. doi: 10.7554/eLife.47313 (PMC6731094; doi:10.7554/eLife.47313)
Supplement: Supplementary file 2. [file elife-47313-supp2.xlsx]

## Sheet: Sheet1
Supplementary file 2. All the gene sets enriched in FAC cells at D14 of culture compared with D1 hepatocytes (assessed by GSEA)
NAME	Data base	NOM p-val	FDR q-val	FWER p-val
HALLMARK_GLYCOLYSIS	HALLMARK	0	0.772399	0.31
HALLMARK_MITOTIC_SPINDLE	HALLMARK	0	0.408861	0.325
HALLMARK_ESTROGEN_RESPONSE_LATE	HALLMARK	0	0.287031	0.337
HALLMARK_ESTROGEN_RESPONSE_EARLY	HALLMARK	0	0.301883	0.513
HALLMARK_APICAL_JUNCTION	HALLMARK	0.00204918	0.225879	0.345
HALLMARK_G2M_CHECKPOINT	HALLMARK	0.002079	0.198052	0.365
HALLMARK_MYOGENESIS	HALLMARK	0.0147368	0.240968	0.523
HALLMARK_E2F_TARGETS	HALLMARK	0.0190678	0.264777	0.516
HALLMARK_SPERMATOGENESIS	HALLMARK	0.041502	0.299656	0.68
HALLMARK_P53_PATHWAY	HALLMARK	0.0523013	0.275232	0.7
HALLMARK_WNT_BETA_CATENIN_SIGNALING	HALLMARK	0.0555556	0.248518	0.715
HALLMARK_APOPTOSIS	HALLMARK	0.0584677	0.25779	0.713
HALLMARK_APICAL_SURFACE	HALLMARK	0.0714286	0.301974	0.67
HALLMARK_EPITHELIAL_MESENCHYMAL_TRANSITION	HALLMARK	0.0770791	0.213652	0.552
HALLMARK_IL2_STAT5_SIGNALING	HALLMARK	0.108652	0.297524	0.774
HALLMARK_PROTEIN_SECRETION	HALLMARK	0.112871	0.219335	0.531
HALLMARK_MTORC1_SIGNALING	HALLMARK	0.174797	0.260679	0.703
HALLMARK_ADIPOGENESIS	HALLMARK	0.187377	0.306447	0.772
HALLMARK_REACTIVE_OXIGEN_SPECIES_PATHWAY	HALLMARK	0.21519	0.277162	0.747
HALLMARK_OXIDATIVE_PHOSPHORYLATION	HALLMARK	0.216769	0.292945	0.697
HALLMARK_HEME_METABOLISM	HALLMARK	0.222445	0.327349	0.824
HALLMARK_NOTCH_SIGNALING	HALLMARK	0.235656	0.353867	0.862
HALLMARK_UV_RESPONSE_DN	HALLMARK	0.239351	0.339592	0.817
HALLMARK_CHOLESTEROL_HOMEOSTASIS	HALLMARK	0.291585	0.336487	0.84
HALLMARK_HYPOXIA	HALLMARK	0.301848	0.423383	0.916
HALLMARK_ALLOGRAFT_REJECTION	HALLMARK	0.314115	0.441608	0.927
HALLMARK_PANCREAS_BETA_CELLS	HALLMARK	0.322515	0.376254	0.887
HALLMARK_MYC_TARGETS_V1	HALLMARK	0.342159	0.330572	0.821
HALLMARK_ANGIOGENESIS	HALLMARK	0.350105	0.331683	0.835
HALLMARK_DNA_REPAIR	HALLMARK	0.387295	0.380133	0.887
HALLMARK_PEROXISOME	HALLMARK	0.388446	0.423334	0.918
HALLMARK_UNFOLDED_PROTEIN_RESPONSE	HALLMARK	0.432866	0.444484	0.927
HALLMARK_PI3K_AKT_MTOR_SIGNALING	HALLMARK	0.487179	0.50883	0.958
HALLMARK_FATTY_ACID_METABOLISM	HALLMARK	0.514911	0.521067	0.958
HALLMARK_HEDGEHOG_SIGNALING	HALLMARK	0.53167	0.524049	0.963
HALLMARK_KRAS_SIGNALING_UP	HALLMARK	0.569745	0.554985	0.97
HALLMARK_ANDROGEN_RESPONSE	HALLMARK	0.614	0.570536	0.973
HALLMARK_MYC_TARGETS_V2	HALLMARK	0.620408	0.714806	0.989
HALLMARK_INTERFERON_ALPHA_RESPONSE	HALLMARK	0.649087	0.571678	0.974
KEGG_CELL_CYCLE	KEGG	0	0	0
KEGG_LYSOSOME	KEGG	0	0	0
KEGG_OOCYTE_MEIOSIS	KEGG	0	0	0
KEGG_AMINOACYL_TRNA_BIOSYNTHESIS	KEGG	0	0	0
KEGG_DNA_REPLICATION	KEGG	0	0	0
KEGG_PROGESTERONE_MEDIATED_OOCYTE_MATURATION	KEGG	0	0	0
KEGG_GLUTATHIONE_METABOLISM	KEGG	0	0	0
KEGG_NUCLEOTIDE_EXCISION_REPAIR	KEGG	0	0	0
KEGG_REGULATION_OF_ACTIN_CYTOSKELETON	KEGG	0	0	0
KEGG_FOCAL_ADHESION	KEGG	0	0	0
KEGG_ECM_RECEPTOR_INTERACTION	KEGG	0	0	0
KEGG_PHOSPHATIDYLINOSITOL_SIGNALING_SYSTEM	KEGG	0	0	0
KEGG_SMALL_CELL_LUNG_CANCER	KEGG	0	0	0
KEGG_BASE_EXCISION_REPAIR	KEGG	0	0	0
KEGG_VASOPRESSIN_REGULATED_WATER_REABSORPTION	KEGG	0	0	0
KEGG_P53_SIGNALING_PATHWAY	KEGG	0	0	0
KEGG_VIBRIO_CHOLERAE_INFECTION	KEGG	0	0	0
KEGG_ADHERENS_JUNCTION	KEGG	0	0	0
KEGG_MISMATCH_REPAIR	KEGG	0	0	0
KEGG_UBIQUITIN_MEDIATED_PROTEOLYSIS	KEGG	0	0	0
KEGG_N_GLYCAN_BIOSYNTHESIS	KEGG	0	0	0
KEGG_OTHER_GLYCAN_DEGRADATION	KEGG	0	0	0
KEGG_PURINE_METABOLISM	KEGG	0	0	0
KEGG_AXON_GUIDANCE	KEGG	0	0	0
KEGG_AMINO_SUGAR_AND_NUCLEOTIDE_SUGAR_METABOLISM	KEGG	0	0	0
KEGG_RIBOSOME	KEGG	0	0	0
KEGG_GLYCOSYLPHOSPHATIDYLINOSITOL_GPI_ANCHOR_BIOSYNTHESIS	KEGG	0	6.61728e-05	0.001
KEGG_O_GLYCAN_BIOSYNTHESIS	KEGG	0	6.38095e-05	0.001
KEGG_HOMOLOGOUS_RECOMBINATION	KEGG	0	6.16092e-05	0.001
KEGG_FRUCTOSE_AND_MANNOSE_METABOLISM	KEGG	0	0.00016927	0.003
KEGG_GLYCOSAMINOGLYCAN_DEGRADATION	KEGG	0	0.00016381	0.003
KEGG_GAP_JUNCTION	KEGG	0	0.000261548	0.005
KEGG_ENDOCYTOSIS	KEGG	0	0.000314229	0.006
KEGG_TIGHT_JUNCTION	KEGG	0	0.000449755	0.009
KEGG_APOPTOSIS	KEGG	0	0.000436905	0.009
KEGG_INOSITOL_PHOSPHATE_METABOLISM	KEGG	0	0.000424769	0.009
KEGG_PANCREATIC_CANCER	KEGG	0	0.000502712	0.011
KEGG_FC_GAMMA_R_MEDIATED_PHAGOCYTOSIS	KEGG	0	0.000533561	0.012
KEGG_COLORECTAL_CANCER	KEGG	0	0.000953489	0.022
KEGG_DILATED_CARDIOMYOPATHY	KEGG	0	0.00161686	0.038
KEGG_INSULIN_SIGNALING_PATHWAY	KEGG	0	0.00198674	0.046
KEGG_PATHWAYS_IN_CANCER	KEGG	0	0.00345623	0.084
KEGG_PYRIMIDINE_METABOLISM	KEGG	0	0.00426666	0.106
KEGG_ENDOMETRIAL_CANCER	KEGG	0	0.00435281	0.111
KEGG_LEUKOCYTE_TRANSENDOTHELIAL_MIGRATION	KEGG	0	0.0044118	0.114
KEGG_CHRONIC_MYELOID_LEUKEMIA	KEGG	0	0.00700375	0.178
KEGG_WNT_SIGNALING_PATHWAY	KEGG	0	0.0107288	0.271
KEGG_GLIOMA	KEGG	0	0.0106214	0.274
KEGG_MELANOGENESIS	KEGG	0	0.0115621	0.3
KEGG_ALZHEIMERS_DISEASE	KEGG	0	0.0129365	0.347
KEGG_HUNTINGTONS_DISEASE	KEGG	0	0.0153765	0.435
KEGG_CALCIUM_SIGNALING_PATHWAY	KEGG	0	0.0163163	0.47
KEGG_CHEMOKINE_SIGNALING_PATHWAY	KEGG	0	0.0198247	0.576
KEGG_MAPK_SIGNALING_PATHWAY	KEGG	0.00215517	0.0676737	0.984
KEGG_PROSTATE_CANCER	KEGG	0.0021978	0.0152728	0.426
KEGG_STARCH_AND_SUCROSE_METABOLISM	KEGG	0.00222222	0.0149829	0.41
KEGG_GNRH_SIGNALING_PATHWAY	KEGG	0.00222222	0.0166757	0.488
KEGG_ARRHYTHMOGENIC_RIGHT_VENTRICULAR_CARDIOMYOPATHY_ARVC	KEGG	0.00224719	0.0187309	0.552
KEGG_GALACTOSE_METABOLISM	KEGG	0.00228833	0.00320274	0.076
KEGG_ERBB_SIGNALING_PATHWAY	KEGG	0.00228833	0.0155756	0.446
KEGG_NEUROTROPHIN_SIGNALING_PATHWAY	KEGG	0.00229885	0.0150152	0.407
KEGG_LYSINE_DEGRADATION	KEGG	0.00235849	0.0153587	0.424
KEGG_LONG_TERM_POTENTIATION	KEGG	0.00241546	0.0156163	0.451
KEGG_AMYOTROPHIC_LATERAL_SCLEROSIS_ALS	KEGG	0.00440529	0.0104948	0.255
KEGG_NON_SMALL_CELL_LUNG_CANCER	KEGG	0.00447427	0.0108102	0.268
KEGG_GLYCEROPHOSPHOLIPID_METABOLISM	KEGG	0.00454545	0.0132428	0.364
KEGG_VALINE_LEUCINE_AND_ISOLEUCINE_DEGRADATION	KEGG	0.00473934	0.0177593	0.518
KEGG_GLYCOSPHINGOLIPID_BIOSYNTHESIS_GANGLIO_SERIES	KEGG	0.00493827	0.00537364	0.137
KEGG_VASCULAR_SMOOTH_MUSCLE_CONTRACTION	KEGG	0.00865801	0.0409229	0.869
KEGG_SPHINGOLIPID_METABOLISM	KEGG	0.00888889	0.0131434	0.346
KEGG_GLYCOSAMINOGLYCAN_BIOSYNTHESIS_CHONDROITIN_SULFATE	KEGG	0.00904977	0.0147373	0.41
KEGG_THYROID_CANCER	KEGG	0.00925926	0.013093	0.355
KEGG_PATHOGENIC_ESCHERICHIA_COLI_INFECTION	KEGG	0.0113895	0.0243269	0.658
KEGG_ABC_TRANSPORTERS	KEGG	0.011655	0.0133299	0.362
KEGG_GLYCOSPHINGOLIPID_BIOSYNTHESIS_LACTO_AND_NEOLACTO_SERIES	KEGG	0.0119617	0.0168692	0.487
KEGG_MTOR_SIGNALING_PATHWAY	KEGG	0.0136364	0.0256329	0.685
KEGG_GLYCOSAMINOGLYCAN_BIOSYNTHESIS_HEPARAN_SULFATE	KEGG	0.0140187	0.0185494	0.536
KEGG_BIOSYNTHESIS_OF_UNSATURATED_FATTY_ACIDS	KEGG	0.0143198	0.0184743	0.542
KEGG_MELANOMA	KEGG	0.0172786	0.0335828	0.797
KEGG_NOTCH_SIGNALING_PATHWAY	KEGG	0.0181818	0.0278762	0.716
KEGG_HYPERTROPHIC_CARDIOMYOPATHY_HCM	KEGG	0.0185185	0.0507618	0.937
KEGG_METABOLISM_OF_XENOBIOTICS_BY_CYTOCHROME_P450	KEGG	0.0196078	0.0483711	0.922
KEGG_GLYCEROLIPID_METABOLISM	KEGG	0.0214133	0.0310032	0.768
KEGG_BLADDER_CANCER	KEGG	0.025463	0.0524802	0.949
KEGG_ETHER_LIPID_METABOLISM	KEGG	0.0276498	0.0283413	0.726
KEGG_SELENOAMINO_ACID_METABOLISM	KEGG	0.0277136	0.0215821	0.61
KEGG_PROPANOATE_METABOLISM	KEGG	0.0323974	0.0398628	0.857
KEGG_PYRUVATE_METABOLISM	KEGG	0.0382979	0.0439478	0.893
KEGG_FC_EPSILON_RI_SIGNALING_PATHWAY	KEGG	0.0412844	0.0717209	0.988
KEGG_VEGF_SIGNALING_PATHWAY	KEGG	0.0454545	0.0815635	0.992
KEGG_BUTANOATE_METABOLISM	KEGG	0.0479303	0.0503461	0.938
KEGG_RIBOFLAVIN_METABOLISM	KEGG	0.0520362	0.0450246	0.903
KEGG_PENTOSE_AND_GLUCURONATE_INTERCONVERSIONS	KEGG	0.0556845	0.0422941	0.879
KEGG_RENAL_CELL_CARCINOMA	KEGG	0.0633188	0.0998492	0.998
KEGG_EPITHELIAL_CELL_SIGNALING_IN_HELICOBACTER_PYLORI_INFECTION	KEGG	0.0686499	0.110245	0.998
KEGG_LEISHMANIA_INFECTION	KEGG	0.0689655	0.116214	0.998
KEGG_CITRATE_CYCLE_TCA_CYCLE	KEGG	0.0743405	0.0486499	0.919
KEGG_ARGININE_AND_PROLINE_METABOLISM	KEGG	0.0805785	0.0941201	0.996
KEGG_NOD_LIKE_RECEPTOR_SIGNALING_PATHWAY	KEGG	0.0865801	0.117331	0.999
KEGG_CELL_ADHESION_MOLECULES_CAMS	KEGG	0.0980392	0.197226	1
KEGG_PENTOSE_PHOSPHATE_PATHWAY	KEGG	0.106095	0.098887	0.998
KEGG_ASCORBATE_AND_ALDARATE_METABOLISM	KEGG	0.115909	0.0982675	0.998
KEGG_OXIDATIVE_PHOSPHORYLATION	KEGG	0.123348	0.196051	1
KEGG_VIRAL_MYOCARDITIS	KEGG	0.124717	0.184102	1
KEGG_RNA_DEGRADATION	KEGG	0.12528	0.184872	1
KEGG_TGF_BETA_SIGNALING_PATHWAY	KEGG	0.133484	0.182094	1
KEGG_BASAL_TRANSCRIPTION_FACTORS	KEGG	0.138767	0.130698	1
KEGG_REGULATION_OF_AUTOPHAGY	KEGG	0.139434	0.149726	1
KEGG_PEROXISOME	KEGG	0.147321	0.181742	1
KEGG_PHENYLALANINE_METABOLISM	KEGG	0.152466	0.150606	1
KEGG_GLYCOLYSIS_GLUCONEOGENESIS	KEGG	0.15368	0.198328	1
KEGG_NATURAL_KILLER_CELL_MEDIATED_CYTOTOXICITY	KEGG	0.154185	0.233423	1
KEGG_PORPHYRIN_AND_CHLOROPHYLL_METABOLISM	KEGG	0.162162	0.183255	1
KEGG_HISTIDINE_METABOLISM	KEGG	0.199552	0.2049	1
KEGG_NICOTINATE_AND_NICOTINAMIDE_METABOLISM	KEGG	0.209412	0.212581	1
KEGG_CARDIAC_MUSCLE_CONTRACTION	KEGG	0.211581	0.233732	1
KEGG_ACUTE_MYELOID_LEUKEMIA	KEGG	0.233405	0.260811	1
KEGG_DORSO_VENTRAL_AXIS_FORMATION	KEGG	0.23516	0.206356	1
KEGG_CYTOSOLIC_DNA_SENSING_PATHWAY	KEGG	0.25	0.293409	1
KEGG_TRYPTOPHAN_METABOLISM	KEGG	0.335664	0.356065	1
KEGG_T_CELL_RECEPTOR_SIGNALING_PATHWAY	KEGG	0.341518	0.396068	1
KEGG_TOLL_LIKE_RECEPTOR_SIGNALING_PATHWAY	KEGG	0.345972	0.380181	1
KEGG_PARKINSONS_DISEASE	KEGG	0.357298	0.422399	1
KEGG_HEDGEHOG_SIGNALING_PATHWAY	KEGG	0.358696	0.395231	1
KEGG_PROTEIN_EXPORT	KEGG	0.379386	0.402311	1
KEGG_ALDOSTERONE_REGULATED_SODIUM_REABSORPTION	KEGG	0.409502	0.42508	1
KEGG_CYSTEINE_AND_METHIONINE_METABOLISM	KEGG	0.448357	0.482035	1
KEGG_PANTOTHENATE_AND_COA_BIOSYNTHESIS	KEGG	0.504329	0.543346	1
KEGG_BASAL_CELL_CARCINOMA	KEGG	0.539007	0.546568	1
KEGG_RIG_I_LIKE_RECEPTOR_SIGNALING_PATHWAY	KEGG	0.540909	0.590917	1
KEGG_TYPE_II_DIABETES_MELLITUS	KEGG	0.61435	0.652293	1
KEGG_RNA_POLYMERASE	KEGG	0.7051	0.775814	1
KEGG_SNARE_INTERACTIONS_IN_VESICULAR_TRANSPORT	KEGG	0.736607	0.739808	1
KEGG_PROTEASOME	KEGG	0.774123	0.785053	1
REACTOME_THE_ROLE_OF_NEF_IN_HIV1_REPLICATION_AND_DISEASE_PATHOGENESIS	REACTOME	0	1	0.268
REACTOME_O_LINKED_GLYCOSYLATION_OF_MUCINS	REACTOME	0	0.88516	0.351
REACTOME_NEF_MEDIATES_DOWN_MODULATION_OF_CELL_SURFACE_RECEPTORS_BY_RECRUITING_THEM_TO_CLATHRIN_ADAPTERS	REACTOME	0	0.63247	0.362
REACTOME_NEUROTRANSMITTER_RECEPTOR_BINDING_AND_DOWNSTREAM_TRANSMISSION_IN_THE_POSTSYNAPTIC_CELL	REACTOME	0	0.831208	0.511
REACTOME_TRAFFICKING_OF_AMPA_RECEPTORS	REACTOME	0	0.828793	0.603
REACTOME_L1CAM_INTERACTIONS	REACTOME	0	0.780122	0.618
REACTOME_AXON_GUIDANCE	REACTOME	0	0.695976	0.618
REACTOME_SEMAPHORIN_INTERACTIONS	REACTOME	0	0.650152	0.624
REACTOME_FACTORS_INVOLVED_IN_MEGAKARYOCYTE_DEVELOPMENT_AND_PLATELET_PRODUCTION	REACTOME	0	0.609318	0.66
REACTOME_MHC_CLASS_II_ANTIGEN_PRESENTATION	REACTOME	0	0.572845	0.683
REACTOME_SIGNALING_BY_RHO_GTPASES	REACTOME	0	0.524569	0.698
REACTOME_ERK_MAPK_TARGETS	REACTOME	0	0.506332	0.736
REACTOME_ACTIVATION_OF_NMDA_RECEPTOR_UPON_GLUTAMATE_BINDING_AND_POSTSYNAPTIC_EVENTS	REACTOME	0	0.532201	0.794
REACTOME_POST_NMDA_RECEPTOR_ACTIVATION_EVENTS	REACTOME	0	0.531818	0.8
REACTOME_KINESINS	REACTOME	0	0.614559	0.866
REACTOME_DEVELOPMENTAL_BIOLOGY	REACTOME	0	0.54251	0.889
REACTOME_CREB_PHOSPHORYLATION_THROUGH_THE_ACTIVATION_OF_RAS	REACTOME	0	0.503863	0.899
REACTOME_NUCLEAR_EVENTS_KINASE_AND_TRANSCRIPTION_FACTOR_ACTIVATION	REACTOME	0	0.400349	0.93
REACTOME_PHOSPHOLIPASE_C_MEDIATED_CASCADE	REACTOME	0	0.391484	0.96
REACTOME_LYSOSOME_VESICLE_BIOGENESIS	REACTOME	0.0019685	0.522631	0.758
REACTOME_P75_NTR_RECEPTOR_MEDIATED_SIGNALLING	REACTOME	0.003861	0.414005	0.929
REACTOME_G1_PHASE	REACTOME	0.00386847	0.598027	0.674
REACTOME_PYRUVATE_METABOLISM_AND_CITRIC_ACID_TCA_CYCLE	REACTOME	0.006	0.439352	0.908
REACTOME_CYCLIN_A_B1_ASSOCIATED_EVENTS_DURING_G2_M_TRANSITION	REACTOME	0.00606061	0.51269	0.709
REACTOME_RAS_ACTIVATION_UOPN_CA2_INFUX_THROUGH_NMDA_RECEPTOR	REACTOME	0.00632911	0.527231	0.824
REACTOME_INTERACTION_BETWEEN_L1_AND_ANKYRINS	REACTOME	0.00641026	0.746878	0.431
REACTOME_EFFECTS_OF_PIP2_HYDROLYSIS	REACTOME	0.00750469	0.48667	0.899
REACTOME_CELL_CYCLE	REACTOME	0.00803213	0.51864	0.816
REACTOME_REGULATION_OF_WATER_BALANCE_BY_RENAL_AQUAPORINS	REACTOME	0.00809717	0.402669	0.935
REACTOME_POST_TRANSLATIONAL_PROTEIN_MODIFICATION	REACTOME	0.00819672	0.525311	0.895
REACTOME_CELL_DEATH_SIGNALLING_VIA_NRAGE_NRIF_AND_NADE	REACTOME	0.00978474	0.396112	0.93
REACTOME_MITOTIC_PROMETAPHASE	REACTOME	0.010142	0.5161	0.899
REACTOME_G_ALPHA_Z_SIGNALLING_EVENTS	REACTOME	0.0117878	0.536429	0.895
REACTOME_SIGNALLING_BY_NGF	REACTOME	0.0118343	0.443759	0.908
REACTOME_REGULATION_OF_KIT_SIGNALING	REACTOME	0.0121704	0.478547	0.899
REACTOME_FATTY_ACYL_COA_BIOSYNTHESIS	REACTOME	0.012474	0.627773	0.864
REACTOME_E2F_MEDIATED_REGULATION_OF_DNA_REPLICATION	REACTOME	0.0140845	0.379329	0.938
REACTOME_SIGNALING_BY_FGFR	REACTOME	0.0157791	0.425023	0.927
REACTOME_METABOLISM_OF_CARBOHYDRATES	REACTOME	0.0160643	0.389407	0.961
REACTOME_G_ALPHA1213_SIGNALLING_EVENTS	REACTOME	0.0181452	0.414904	0.929
REACTOME_SEMA4D_IN_SEMAPHORIN_SIGNALING	REACTOME	0.0196078	0.59871	0.866
REACTOME_SRP_DEPENDENT_COTRANSLATIONAL_PROTEIN_TARGETING_TO_MEMBRANE	REACTOME	0.0199203	0.650303	0.652
REACTOME_SHC1_EVENTS_IN_ERBB4_SIGNALING	REACTOME	0.0199601	0.404676	0.934
REACTOME_TRANSMISSION_ACROSS_CHEMICAL_SYNAPSES	REACTOME	0.0206186	0.585837	0.875
REACTOME_CELL_JUNCTION_ORGANIZATION	REACTOME	0.0217391	0.449306	0.903
REACTOME_GABA_RECEPTOR_ACTIVATION	REACTOME	0.0238095	0.746393	0.533
REACTOME_DOWNSTREAM_SIGNALING_OF_ACTIVATED_FGFR	REACTOME	0.0238095	0.397049	0.96
REACTOME_CHROMOSOME_MAINTENANCE	REACTOME	0.0263692	0.494235	0.899
REACTOME_SIGNALING_BY_ERBB2	REACTOME	0.0273973	0.43367	0.913
REACTOME_NGF_SIGNALLING_VIA_TRKA_FROM_THE_PLASMA_MEMBRANE	REACTOME	0.0276134	0.407526	0.929
REACTOME_CELL_CELL_COMMUNICATION	REACTOME	0.0279441	0.381789	0.941
REACTOME_CELL_CYCLE_MITOTIC	REACTOME	0.0285714	0.449782	0.904
REACTOME_CREB_PHOSPHORYLATION_THROUGH_THE_ACTIVATION_OF_CAMKII	REACTOME	0.028866	0.424047	0.921
REACTOME_PYRUVATE_METABOLISM	REACTOME	0.03	0.427457	0.908
REACTOME_CHONDROITIN_SULFATE_BIOSYNTHESIS	REACTOME	0.0310559	0.512615	0.8
REACTOME_GRB2_EVENTS_IN_ERBB2_SIGNALING	REACTOME	0.03125	0.392212	0.968
REACTOME_BIOSYNTHESIS_OF_THE_N_GLYCAN_PRECURSOR_DOLICHOL_LIPID_LINKED_OLIGOSACCHARIDE_LLO_AND_TRANSFER_TO_A_NASCENT_PROTEIN	REACTOME	0.0318725	0.46996	0.9
REACTOME_DAG_AND_IP3_SIGNALING	REACTOME	0.032	0.400433	0.957
REACTOME_HEMOSTASIS	REACTOME	0.0324544	0.377825	0.973
REACTOME_AQUAPORIN_MEDIATED_TRANSPORT	REACTOME	0.034	0.381164	0.97
REACTOME_SIGNALING_BY_EGFR_IN_CANCER	REACTOME	0.0346154	0.458865	0.903
REACTOME_GLYCOSAMINOGLYCAN_METABOLISM	REACTOME	0.0350515	0.393844	0.93
REACTOME_REGULATION_OF_INSULIN_SECRETION	REACTOME	0.0352697	0.384747	0.97
REACTOME_MITOTIC_G2_G2_M_PHASES	REACTOME	0.0357853	0.404794	0.93
REACTOME_EGFR_DOWNREGULATION	REACTOME	0.036	0.39247	0.979
REACTOME_CHONDROITIN_SULFATE_DERMATAN_SULFATE_METABOLISM	REACTOME	0.0375	0.398474	0.968
REACTOME_REGULATION_OF_INSULIN_SECRETION_BY_GLUCAGON_LIKE_PEPTIDE1	REACTOME	0.0375783	0.383355	0.97
REACTOME_SIGNALLING_TO_RAS	REACTOME	0.0401606	0.393304	0.961
REACTOME_TRAFFICKING_OF_GLUR2_CONTAINING_AMPA_RECEPTORS	REACTOME	0.0410678	0.39187	0.96
REACTOME_GABA_B_RECEPTOR_ACTIVATION	REACTOME	0.04158	0.525541	0.779
REACTOME_HS_GAG_DEGRADATION	REACTOME	0.041841	0.431316	0.908
REACTOME_DEPOSITION_OF_NEW_CENPA_CONTAINING_NUCLEOSOMES_AT_THE_CENTROMERE	REACTOME	0.0438095	0.544767	0.777
REACTOME_KERATAN_SULFATE_KERATIN_METABOLISM	REACTOME	0.0439122	0.382817	0.961
REACTOME_RECRUITMENT_OF_MITOTIC_CENTROSOME_PROTEINS_AND_COMPLEXES	REACTOME	0.0442656	0.383217	0.938
REACTOME_NRAGE_SIGNALS_DEATH_THROUGH_JNK	REACTOME	0.0444444	0.394752	0.96
REACTOME_ASPARAGINE_N_LINKED_GLYCOSYLATION	REACTOME	0.045098	0.554572	0.875
REACTOME_MEIOSIS	REACTOME	0.0455408	0.520754	0.731
REACTOME_LOSS_OF_NLP_FROM_MITOTIC_CENTROSOMES	REACTOME	0.0478088	0.378955	0.938
REACTOME_DNA_REPLICATION	REACTOME	0.0482897	0.603934	0.875
REACTOME_CITRIC_ACID_CYCLE_TCA_CYCLE	REACTOME	0.05	0.399433	0.955
REACTOME_INSULIN_SYNTHESIS_AND_PROCESSING	REACTOME	0.0506823	0.382607	0.97
REACTOME_RECYCLING_PATHWAY_OF_L1	REACTOME	0.0507812	0.377185	0.941
REACTOME_BASIGIN_INTERACTIONS	REACTOME	0.0511811	0.39625	0.968
REACTOME_MITOTIC_M_M_G1_PHASES	REACTOME	0.0527383	0.46294	0.901
REACTOME_SIGNALING_BY_FGFR_IN_DISEASE	REACTOME	0.0542636	0.386322	0.961
REACTOME_MAPK_TARGETS_NUCLEAR_EVENTS_MEDIATED_BY_MAP_KINASES	REACTOME	0.0544747	0.387008	0.979
REACTOME_TRANSMEMBRANE_TRANSPORT_OF_SMALL_MOLECULES	REACTOME	0.0557769	0.410234	1
REACTOME_ACTIVATION_OF_CHAPERONE_GENES_BY_XBP1S	REACTOME	0.056	0.438182	0.913
REACTOME_PKA_MEDIATED_PHOSPHORYLATION_OF_CREB	REACTOME	0.0567515	0.400094	0.96
REACTOME_KERATAN_SULFATE_BIOSYNTHESIS	REACTOME	0.0570866	0.405003	0.957
REACTOME_NCAM_SIGNALING_FOR_NEURITE_OUT_GROWTH	REACTOME	0.0615711	0.569561	0.875
REACTOME_NUCLEOTIDE_BINDING_DOMAIN_LEUCINE_RICH_REPEAT_CONTAINING_RECEPTOR_NLR_SIGNALING_PATHWAYS	REACTOME	0.0634921	0.416608	1
REACTOME_MEIOTIC_RECOMBINATION	REACTOME	0.0650096	0.558779	0.697
REACTOME_SEMA4D_INDUCED_CELL_MIGRATION_AND_GROWTH_CONE_COLLAPSE	REACTOME	0.0656064	0.394208	0.97
REACTOME_G1_S_SPECIFIC_TRANSCRIPTION	REACTOME	0.0661323	0.392376	0.968
REACTOME_APOPTOTIC_CLEAVAGE_OF_CELLULAR_PROTEINS	REACTOME	0.0669216	0.394833	0.936
REACTOME_GLYCOSPHINGOLIPID_METABOLISM	REACTOME	0.0681363	0.391721	0.936
REACTOME_SYNTHESIS_AND_INTERCONVERSION_OF_NUCLEOTIDE_DI_AND_TRIPHOSPHATES	REACTOME	0.0686275	0.388351	0.938
REACTOME_SMOOTH_MUSCLE_CONTRACTION	REACTOME	0.0718447	0.411258	0.954
REACTOME_CA_DEPENDENT_EVENTS	REACTOME	0.0734127	0.394078	0.968
REACTOME_TCA_CYCLE_AND_RESPIRATORY_ELECTRON_TRANSPORT	REACTOME	0.0761523	0.396988	0.935
REACTOME_APC_CDC20_MEDIATED_DEGRADATION_OF_NEK2A	REACTOME	0.0783133	0.39357	0.957
REACTOME_OPIOID_SIGNALLING	REACTOME	0.0802469	0.389814	0.979
REACTOME_MITOTIC_G1_G1_S_PHASES	REACTOME	0.083503	0.421325	0.929
REACTOME_SIGNALING_BY_PDGF	REACTOME	0.084	0.387174	0.97
REACTOME_APC_C_CDC20_MEDIATED_DEGRADATION_OF_CYCLIN_B	REACTOME	0.0855397	0.381768	0.97
REACTOME_POST_CHAPERONIN_TUBULIN_FOLDING_PATHWAY	REACTOME	0.086785	0.380758	0.973
REACTOME_REGULATION_OF_MITOTIC_CELL_CYCLE	REACTOME	0.093254	0.523097	0.897
REACTOME_FRS2_MEDIATED_CASCADE	REACTOME	0.0940695	0.385479	0.979
REACTOME_PHOSPHORYLATION_OF_THE_APC_C	REACTOME	0.097166	0.378742	0.976
REACTOME_TELOMERE_MAINTENANCE	REACTOME	0.0990291	0.388413	0.938
REACTOME_FORMATION_OF_ATP_BY_CHEMIOSMOTIC_COUPLING	REACTOME	0.0994036	0.416868	1
REACTOME_A_TETRASACCHARIDE_LINKER_SEQUENCE_IS_REQUIRED_FOR_GAG_SYNTHESIS	REACTOME	0.0997877	0.402707	0.954
REACTOME_PLC_BETA_MEDIATED_EVENTS	REACTOME	0.0997963	0.389892	0.985
REACTOME_G1_S_TRANSITION	REACTOME	0.101215	0.37534	0.945
REACTOME_INTEGRIN_CELL_SURFACE_INTERACTIONS	REACTOME	0.101626	0.378054	0.97
REACTOME_ABC_FAMILY_PROTEINS_MEDIATED_TRANSPORT	REACTOME	0.101761	0.371731	0.976
REACTOME_FORMATION_OF_INCISION_COMPLEX_IN_GG_NER	REACTOME	0.104126	0.38361	0.97
REACTOME_METABOLISM_OF_PROTEINS	REACTOME	0.105263	0.40049	0.953
REACTOME_TRANSPORT_OF_INORGANIC_CATIONS_ANIONS_AND_AMINO_ACIDS_OLIGOPEPTIDES	REACTOME	0.107422	0.396244	0.996
REACTOME_TRIGLYCERIDE_BIOSYNTHESIS	REACTOME	0.109344	0.389611	0.979
REACTOME_SIGNAL_TRANSDUCTION_BY_L1	REACTOME	0.112403	0.392597	0.968
REACTOME_INHIBITION_OF_VOLTAGE_GATED_CA2_CHANNELS_VIA_GBETA_GAMMA_SUBUNITS	REACTOME	0.112766	0.411874	0.929
REACTOME_COLLAGEN_FORMATION	REACTOME	0.113924	0.552762	0.883
REACTOME_PI3K_EVENTS_IN_ERBB4_SIGNALING	REACTOME	0.11412	0.406715	1
REACTOME_CELL_CYCLE_CHECKPOINTS	REACTOME	0.115854	0.376615	0.946
REACTOME_INTEGRATION_OF_ENERGY_METABOLISM	REACTOME	0.118126	0.415283	1
REACTOME_PRE_NOTCH_EXPRESSION_AND_PROCESSING	REACTOME	0.118236	0.382545	0.977
REACTOME_GLOBAL_GENOMIC_NER_GG_NER	REACTOME	0.119192	0.39468	0.968
REACTOME_SPHINGOLIPID_METABOLISM	REACTOME	0.11976	0.376679	0.976
REACTOME_SIGNALING_BY_ROBO_RECEPTOR	REACTOME	0.128599	0.396966	0.982
REACTOME_MAP_KINASE_ACTIVATION_IN_TLR_CASCADE	REACTOME	0.130178	0.397985	0.985
REACTOME_DIABETES_PATHWAYS	REACTOME	0.130859	0.413054	1
REACTOME_G0_AND_EARLY_G1	REACTOME	0.132114	0.391063	0.979
REACTOME_POST_TRANSLATIONAL_MODIFICATION_SYNTHESIS_OF_GPI_ANCHORED_PROTEINS	REACTOME	0.133733	0.379427	0.961
REACTOME_PRE_NOTCH_TRANSCRIPTION_AND_TRANSLATION	REACTOME	0.134122	0.385786	0.97
REACTOME_CELL_SURFACE_INTERACTIONS_AT_THE_VASCULAR_WALL	REACTOME	0.134538	0.408244	1
REACTOME_NEURONAL_SYSTEM	REACTOME	0.136752	0.391194	0.985
REACTOME_SIGNALLING_TO_ERKS	REACTOME	0.138728	0.39892	0.994
REACTOME_TIGHT_JUNCTION_INTERACTIONS	REACTOME	0.138889	0.390873	0.979
REACTOME_RNA_POL_I_TRANSCRIPTION	REACTOME	0.140078	0.396558	0.968
REACTOME_ION_TRANSPORT_BY_P_TYPE_ATPASES	REACTOME	0.140816	0.410581	1
REACTOME_APOPTOTIC_EXECUTION_PHASE	REACTOME	0.140927	0.374212	0.976
REACTOME_RNA_POL_I_PROMOTER_OPENING	REACTOME	0.142578	0.428786	0.913
REACTOME_SIGNALING_BY_SCF_KIT	REACTOME	0.142857	0.395003	0.984
REACTOME_INHIBITION_OF_THE_PROTEOLYTIC_ACTIVITY_OF_APC_C_REQUIRED_FOR_THE_ONSET_OF_ANAPHASE_BY_MITOTIC_SPINDLE_CHECKPOINT_COMPONENTS	REACTOME	0.145161	0.374679	0.976
REACTOME_GLUTATHIONE_CONJUGATION	REACTOME	0.146	0.397845	0.957
REACTOME_INHIBITION_OF_INSULIN_SECRETION_BY_ADRENALINE_NORADRENALINE	REACTOME	0.146444	0.39706	0.985
REACTOME_PEPTIDE_CHAIN_ELONGATION	REACTOME	0.148	0.409093	1
REACTOME_ADHERENS_JUNCTIONS_INTERACTIONS	REACTOME	0.14876	0.390985	0.97
REACTOME_ADP_SIGNALLING_THROUGH_P2RY12	REACTOME	0.149284	0.399149	0.993
REACTOME_FORMATION_OF_TUBULIN_FOLDING_INTERMEDIATES_BY_CCT_TRIC	REACTOME	0.151456	0.382184	0.973
REACTOME_SYNTHESIS_OF_DNA	REACTOME	0.154309	0.384762	0.963
REACTOME_GLYCOGEN_BREAKDOWN_GLYCOGENOLYSIS	REACTOME	0.156556	0.394887	0.982
REACTOME_DARPP_32_EVENTS	REACTOME	0.157791	0.406362	0.954
REACTOME_G2_M_CHECKPOINTS	REACTOME	0.159596	0.390377	0.979
REACTOME_HS_GAG_BIOSYNTHESIS	REACTOME	0.161885	0.372365	0.976
REACTOME_PROCESSIVE_SYNTHESIS_ON_THE_LAGGING_STRAND	REACTOME	0.162978	0.400372	0.985
REACTOME_GLUCAGON_SIGNALING_IN_METABOLIC_REGULATION	REACTOME	0.163306	0.406701	1
REACTOME_ACTIVATION_OF_THE_PRE_REPLICATIVE_COMPLEX	REACTOME	0.169697	0.390754	0.985
REACTOME_NEPHRIN_INTERACTIONS	REACTOME	0.17004	0.413251	1
REACTOME_PHASE_II_CONJUGATION	REACTOME	0.170341	0.384118	0.97
REACTOME_DNA_STRAND_ELONGATION	REACTOME	0.172065	0.39593	0.99
REACTOME_THROMBIN_SIGNALLING_THROUGH_PROTEINASE_ACTIVATED_RECEPTORS_PARS	REACTOME	0.172549	0.415229	1
REACTOME_G_PROTEIN_ACTIVATION	REACTOME	0.173469	0.416587	1
REACTOME_TRAF6_MEDIATED_INDUCTION_OF_NFKB_AND_MAP_KINASES_UPON_TLR7_8_OR_9_ACTIVATION	REACTOME	0.175676	0.414575	1
REACTOME_MUSCLE_CONTRACTION	REACTOME	0.175758	0.42524	1
REACTOME_OTHER_SEMAPHORIN_INTERACTIONS	REACTOME	0.178794	0.380804	0.973
REACTOME_ACTIVATION_OF_ATR_IN_RESPONSE_TO_REPLICATION_STRESS	REACTOME	0.178862	0.394452	0.985
REACTOME_HEPARAN_SULFATE_HEPARIN_HS_GAG_METABOLISM	REACTOME	0.182952	0.390141	0.979
REACTOME_PI3K_EVENTS_IN_ERBB2_SIGNALING	REACTOME	0.188571	0.414601	1
REACTOME_EXTENSION_OF_TELOMERES	REACTOME	0.19	0.392954	0.984
REACTOME_TRIF_MEDIATED_TLR3_SIGNALING	REACTOME	0.192607	0.416348	1
REACTOME_MYD88_MAL_CASCADE_INITIATED_ON_PLASMA_MEMBRANE	REACTOME	0.194981	0.430071	1
REACTOME_NFKB_AND_MAP_KINASES_ACTIVATION_MEDIATED_BY_TLR4_SIGNALING_REPERTOIRE	REACTOME	0.195029	0.423344	1
REACTOME_ENOS_ACTIVATION_AND_REGULATION	REACTOME	0.196078	0.400437	0.99
REACTOME_CELL_CELL_JUNCTION_ORGANIZATION	REACTOME	0.198413	0.387213	0.985
REACTOME_RESOLUTION_OF_AP_SITES_VIA_THE_MULTIPLE_NUCLEOTIDE_PATCH_REPLACEMENT_PATHWAY	REACTOME	0.199597	0.401726	0.985
REACTOME_MEMBRANE_TRAFFICKING	REACTOME	0.201566	0.397149	0.995
REACTOME_SIGNALLING_TO_P38_VIA_RIT_AND_RIN	REACTOME	0.20339	0.395273	0.995
REACTOME_ACTIVATED_NOTCH1_TRANSMITS_SIGNAL_TO_THE_NUCLEUS	REACTOME	0.203522	0.411633	1
REACTOME_BRANCHED_CHAIN_AMINO_ACID_CATABOLISM	REACTOME	0.204124	0.410413	1
REACTOME_CONVERSION_FROM_APC_C_CDC20_TO_APC_C_CDH1_IN_LATE_ANAPHASE	REACTOME	0.204409	0.394136	0.985
REACTOME_GAB1_SIGNALOSOME	REACTOME	0.204633	0.402014	0.99
REACTOME_PIP3_ACTIVATES_AKT_SIGNALING	REACTOME	0.204981	0.412329	1
REACTOME_ABCA_TRANSPORTERS_IN_LIPID_HOMEOSTASIS	REACTOME	0.205941	0.410955	1
REACTOME_CTLA4_INHIBITORY_SIGNALING	REACTOME	0.20751	0.416814	1
REACTOME_APOPTOSIS	REACTOME	0.207692	0.388357	0.97
REACTOME_TERMINATION_OF_O_GLYCAN_BIOSYNTHESIS	REACTOME	0.208421	0.41258	1
REACTOME_SIGNAL_AMPLIFICATION	REACTOME	0.209776	0.42697	1
REACTOME_S_PHASE	REACTOME	0.212851	0.379821	0.973
REACTOME_GLYCEROPHOSPHOLIPID_BIOSYNTHESIS	REACTOME	0.213018	0.417378	1
REACTOME_SIGNALING_BY_INSULIN_RECEPTOR	REACTOME	0.213873	0.411104	1
REACTOME_MEIOTIC_SYNAPSIS	REACTOME	0.2147	0.39621	0.994
REACTOME_HOMOLOGOUS_RECOMBINATION_REPAIR_OF_REPLICATION_INDEPENDENT_DOUBLE_STRAND_BREAKS	REACTOME	0.216599	0.39591	0.982
REACTOME_NETRIN1_SIGNALING	REACTOME	0.217899	0.459621	1
REACTOME_SHC_MEDIATED_SIGNALLING	REACTOME	0.220472	0.384376	0.979
REACTOME_AMYLOIDS	REACTOME	0.222004	0.388333	0.985
REACTOME_PACKAGING_OF_TELOMERE_ENDS	REACTOME	0.223077	0.394683	0.995
REACTOME_MYOGENESIS	REACTOME	0.224949	0.431302	1
REACTOME_PLATELET_HOMEOSTASIS	REACTOME	0.226069	0.440402	1
REACTOME_DNA_REPAIR	REACTOME	0.227364	0.385613	0.977
REACTOME_MITOCHONDRIAL_TRNA_AMINOACYLATION	REACTOME	0.227626	0.382893	0.979
REACTOME_PLATELET_ACTIVATION_SIGNALING_AND_AGGREGATION	REACTOME	0.227626	0.476446	1
REACTOME_BASE_EXCISION_REPAIR	REACTOME	0.229039	0.395796	0.985
REACTOME_ION_CHANNEL_TRANSPORT	REACTOME	0.229084	0.413242	1
REACTOME_EXTRACELLULAR_MATRIX_ORGANIZATION	REACTOME	0.229474	0.397962	0.982
REACTOME_DOUBLE_STRAND_BREAK_REPAIR	REACTOME	0.234694	0.392774	0.985
REACTOME_UNFOLDED_PROTEIN_RESPONSE	REACTOME	0.237052	0.414357	1
REACTOME_PHOSPHOLIPID_METABOLISM	REACTOME	0.240704	0.39752	0.994
REACTOME_ACTIVATION_OF_KAINATE_RECEPTORS_UPON_GLUTAMATE_BINDING	REACTOME	0.242236	0.429523	1
REACTOME_IL_2_SIGNALING	REACTOME	0.242661	0.470908	1
REACTOME_LAGGING_STRAND_SYNTHESIS	REACTOME	0.243461	0.403322	1
REACTOME_GABA_SYNTHESIS_RELEASE_REUPTAKE_AND_DEGRADATION	REACTOME	0.248421	0.428331	1
REACTOME_FANCONI_ANEMIA_PATHWAY	REACTOME	0.25	0.387493	0.985
REACTOME_NEGATIVE_REGULATION_OF_FGFR_SIGNALING	REACTOME	0.25	0.485456	1
REACTOME_TRNA_AMINOACYLATION	REACTOME	0.251462	0.389433	0.979
REACTOME_SHC_RELATED_EVENTS	REACTOME	0.256461	0.413558	1
REACTOME_PREFOLDIN_MEDIATED_TRANSFER_OF_SUBSTRATE_TO_CCT_TRIC	REACTOME	0.258126	0.410267	1
REACTOME_GAP_JUNCTION_TRAFFICKING	REACTOME	0.265385	0.472476	1
REACTOME_NITRIC_OXIDE_STIMULATES_GUANYLATE_CYCLASE	REACTOME	0.266529	0.441053	1
REACTOME_SYNTHESIS_OF_GLYCOSYLPHOSPHATIDYLINOSITOL_GPI	REACTOME	0.267068	0.398063	0.994
REACTOME_NUCLEOTIDE_EXCISION_REPAIR	REACTOME	0.269076	0.400492	0.99
REACTOME_ORC1_REMOVAL_FROM_CHROMATIN	REACTOME	0.269841	0.400195	0.985
REACTOME_ACTIVATED_TLR4_SIGNALLING	REACTOME	0.270633	0.497106	1
REACTOME_GASTRIN_CREB_SIGNALLING_PATHWAY_VIA_PKC_AND_MAPK	REACTOME	0.276639	0.497773	1
REACTOME_PI_3K_CASCADE	REACTOME	0.27767	0.498553	1
REACTOME_DOWNSTREAM_SIGNAL_TRANSDUCTION	REACTOME	0.27821	0.413149	1
REACTOME_CGMP_EFFECTS	REACTOME	0.279208	0.475718	1
REACTOME_ADP_SIGNALLING_THROUGH_P2RY1	REACTOME	0.279352	0.481783	1
REACTOME_SHC1_EVENTS_IN_EGFR_SIGNALING	REACTOME	0.290566	0.4189	1
REACTOME_GPVI_MEDIATED_ACTIVATION_CASCADE	REACTOME	0.295775	0.472798	1
REACTOME_INSULIN_RECEPTOR_RECYCLING	REACTOME	0.297456	0.438684	1
REACTOME_SIGNALING_BY_ERBB4	REACTOME	0.298651	0.485658	1
REACTOME_APC_C_CDH1_MEDIATED_DEGRADATION_OF_CDC20_AND_OTHER_APC_C_CDH1_TARGETED_PROTEINS_IN_LATE_MITOSIS_EARLY_G1	REACTOME	0.302144	0.408604	1
REACTOME_APC_C_CDC20_MEDIATED_DEGRADATION_OF_MITOTIC_PROTEINS	REACTOME	0.302554	0.398175	0.996
REACTOME_INWARDLY_RECTIFYING_K_CHANNELS	REACTOME	0.304069	0.482639	1
REACTOME_NUCLEOTIDE_LIKE_PURINERGIC_RECEPTORS	REACTOME	0.307229	0.473936	1
REACTOME_INSULIN_RECEPTOR_SIGNALLING_CASCADE	REACTOME	0.30754	0.464075	1
REACTOME_PROTEIN_FOLDING	REACTOME	0.310606	0.436393	1
REACTOME_G_BETA_GAMMA_SIGNALLING_THROUGH_PI3KGAMMA	REACTOME	0.311111	0.497301	1
REACTOME_HOST_INTERACTIONS_OF_HIV_FACTORS	REACTOME	0.314852	0.405375	1
REACTOME_INTRINSIC_PATHWAY_FOR_APOPTOSIS	REACTOME	0.315582	0.443127	1
REACTOME_ANTIGEN_ACTIVATES_B_CELL_RECEPTOR_LEADING_TO_GENERATION_OF_SECOND_MESSENGERS	REACTOME	0.320463	0.497721	1
REACTOME_RNA_POL_I_RNA_POL_III_AND_MITOCHONDRIAL_TRANSCRIPTION	REACTOME	0.320866	0.430492	1
REACTOME_SIGNALING_BY_NOTCH	REACTOME	0.323017	0.435801	1
REACTOME_RESPIRATORY_ELECTRON_TRANSPORT_ATP_SYNTHESIS_BY_CHEMIOSMOTIC_COUPLING_AND_HEAT_PRODUCTION_BY_UNCOUPLING_PROTEINS_	REACTOME	0.33004	0.483338	1
REACTOME_MRNA_CAPPING	REACTOME	0.331395	0.414705	1
REACTOME_YAP1_AND_WWTR1_TAZ_STIMULATED_GENE_EXPRESSION	REACTOME	0.333984	0.473567	1
REACTOME_M_G1_TRANSITION	REACTOME	0.337374	0.409262	1
REACTOME_TRANSCRIPTION_COUPLED_NER_TC_NER	REACTOME	0.337945	0.416446	1
REACTOME_CYTOSOLIC_TRNA_AMINOACYLATION	REACTOME	0.34	0.430015	1
REACTOME_SLC_MEDIATED_TRANSMEMBRANE_TRANSPORT	REACTOME	0.345029	0.547294	1
REACTOME_INFLUENZA_VIRAL_RNA_TRANSCRIPTION_AND_REPLICATION	REACTOME	0.347913	0.482948	1
REACTOME_NCAM1_INTERACTIONS	REACTOME	0.349892	0.477504	1
REACTOME_METABOLISM_OF_NUCLEOTIDES	REACTOME	0.350101	0.412232	1
REACTOME_CLASS_I_MHC_MEDIATED_ANTIGEN_PROCESSING_PRESENTATION	REACTOME	0.358238	0.437204	1
REACTOME_LATENT_INFECTION_OF_HOMO_SAPIENS_WITH_MYCOBACTERIUM_TUBERCULOSIS	REACTOME	0.36	0.518421	1
REACTOME_ANTIVIRAL_MECHANISM_BY_IFN_STIMULATED_GENES	REACTOME	0.36692	0.41342	1
REACTOME_UNBLOCKING_OF_NMDA_RECEPTOR_GLUTAMATE_BINDING_AND_ACTIVATION	REACTOME	0.368653	0.549692	1
REACTOME_PEROXISOMAL_LIPID_METABOLISM	REACTOME	0.368737	0.475332	1
REACTOME_ARMS_MEDIATED_ACTIVATION	REACTOME	0.370722	0.546754	1
REACTOME_ANTIGEN_PROCESSING_UBIQUITINATION_PROTEASOME_DEGRADATION	REACTOME	0.371648	0.442036	1
REACTOME_GOLGI_ASSOCIATED_VESICLE_BIOGENESIS	REACTOME	0.372549	0.411604	1
REACTOME_NOD1_2_SIGNALING_PATHWAY	REACTOME	0.374753	0.51715	1
REACTOME_GLUCOSE_METABOLISM	REACTOME	0.376953	0.490205	1
REACTOME_TRANS_GOLGI_NETWORK_VESICLE_BUDDING	REACTOME	0.390625	0.411961	1
REACTOME_SYNTHESIS_OF_PA	REACTOME	0.396	0.565046	1
REACTOME_ASSEMBLY_OF_THE_PRE_REPLICATIVE_COMPLEX	REACTOME	0.396794	0.443818	1
REACTOME_PI3K_AKT_ACTIVATION	REACTOME	0.401942	0.526816	1
REACTOME_SYNTHESIS_OF_PC	REACTOME	0.403475	0.548435	1
REACTOME_GLUCOSE_TRANSPORT	REACTOME	0.408	0.484172	1
REACTOME_PI3K_CASCADE	REACTOME	0.413861	0.563479	1
REACTOME_ACYL_CHAIN_REMODELLING_OF_PC	REACTOME	0.415354	0.596457	1
REACTOME_SCFSKP2_MEDIATED_DEGRADATION_OF_P27_P21	REACTOME	0.418738	0.501492	1
REACTOME_PROSTACYCLIN_SIGNALLING_THROUGH_PROSTACYCLIN_RECEPTOR	REACTOME	0.42029	0.578656	1
REACTOME_METABOLISM_OF_LIPIDS_AND_LIPOPROTEINS	REACTOME	0.421471	0.571662	1
REACTOME_INTEGRIN_ALPHAIIB_BETA3_SIGNALING	REACTOME	0.426615	0.581363	1
REACTOME_IL_RECEPTOR_SHC_SIGNALING	REACTOME	0.426901	0.583146	1
REACTOME_P53_DEPENDENT_G1_DNA_DAMAGE_RESPONSE	REACTOME	0.427203	0.555349	1
REACTOME_TOLL_RECEPTOR_CASCADES	REACTOME	0.428571	0.601891	1
REACTOME_SYNTHESIS_OF_PIPS_AT_THE_PLASMA_MEMBRANE	REACTOME	0.429672	0.549622	1
REACTOME_HIV_INFECTION	REACTOME	0.431102	0.485081	1
REACTOME_G_BETA_GAMMA_SIGNALLING_THROUGH_PLC_BETA	REACTOME	0.432099	0.598499	1
REACTOME_THROMBOXANE_SIGNALLING_THROUGH_TP_RECEPTOR	REACTOME	0.438976	0.628812	1
REACTOME_SPHINGOLIPID_DE_NOVO_BIOSYNTHESIS	REACTOME	0.439689	0.574075	1
REACTOME_PKB_MEDIATED_EVENTS	REACTOME	0.445736	0.500273	1
REACTOME_PURINE_METABOLISM	REACTOME	0.447106	0.442317	1
REACTOME_NEUROTRANSMITTER_RELEASE_CYCLE	REACTOME	0.45	0.624236	1
REACTOME_TRANSFERRIN_ENDOCYTOSIS_AND_RECYCLING	REACTOME	0.450397	0.54837	1
REACTOME_G_PROTEIN_BETA_GAMMA_SIGNALLING	REACTOME	0.451417	0.586327	1
REACTOME_RESPIRATORY_ELECTRON_TRANSPORT	REACTOME	0.455969	0.571747	1
REACTOME_INFLAMMASOMES	REACTOME	0.460606	0.599135	1
REACTOME_P130CAS_LINKAGE_TO_MAPK_SIGNALING_FOR_INTEGRINS	REACTOME	0.462572	0.589769	1
REACTOME_PI_METABOLISM	REACTOME	0.463602	0.515771	1
REACTOME_PROLONGED_ERK_ACTIVATION_EVENTS	REACTOME	0.471805	0.606805	1
REACTOME_3_UTR_MEDIATED_TRANSLATIONAL_REGULATION	REACTOME	0.47495	0.576041	1
REACTOME_TRANSPORT_OF_MATURE_MRNA_DERIVED_FROM_AN_INTRONLESS_TRANSCRIPT	REACTOME	0.478175	0.519791	1
REACTOME_REGULATORY_RNA_PATHWAYS	REACTOME	0.47929	0.526105	1
REACTOME_CYCLIN_E_ASSOCIATED_EVENTS_DURING_G1_S_TRANSITION_	REACTOME	0.479532	0.580866	1
REACTOME_G_ALPHA_Q_SIGNALLING_EVENTS	REACTOME	0.479592	0.632565	1
REACTOME_TRANSPORT_TO_THE_GOLGI_AND_SUBSEQUENT_MODIFICATION	REACTOME	0.481409	0.585737	1
REACTOME_PROTEOLYTIC_CLEAVAGE_OF_SNARE_COMPLEX_PROTEINS	REACTOME	0.481836	0.598016	1
REACTOME_REGULATION_OF_APOPTOSIS	REACTOME	0.483748	0.574648	1
REACTOME_NONSENSE_MEDIATED_DECAY_ENHANCED_BY_THE_EXON_JUNCTION_COMPLEX	REACTOME	0.491124	0.598802	1
REACTOME_NEP_NS2_INTERACTS_WITH_THE_CELLULAR_EXPORT_MACHINERY	REACTOME	0.492248	0.527021	1
REACTOME_FORMATION_OF_THE_HIV1_EARLY_ELONGATION_COMPLEX	REACTOME	0.496078	0.574245	1
REACTOME_AMINO_ACID_TRANSPORT_ACROSS_THE_PLASMA_MEMBRANE	REACTOME	0.497076	0.614403	1
REACTOME_SIGNALING_BY_ILS	REACTOME	0.502879	0.628197	1
REACTOME_INTERFERON_SIGNALING	REACTOME	0.503922	0.633951	1
REACTOME_GLUTAMATE_NEUROTRANSMITTER_RELEASE_CYCLE	REACTOME	0.504049	0.657722	1
REACTOME_INTERACTIONS_OF_VPR_WITH_HOST_CELLULAR_PROTEINS	REACTOME	0.507042	0.525186	1
REACTOME_CD28_CO_STIMULATION	REACTOME	0.522682	0.655821	1
REACTOME_PRE_NOTCH_PROCESSING_IN_GOLGI	REACTOME	0.523904	0.632925	1
REACTOME_MRNA_SPLICING_MINOR_PATHWAY	REACTOME	0.529058	0.669924	1
REACTOME_TRANSCRIPTION	REACTOME	0.529175	0.655075	1
REACTOME_GLUCAGON_TYPE_LIGAND_RECEPTORS	REACTOME	0.531496	0.66144	1
REACTOME_N_GLYCAN_ANTENNAE_ELONGATION_IN_THE_MEDIAL_TRANS_GOLGI	REACTOME	0.536204	0.625095	1
REACTOME_TRANSPORT_OF_RIBONUCLEOPROTEINS_INTO_THE_HOST_NUCLEUS	REACTOME	0.546875	0.574546	1
REACTOME_CDT1_ASSOCIATION_WITH_THE_CDC6_ORC_ORIGIN_COMPLEX	REACTOME	0.548134	0.627881	1
REACTOME_ACTIVATED_AMPK_STIMULATES_FATTY_ACID_OXIDATION_IN_MUSCLE	REACTOME	0.550696	0.630686	1
REACTOME_REGULATION_OF_GLUCOKINASE_BY_GLUCOKINASE_REGULATORY_PROTEIN	REACTOME	0.554902	0.630923	1
REACTOME_PLATELET_SENSITIZATION_BY_LDL	REACTOME	0.555102	0.651004	1
REACTOME_P53_INDEPENDENT_G1_S_DNA_DAMAGE_CHECKPOINT	REACTOME	0.55534	0.659546	1
REACTOME_SULFUR_AMINO_ACID_METABOLISM	REACTOME	0.558	0.653045	1
REACTOME_ACTIVATION_OF_THE_MRNA_UPON_BINDING_OF_THE_CAP_BINDING_COMPLEX_AND_EIFS_AND_SUBSEQUENT_BINDING_TO_43S	REACTOME	0.559387	0.647267	1
REACTOME_SCF_BETA_TRCP_MEDIATED_DEGRADATION_OF_EMI1	REACTOME	0.559687	0.651401	1
REACTOME_PLATELET_AGGREGATION_PLUG_FORMATION	REACTOME	0.563218	0.636558	1
REACTOME_G_ALPHA_I_SIGNALLING_EVENTS	REACTOME	0.56701	0.661106	1
REACTOME_COSTIMULATION_BY_THE_CD28_FAMILY	REACTOME	0.567729	0.655872	1
REACTOME_ENERGY_DEPENDENT_REGULATION_OF_MTOR_BY_LKB1_AMPK	REACTOME	0.569767	0.659588	1
REACTOME_FATTY_ACID_TRIACYLGLYCEROL_AND_KETONE_BODY_METABOLISM	REACTOME	0.57	0.651292	1
REACTOME_FORMATION_OF_THE_TERNARY_COMPLEX_AND_SUBSEQUENTLY_THE_43S_COMPLEX	REACTOME	0.572565	0.658241	1
REACTOME_GRB2_SOS_PROVIDES_LINKAGE_TO_MAPK_SIGNALING_FOR_INTERGRINS_	REACTOME	0.574713	0.657491	1
REACTOME_TRANSLATION	REACTOME	0.574803	0.658068	1
REACTOME_SIGNALING_BY_NOTCH1	REACTOME	0.576172	0.65234	1
REACTOME_ZINC_TRANSPORTERS	REACTOME	0.576172	0.671453	1
REACTOME_INFLUENZA_LIFE_CYCLE	REACTOME	0.576846	0.653268	1
REACTOME_ACTIVATION_OF_BH3_ONLY_PROTEINS	REACTOME	0.577909	0.654467	1
REACTOME_HIV_LIFE_CYCLE	REACTOME	0.579681	0.668566	1
REACTOME_METABOLISM_OF_NON_CODING_RNA	REACTOME	0.580897	0.659708	1
REACTOME_TRANSPORT_OF_MATURE_TRANSCRIPT_TO_CYTOPLASM	REACTOME	0.581349	0.664668	1
REACTOME_CYTOKINE_SIGNALING_IN_IMMUNE_SYSTEM	REACTOME	0.587209	0.672013	1
REACTOME_RNA_POL_II_TRANSCRIPTION_PRE_INITIATION_AND_PROMOTER_OPENING	REACTOME	0.588694	0.676916	1
REACTOME_MITOCHONDRIAL_PROTEIN_IMPORT	REACTOME	0.596078	0.710783	1
REACTOME_ASSOCIATION_OF_TRIC_CCT_WITH_TARGET_PROTEINS_DURING_BIOSYNTHESIS	REACTOME	0.596117	0.661722	1
REACTOME_ER_PHAGOSOME_PATHWAY	REACTOME	0.603416	0.671912	1
REACTOME_FORMATION_OF_TRANSCRIPTION_COUPLED_NER_TC_NER_REPAIR_COMPLEX	REACTOME	0.604607	0.696712	1
REACTOME_MICRORNA_MIRNA_BIOGENESIS	REACTOME	0.613095	0.684578	1
REACTOME_SIGNALING_BY_THE_B_CELL_RECEPTOR_BCR	REACTOME	0.615679	0.698505	1
REACTOME_IRON_UPTAKE_AND_TRANSPORT	REACTOME	0.615686	0.707968	1
REACTOME_AUTODEGRADATION_OF_CDH1_BY_CDH1_APC_C	REACTOME	0.617188	0.69737	1
REACTOME_REGULATION_OF_ORNITHINE_DECARBOXYLASE_ODC	REACTOME	0.617424	0.698551	1
REACTOME_ACYL_CHAIN_REMODELLING_OF_PG	REACTOME	0.618474	0.699976	1
REACTOME_DEADENYLATION_OF_MRNA	REACTOME	0.631579	0.726588	1
REACTOME_TRANSPORT_OF_VITAMINS_NUCLEOSIDES_AND_RELATED_MOLECULES	REACTOME	0.634051	0.708643	1
REACTOME_SYNTHESIS_OF_PIPS_AT_THE_GOLGI_MEMBRANE	REACTOME	0.640078	0.676924	1
REACTOME_MRNA_PROCESSING	REACTOME	0.646484	0.735749	1
REACTOME_GLYCOLYSIS	REACTOME	0.65272	0.694111	1
REACTOME_IL_3_5_AND_GM_CSF_SIGNALING	REACTOME	0.667327	0.712508	1
REACTOME_NUCLEAR_SIGNALING_BY_ERBB4	REACTOME	0.672727	0.709619	1
REACTOME_ACTIVATED_TAK1_MEDIATES_P38_MAPK_ACTIVATION	REACTOME	0.674286	0.708734	1
REACTOME_CROSS_PRESENTATION_OF_SOLUBLE_EXOGENOUS_ANTIGENS_ENDOSOMES	REACTOME	0.678988	0.828908	1
REACTOME_SIGNALING_BY_HIPPO	REACTOME	0.68242	0.747126	1
REACTOME_METABOLISM_OF_RNA	REACTOME	0.682975	0.802399	1
REACTOME_PROCESSING_OF_CAPPED_INTRON_CONTAINING_PRE_MRNA	REACTOME	0.684314	0.793281	1
REACTOME_VIF_MEDIATED_DEGRADATION_OF_APOBEC3G	REACTOME	0.685328	0.741526	1
REACTOME_ANTIGEN_PROCESSING_CROSS_PRESENTATION	REACTOME	0.687984	0.767978	1
REACTOME_AUTODEGRADATION_OF_THE_E3_UBIQUITIN_LIGASE_COP1	REACTOME	0.688805	0.775965	1
REACTOME_CDK_MEDIATED_PHOSPHORYLATION_AND_REMOVAL_OF_CDC6	REACTOME	0.68932	0.741984	1
REACTOME_TRANSCRIPTIONAL_REGULATION_OF_WHITE_ADIPOCYTE_DIFFERENTIATION	REACTOME	0.692308	0.712605	1
REACTOME_LATE_PHASE_OF_HIV_LIFE_CYCLE	REACTOME	0.69685	0.80989	1
REACTOME_ANTIGEN_PRESENTATION_FOLDING_ASSEMBLY_AND_PEPTIDE_LOADING_OF_CLASS_I_MHC	REACTOME	0.697813	0.801902	1
REACTOME_RAP1_SIGNALLING	REACTOME	0.7	0.713078	1
REACTOME_MRNA_SPLICING	REACTOME	0.70297	0.873425	1
REACTOME_METAL_ION_SLC_TRANSPORTERS	REACTOME	0.703125	0.765433	1
REACTOME_STRIATED_MUSCLE_CONTRACTION	REACTOME	0.714563	0.710017	1
REACTOME_ABORTIVE_ELONGATION_OF_HIV1_TRANSCRIPT_IN_THE_ABSENCE_OF_TAT	REACTOME	0.717349	0.777376	1
REACTOME_GAP_JUNCTION_ASSEMBLY	REACTOME	0.727451	0.735803	1
REACTOME_METABOLISM_OF_MRNA	REACTOME	0.729249	0.829174	1
REACTOME_OXYGEN_DEPENDENT_PROLINE_HYDROXYLATION_OF_HYPOXIA_INDUCIBLE_FACTOR_ALPHA	REACTOME	0.73055	0.775737	1
REACTOME_REGULATION_OF_IFNA_SIGNALING	REACTOME	0.737336	0.769493	1
REACTOME_BOTULINUM_NEUROTOXICITY	REACTOME	0.742248	0.726934	1
REACTOME_METABOLISM_OF_VITAMINS_AND_COFACTORS	REACTOME	0.745527	0.765301	1
REACTOME_TIE2_SIGNALING	REACTOME	0.749499	0.711273	1
REACTOME_RNA_POL_I_TRANSCRIPTION_INITIATION	REACTOME	0.756	0.831783	1
REACTOME_SIGNALING_BY_WNT	REACTOME	0.756705	0.877811	1
REACTOME_G_ALPHA_S_SIGNALLING_EVENTS	REACTOME	0.768443	0.764274	1
REACTOME_CIRCADIAN_REPRESSION_OF_EXPRESSION_BY_REV_ERBA	REACTOME	0.768482	0.83742	1
REACTOME_RNA_POL_III_TRANSCRIPTION_TERMINATION	REACTOME	0.780632	0.832832	1
REACTOME_DOWNSTREAM_SIGNALING_EVENTS_OF_B_CELL_RECEPTOR_BCR	REACTOME	0.785579	0.846516	1
REACTOME_CTNNB1_PHOSPHORYLATION_CASCADE	REACTOME	0.786	0.823565	1
REACTOME_RORA_ACTIVATES_CIRCADIAN_EXPRESSION	REACTOME	0.789168	0.873776	1
REACTOME_AMINO_ACID_AND_OLIGOPEPTIDE_SLC_TRANSPORTERS	REACTOME	0.789963	0.773813	1
REACTOME_POTASSIUM_CHANNELS	REACTOME	0.791919	0.777556	1
REACTOME_DOWNREGULATION_OF_TGF_BETA_RECEPTOR_SIGNALING	REACTOME	0.810916	0.825349	1
REACTOME_DEADENYLATION_DEPENDENT_MRNA_DECAY	REACTOME	0.813492	0.890503	1
REACTOME_SIGNALING_BY_FGFR1_FUSION_MUTANTS	REACTOME	0.850485	0.871647	1
REACTOME_PYRIMIDINE_METABOLISM	REACTOME	0.865702	0.812245	1
REACTOME_SIGNALING_BY_CONSTITUTIVELY_ACTIVE_EGFR	REACTOME	0.870057	0.902375	1
REACTOME_DESTABILIZATION_OF_MRNA_BY_AUF1_HNRNP_D0	REACTOME	0.882353	0.965109	1
REACTOME_AMINE_COMPOUND_SLC_TRANSPORTERS	REACTOME	0.896414	0.813289	1
REACTOME_SIGNALING_BY_FGFR1_MUTANTS	REACTOME	0.904031	0.829056	1
REACTOME_ACETYLCHOLINE_BINDING_AND_DOWNSTREAM_EVENTS	REACTOME	0.909962	0.90889	1
REACTOME_REGULATION_OF_SIGNALING_BY_CBL	REACTOME	0.941406	0.872969	1
REACTOME_FGFR_LIGAND_BINDING_AND_ACTIVATION	REACTOME	0.942553	0.921834	1
REACTOME_TRAF6_MEDIATED_NFKB_ACTIVATION	REACTOME	0.96008	0.922191	1
REACTOME_SHC_MEDIATED_CASCADE	REACTOME	0.971311	0.930564	1
REACTOME_RNA_POL_III_TRANSCRIPTION_INITIATION_FROM_TYPE_2_PROMOTER	REACTOME	0.980237	0.970522	1
REACTOME_SIGNALING_BY_FGFR_MUTANTS	REACTOME	0.980354	0.932334	1
