# Supplementary material for: Generation of human hepatic progenitor cells with regenerative and metabolic capacities from primary hepatocytes
Source: eLife. 2019 Aug 8;8:e47313. doi: 10.7554/eLife.47313 (PMC6731094; doi:10.7554/eLife.47313)
Supplement: Supplementary file 3. [file elife-47313-supp3.xlsx]

## Sheet: Sheet1
Supplementary file 3. All the gene sets enriched in FBS cells at D14 of culture compared with D1 hepatocytes (assessed by GSEA)
NAME	Data base	NOM p-val	FDR q-val	FWER p-val
HALLMARK_MYOGENESIS	HALLMARK	0	0.147304	0.079
HALLMARK_APICAL_SURFACE	HALLMARK	0	0.0985371	0.105
HALLMARK_APICAL_JUNCTION	HALLMARK	0	0.0761507	0.113
HALLMARK_EPITHELIAL_MESENCHYMAL_TRANSITION	HALLMARK	0.00197239	0.0872613	0.157
HALLMARK_GLYCOLYSIS	HALLMARK	0.00203252	0.168948	0.293
HALLMARK_APOPTOSIS	HALLMARK	0.00428265	0.165538	0.45
HALLMARK_ESTROGEN_RESPONSE_EARLY	HALLMARK	0.004329	0.142002	0.376
HALLMARK_WNT_BETA_CATENIN_SIGNALING	HALLMARK	0.00798403	0.231457	0.667
HALLMARK_SPERMATOGENESIS	HALLMARK	0.00856531	0.222145	0.62
HALLMARK_UV_RESPONSE_DN	HALLMARK	0.0204499	0.148616	0.473
HALLMARK_TGF_BETA_SIGNALING	HALLMARK	0.0210526	0.144675	0.34
HALLMARK_NOTCH_SIGNALING	HALLMARK	0.0252632	0.154115	0.455
HALLMARK_MITOTIC_SPINDLE	HALLMARK	0.0259481	0.164127	0.333
HALLMARK_P53_PATHWAY	HALLMARK	0.0316456	0.213103	0.739
HALLMARK_IL2_STAT5_SIGNALING	HALLMARK	0.0382979	0.240384	0.66
HALLMARK_HEME_METABOLISM	HALLMARK	0.049569	0.228802	0.694
HALLMARK_ESTROGEN_RESPONSE_LATE	HALLMARK	0.0811966	0.227569	0.704
HALLMARK_HYPOXIA	HALLMARK	0.10297	0.223106	0.726
HALLMARK_G2M_CHECKPOINT	HALLMARK	0.112648	0.18801	0.562
HALLMARK_REACTIVE_OXIGEN_SPECIES_PATHWAY	HALLMARK	0.135983	0.272029	0.82
HALLMARK_ANGIOGENESIS	HALLMARK	0.140927	0.216813	0.705
HALLMARK_HEDGEHOG_SIGNALING	HALLMARK	0.143162	0.292104	0.819
HALLMARK_PROTEIN_SECRETION	HALLMARK	0.15	0.226996	0.68
HALLMARK_ANDROGEN_RESPONSE	HALLMARK	0.164583	0.281443	0.819
HALLMARK_ALLOGRAFT_REJECTION	HALLMARK	0.209302	0.371162	0.906
HALLMARK_E2F_TARGETS	HALLMARK	0.218254	0.216515	0.731
HALLMARK_KRAS_SIGNALING_UP	HALLMARK	0.252408	0.383234	0.905
HALLMARK_ADIPOGENESIS	HALLMARK	0.255187	0.335223	0.883
HALLMARK_MTORC1_SIGNALING	HALLMARK	0.363257	0.402351	0.92
HALLMARK_PANCREAS_BETA_CELLS	HALLMARK	0.372816	0.474984	0.954
HALLMARK_CHOLESTEROL_HOMEOSTASIS	HALLMARK	0.420082	0.518985	0.968
HALLMARK_INFLAMMATORY_RESPONSE	HALLMARK	0.47318	0.507178	0.969
HALLMARK_DNA_REPAIR	HALLMARK	0.502075	0.511267	0.966
HALLMARK_UNFOLDED_PROTEIN_RESPONSE	HALLMARK	0.517745	0.526765	0.982
HALLMARK_COMPLEMENT	HALLMARK	0.524292	0.521683	0.981
HALLMARK_PEROXISOME	HALLMARK	0.686667	0.679561	0.996
HALLMARK_PI3K_AKT_MTOR_SIGNALING	HALLMARK	0.689379	0.712747	0.996
HALLMARK_KRAS_SIGNALING_DN	HALLMARK	0.697341	0.695016	0.996
HALLMARK_OXIDATIVE_PHOSPHORYLATION	HALLMARK	0.740125	0.897035	1
HALLMARK_MYC_TARGETS_V1	HALLMARK	0.772727	0.904486	1
KEGG_DILATED_CARDIOMYOPATHY	KEGG	0	0.253452	0.119
KEGG_ECM_RECEPTOR_INTERACTION	KEGG	0	0.134304	0.126
KEGG_ARRHYTHMOGENIC_RIGHT_VENTRICULAR_CARDIOMYOPATHY_ARVC	KEGG	0	0.276113	0.297
KEGG_HYPERTROPHIC_CARDIOMYOPATHY_HCM	KEGG	0	0.214364	0.307
KEGG_AXON_GUIDANCE	KEGG	0	0.184231	0.324
KEGG_REGULATION_OF_ACTIN_CYTOSKELETON	KEGG	0	0.205941	0.417
KEGG_FOCAL_ADHESION	KEGG	0	0.187115	0.424
KEGG_P53_SIGNALING_PATHWAY	KEGG	0	0.187917	0.489
KEGG_TIGHT_JUNCTION	KEGG	0	0.181728	0.506
KEGG_VIBRIO_CHOLERAE_INFECTION	KEGG	0	0.173461	0.545
KEGG_GAP_JUNCTION	KEGG	0	0.170168	0.567
KEGG_HEDGEHOG_SIGNALING_PATHWAY	KEGG	0	0.163511	0.573
KEGG_SMALL_CELL_LUNG_CANCER	KEGG	0	0.206556	0.678
KEGG_MELANOGENESIS	KEGG	0	0.195289	0.695
KEGG_MAPK_SIGNALING_PATHWAY	KEGG	0	0.200263	0.731
KEGG_PATHWAYS_IN_CANCER	KEGG	0	0.194326	0.731
KEGG_GLYCOSAMINOGLYCAN_BIOSYNTHESIS_CHONDROITIN_SULFATE	KEGG	0	0.185518	0.753
KEGG_AMYOTROPHIC_LATERAL_SCLEROSIS_ALS	KEGG	0	0.181088	0.757
KEGG_PROGESTERONE_MEDIATED_OOCYTE_MATURATION	KEGG	0	0.170992	0.759
KEGG_COLORECTAL_CANCER	KEGG	0	0.174388	0.774
KEGG_WNT_SIGNALING_PATHWAY	KEGG	0	0.171081	0.786
KEGG_LONG_TERM_POTENTIATION	KEGG	0	0.173908	0.804
KEGG_GNRH_SIGNALING_PATHWAY	KEGG	0	0.182366	0.836
KEGG_CALCIUM_SIGNALING_PATHWAY	KEGG	0.00202429	0.15432	0.575
KEGG_LEUKOCYTE_TRANSENDOTHELIAL_MIGRATION	KEGG	0.00414079	0.163512	0.601
KEGG_ENDOCYTOSIS	KEGG	0.00426439	0.195729	0.752
KEGG_OOCYTE_MEIOSIS	KEGG	0.00623701	0.175661	0.801
KEGG_ADHERENS_JUNCTION	KEGG	0.00813008	0.191807	0.753
KEGG_O_GLYCAN_BIOSYNTHESIS	KEGG	0.0102041	0.187101	0.695
KEGG_MELANOMA	KEGG	0.0104603	0.172854	0.807
KEGG_GLUTATHIONE_METABOLISM	KEGG	0.0104822	0.176273	0.439
KEGG_ALZHEIMERS_DISEASE	KEGG	0.0145228	0.172027	0.518
KEGG_GALACTOSE_METABOLISM	KEGG	0.0167015	0.180246	0.362
KEGG_GLIOMA	KEGG	0.0169851	0.188719	0.871
KEGG_FC_GAMMA_R_MEDIATED_PHAGOCYTOSIS	KEGG	0.0210084	0.189283	0.875
KEGG_PHOSPHATIDYLINOSITOL_SIGNALING_SYSTEM	KEGG	0.0230126	0.175582	0.757
KEGG_CHEMOKINE_SIGNALING_PATHWAY	KEGG	0.0271967	0.21315	0.906
KEGG_GLYCOSAMINOGLYCAN_BIOSYNTHESIS_HEPARAN_SULFATE	KEGG	0.0277778	0.19121	0.881
KEGG_TGF_BETA_SIGNALING_PATHWAY	KEGG	0.0301724	0.191945	0.871
KEGG_VASOPRESSIN_REGULATED_WATER_REABSORPTION	KEGG	0.0334728	0.211282	0.909
KEGG_GLYCOSPHINGOLIPID_BIOSYNTHESIS_LACTO_AND_NEOLACTO_SERIES	KEGG	0.0351967	0.196138	0.715
KEGG_INOSITOL_PHOSPHATE_METABOLISM	KEGG	0.035865	0.191376	0.863
KEGG_BASAL_CELL_CARCINOMA	KEGG	0.0472279	0.194789	0.881
KEGG_GLYCOSPHINGOLIPID_BIOSYNTHESIS_GANGLIO_SERIES	KEGG	0.0481172	0.184874	0.871
KEGG_CARDIAC_MUSCLE_CONTRACTION	KEGG	0.0506073	0.200722	0.689
KEGG_CELL_CYCLE	KEGG	0.0580913	0.196734	0.893
KEGG_GLYCEROLIPID_METABOLISM	KEGG	0.0580913	0.263643	0.955
KEGG_AMINO_SUGAR_AND_NUCLEOTIDE_SUGAR_METABOLISM	KEGG	0.0617284	0.194819	0.878
KEGG_LYSOSOME	KEGG	0.0703934	0.185118	0.831
KEGG_FRUCTOSE_AND_MANNOSE_METABOLISM	KEGG	0.0727273	0.266385	0.959
KEGG_GLYCOSAMINOGLYCAN_DEGRADATION	KEGG	0.075	0.172966	0.781
KEGG_PANCREATIC_CANCER	KEGG	0.0770833	0.216258	0.911
KEGG_VEGF_SIGNALING_PATHWAY	KEGG	0.0778947	0.297741	0.971
KEGG_BLADDER_CANCER	KEGG	0.0798319	0.304618	0.975
KEGG_VASCULAR_SMOOTH_MUSCLE_CONTRACTION	KEGG	0.0819328	0.336665	0.989
KEGG_LONG_TERM_DEPRESSION	KEGG	0.0956341	0.3684	0.993
KEGG_NEUROTROPHIN_SIGNALING_PATHWAY	KEGG	0.106339	0.291121	0.967
KEGG_NOTCH_SIGNALING_PATHWAY	KEGG	0.110879	0.281598	0.963
KEGG_GLYCEROPHOSPHOLIPID_METABOLISM	KEGG	0.129167	0.338663	0.988
KEGG_LEISHMANIA_INFECTION	KEGG	0.131183	0.314682	0.982
KEGG_NATURAL_KILLER_CELL_MEDIATED_CYTOTOXICITY	KEGG	0.133612	0.337286	0.986
KEGG_VIRAL_MYOCARDITIS	KEGG	0.146392	0.300183	0.975
KEGG_PATHOGENIC_ESCHERICHIA_COLI_INFECTION	KEGG	0.149789	0.285736	0.963
KEGG_NOD_LIKE_RECEPTOR_SIGNALING_PATHWAY	KEGG	0.15	0.372395	0.996
KEGG_ERBB_SIGNALING_PATHWAY	KEGG	0.153518	0.330458	0.986
KEGG_FC_EPSILON_RI_SIGNALING_PATHWAY	KEGG	0.173116	0.364785	0.993
KEGG_EPITHELIAL_CELL_SIGNALING_IN_HELICOBACTER_PYLORI_INFECTION	KEGG	0.17623	0.373129	0.993
KEGG_OTHER_GLYCAN_DEGRADATION	KEGG	0.194561	0.313304	0.983
KEGG_DORSO_VENTRAL_AXIS_FORMATION	KEGG	0.196581	0.378846	0.997
KEGG_CHRONIC_MYELOID_LEUKEMIA	KEGG	0.197095	0.293282	0.971
KEGG_CELL_ADHESION_MOLECULES_CAMS	KEGG	0.200828	0.339639	0.989
KEGG_ETHER_LIPID_METABOLISM	KEGG	0.2079	0.37011	0.996
KEGG_MTOR_SIGNALING_PATHWAY	KEGG	0.223849	0.313548	0.983
KEGG_REGULATION_OF_AUTOPHAGY	KEGG	0.229645	0.333183	0.986
KEGG_ENDOMETRIAL_CANCER	KEGG	0.235174	0.336302	0.989
KEGG_T_CELL_RECEPTOR_SIGNALING_PATHWAY	KEGG	0.237323	0.437112	0.997
KEGG_NON_SMALL_CELL_LUNG_CANCER	KEGG	0.240664	0.330257	0.986
KEGG_HUNTINGTONS_DISEASE	KEGG	0.245868	0.351594	0.991
KEGG_ACUTE_MYELOID_LEUKEMIA	KEGG	0.247934	0.362955	0.993
KEGG_PROSTATE_CANCER	KEGG	0.251559	0.337401	0.989
KEGG_RIBOFLAVIN_METABOLISM	KEGG	0.260504	0.406666	0.997
KEGG_APOPTOSIS	KEGG	0.263804	0.338523	0.989
KEGG_GLYCOSYLPHOSPHATIDYLINOSITOL_GPI_ANCHOR_BIOSYNTHESIS	KEGG	0.264646	0.300339	0.977
KEGG_THYROID_CANCER	KEGG	0.278788	0.413961	0.997
KEGG_RENAL_CELL_CARCINOMA	KEGG	0.280335	0.373991	0.996
KEGG_BIOSYNTHESIS_OF_UNSATURATED_FATTY_ACIDS	KEGG	0.309524	0.440345	0.997
KEGG_UBIQUITIN_MEDIATED_PROTEOLYSIS	KEGG	0.310273	0.366641	0.993
KEGG_TOLL_LIKE_RECEPTOR_SIGNALING_PATHWAY	KEGG	0.313929	0.449261	0.997
KEGG_SPHINGOLIPID_METABOLISM	KEGG	0.32636	0.436886	0.997
KEGG_INSULIN_SIGNALING_PATHWAY	KEGG	0.336117	0.36831	0.993
KEGG_PURINE_METABOLISM	KEGG	0.357143	0.432671	0.997
KEGG_RIBOSOME	KEGG	0.359684	0.443144	0.997
KEGG_HOMOLOGOUS_RECOMBINATION	KEGG	0.388446	0.442245	0.997
KEGG_ABC_TRANSPORTERS	KEGG	0.401247	0.517208	1
KEGG_PENTOSE_PHOSPHATE_PATHWAY	KEGG	0.403194	0.49505	0.997
KEGG_N_GLYCAN_BIOSYNTHESIS	KEGG	0.407407	0.44094	0.997
KEGG_JAK_STAT_SIGNALING_PATHWAY	KEGG	0.412017	0.511348	1
KEGG_ALDOSTERONE_REGULATED_SODIUM_REABSORPTION	KEGG	0.413502	0.532848	1
KEGG_NUCLEOTIDE_EXCISION_REPAIR	KEGG	0.41498	0.407306	0.997
KEGG_NICOTINATE_AND_NICOTINAMIDE_METABOLISM	KEGG	0.428571	0.534119	1
KEGG_AMINOACYL_TRNA_BIOSYNTHESIS	KEGG	0.439271	0.44517	0.997
KEGG_CYTOKINE_CYTOKINE_RECEPTOR_INTERACTION	KEGG	0.460888	0.557732	1
KEGG_MISMATCH_REPAIR	KEGG	0.501992	0.474997	0.997
KEGG_SNARE_INTERACTIONS_IN_VESICULAR_TRANSPORT	KEGG	0.512245	0.590805	1
KEGG_DNA_REPLICATION	KEGG	0.512922	0.505229	1
KEGG_TYPE_II_DIABETES_MELLITUS	KEGG	0.515723	0.553358	1
KEGG_PYRUVATE_METABOLISM	KEGG	0.535787	0.617978	1
KEGG_TASTE_TRANSDUCTION	KEGG	0.553606	0.641026	1
KEGG_OXIDATIVE_PHOSPHORYLATION	KEGG	0.583501	0.665193	1
KEGG_BASE_EXCISION_REPAIR	KEGG	0.588353	0.636213	1
KEGG_RIG_I_LIKE_RECEPTOR_SIGNALING_PATHWAY	KEGG	0.606925	0.672572	1
KEGG_STARCH_AND_SUCROSE_METABOLISM	KEGG	0.620758	0.672401	1
KEGG_B_CELL_RECEPTOR_SIGNALING_PATHWAY	KEGG	0.639344	0.66903	1
KEGG_PARKINSONS_DISEASE	KEGG	0.6714	0.732686	1
KEGG_PRIMARY_IMMUNODEFICIENCY	KEGG	0.68714	0.665534	1
KEGG_PYRIMIDINE_METABOLISM	KEGG	0.689516	0.751487	1
KEGG_BASAL_TRANSCRIPTION_FACTORS	KEGG	0.700611	0.806913	1
KEGG_TYPE_I_DIABETES_MELLITUS	KEGG	0.701195	0.755443	1
KEGG_RNA_DEGRADATION	KEGG	0.739919	0.827642	1
KEGG_CITRATE_CYCLE_TCA_CYCLE	KEGG	0.74645	0.807695	1
KEGG_CYTOSOLIC_DNA_SENSING_PATHWAY	KEGG	0.781893	0.749955	1
KEGG_STEROID_BIOSYNTHESIS	KEGG	0.794922	0.825245	1
KEGG_SELENOAMINO_ACID_METABOLISM	KEGG	0.798781	0.803286	1
KEGG_NEUROACTIVE_LIGAND_RECEPTOR_INTERACTION	KEGG	0.839147	0.787934	1
REACTOME_THE_ROLE_OF_NEF_IN_HIV1_REPLICATION_AND_DISEASE_PATHOGENESIS	REACTOME	0	0.480782	0.151
REACTOME_NCAM_SIGNALING_FOR_NEURITE_OUT_GROWTH	REACTOME	0	0.414852	0.226
REACTOME_KERATAN_SULFATE_BIOSYNTHESIS	REACTOME	0	0.334199	0.253
REACTOME_NCAM1_INTERACTIONS	REACTOME	0	0.200376	0.289
REACTOME_NEF_MEDIATES_DOWN_MODULATION_OF_CELL_SURFACE_RECEPTORS_BY_RECRUITING_THEM_TO_CLATHRIN_ADAPTERS	REACTOME	0	0.172312	0.289
REACTOME_NEUROTRANSMITTER_RECEPTOR_BINDING_AND_DOWNSTREAM_TRANSMISSION_IN_THE_POSTSYNAPTIC_CELL	REACTOME	0	0.163742	0.304
REACTOME_AXON_GUIDANCE	REACTOME	0	0.178028	0.337
REACTOME_TRANSMISSION_ACROSS_CHEMICAL_SYNAPSES	REACTOME	0	0.219583	0.425
REACTOME_DEVELOPMENTAL_BIOLOGY	REACTOME	0	0.201789	0.425
REACTOME_O_LINKED_GLYCOSYLATION_OF_MUCINS	REACTOME	0	0.19104	0.428
REACTOME_ACTIVATION_OF_NMDA_RECEPTOR_UPON_GLUTAMATE_BINDING_AND_POSTSYNAPTIC_EVENTS	REACTOME	0	0.206805	0.464
REACTOME_GLYCOSAMINOGLYCAN_METABOLISM	REACTOME	0	0.218251	0.503
REACTOME_INTEGRIN_CELL_SURFACE_INTERACTIONS	REACTOME	0	0.206116	0.504
REACTOME_SEMAPHORIN_INTERACTIONS	REACTOME	0	0.21164	0.525
REACTOME_HS_GAG_DEGRADATION	REACTOME	0	0.186346	0.528
REACTOME_L1CAM_INTERACTIONS	REACTOME	0	0.192827	0.542
REACTOME_POST_NMDA_RECEPTOR_ACTIVATION_EVENTS	REACTOME	0	0.201429	0.564
REACTOME_HEPARAN_SULFATE_HEPARIN_HS_GAG_METABOLISM	REACTOME	0	0.198761	0.574
REACTOME_MUSCLE_CONTRACTION	REACTOME	0	0.212527	0.606
REACTOME_A_TETRASACCHARIDE_LINKER_SEQUENCE_IS_REQUIRED_FOR_GAG_SYNTHESIS	REACTOME	0	0.223003	0.63
REACTOME_CHONDROITIN_SULFATE_DERMATAN_SULFATE_METABOLISM	REACTOME	0	0.241189	0.663
REACTOME_CELL_DEATH_SIGNALLING_VIA_NRAGE_NRIF_AND_NADE	REACTOME	0	0.233817	0.663
REACTOME_ERK_MAPK_TARGETS	REACTOME	0	0.227382	0.666
REACTOME_MHC_CLASS_II_ANTIGEN_PRESENTATION	REACTOME	0	0.228014	0.709
REACTOME_MYOGENESIS	REACTOME	0	0.228097	0.714
REACTOME_NRAGE_SIGNALS_DEATH_THROUGH_JNK	REACTOME	0	0.24919	0.741
REACTOME_CREB_PHOSPHORYLATION_THROUGH_THE_ACTIVATION_OF_RAS	REACTOME	0	0.243684	0.752
REACTOME_CHONDROITIN_SULFATE_BIOSYNTHESIS	REACTOME	0	0.245207	0.754
REACTOME_NUCLEAR_EVENTS_KINASE_AND_TRANSCRIPTION_FACTOR_ACTIVATION	REACTOME	0	0.249896	0.767
REACTOME_G_ALPHA_Z_SIGNALLING_EVENTS	REACTOME	0	0.247044	0.767
REACTOME_G1_PHASE	REACTOME	0	0.241796	0.767
REACTOME_SIGNALING_BY_RHO_GTPASES	REACTOME	0	0.237199	0.768
REACTOME_FACTORS_INVOLVED_IN_MEGAKARYOCYTE_DEVELOPMENT_AND_PLATELET_PRODUCTION	REACTOME	0	0.261119	0.801
REACTOME_LYSOSOME_VESICLE_BIOGENESIS	REACTOME	0	0.27612	0.834
REACTOME_SIGNALLING_BY_NGF	REACTOME	0	0.287251	0.852
REACTOME_SIGNAL_TRANSDUCTION_BY_L1	REACTOME	0	0.275578	0.878
REACTOME_SMOOTH_MUSCLE_CONTRACTION	REACTOME	0	0.300018	0.889
REACTOME_P75_NTR_RECEPTOR_MEDIATED_SIGNALLING	REACTOME	0	0.298953	0.889
REACTOME_PLC_BETA_MEDIATED_EVENTS	REACTOME	0	0.302198	0.897
REACTOME_NGF_SIGNALLING_VIA_TRKA_FROM_THE_PLASMA_MEMBRANE	REACTOME	0	0.294335	0.9
REACTOME_KINESINS	REACTOME	0	0.292399	0.9
REACTOME_REGULATION_OF_INSULIN_SECRETION	REACTOME	0.00191571	0.28573	0.883
REACTOME_EFFECTS_OF_PIP2_HYDROLYSIS	REACTOME	0.0019305	0.230178	0.706
REACTOME_POST_CHAPERONIN_TUBULIN_FOLDING_PATHWAY	REACTOME	0.00200401	0.275262	0.816
REACTOME_OPIOID_SIGNALLING	REACTOME	0.00373134	0.284388	0.94
REACTOME_SIGNALING_BY_FGFR	REACTOME	0.00380952	0.286971	0.874
REACTOME_DOWNSTREAM_SIGNALING_OF_ACTIVATED_FGFR	REACTOME	0.00380952	0.287843	0.936
REACTOME_KERATAN_SULFATE_KERATIN_METABOLISM	REACTOME	0.00387597	0.21887	0.403
REACTOME_TRAFFICKING_OF_AMPA_RECEPTORS	REACTOME	0.00389105	0.204708	0.527
REACTOME_GAP_JUNCTION_TRAFFICKING	REACTOME	0.00389105	0.244358	0.742
REACTOME_NEURONAL_SYSTEM	REACTOME	0.00396825	0.228223	0.641
REACTOME_CELL_SURFACE_INTERACTIONS_AT_THE_VASCULAR_WALL	REACTOME	0.00557621	0.283701	0.854
REACTOME_G_ALPHA1213_SIGNALLING_EVENTS	REACTOME	0.00572519	0.280395	0.878
REACTOME_SIGNALING_BY_PDGF	REACTOME	0.00575816	0.280494	0.867
REACTOME_COLLAGEN_FORMATION	REACTOME	0.00795229	0.235962	0.284
REACTOME_TRAFFICKING_OF_GLUR2_CONTAINING_AMPA_RECEPTORS	REACTOME	0.00808081	0.296269	0.888
REACTOME_CA_DEPENDENT_EVENTS	REACTOME	0.00970874	0.284816	0.931
REACTOME_SIGNALING_BY_FGFR_IN_DISEASE	REACTOME	0.00978474	0.284649	0.936
REACTOME_EXTRACELLULAR_MATRIX_ORGANIZATION	REACTOME	0.00984252	0.263205	0.264
REACTOME_HS_GAG_BIOSYNTHESIS	REACTOME	0.011236	0.229621	0.694
REACTOME_INTEGRATION_OF_ENERGY_METABOLISM	REACTOME	0.0114723	0.319683	0.967
REACTOME_DOWNREGULATION_OF_TGF_BETA_RECEPTOR_SIGNALING	REACTOME	0.0116959	0.290233	0.94
REACTOME_RAS_ACTIVATION_UOPN_CA2_INFUX_THROUGH_NMDA_RECEPTOR	REACTOME	0.0118343	0.236638	0.706
REACTOME_REGULATION_OF_KIT_SIGNALING	REACTOME	0.012	0.338157	0.976
REACTOME_TRANSPORT_OF_INORGANIC_CATIONS_ANIONS_AND_AMINO_ACIDS_OLIGOPEPTIDES	REACTOME	0.0121212	0.304096	0.917
REACTOME_INTERACTION_BETWEEN_L1_AND_ANKYRINS	REACTOME	0.0121457	0.19521	0.527
REACTOME_SIGNALLING_TO_RAS	REACTOME	0.0133588	0.290067	0.935
REACTOME_HEMOSTASIS	REACTOME	0.0169173	0.300341	0.946
REACTOME_SIGNALING_BY_EGFR_IN_CANCER	REACTOME	0.0171429	0.30144	0.897
REACTOME_CELL_CELL_COMMUNICATION	REACTOME	0.017341	0.301989	0.9
REACTOME_MAPK_TARGETS_NUCLEAR_EVENTS_MEDIATED_BY_MAP_KINASES	REACTOME	0.0191571	0.316176	0.957
REACTOME_RECYCLING_PATHWAY_OF_L1	REACTOME	0.0194932	0.289426	0.944
REACTOME_METABOLISM_OF_CARBOHYDRATES	REACTOME	0.0196078	0.290836	0.94
REACTOME_INSULIN_SYNTHESIS_AND_PROCESSING	REACTOME	0.0211538	0.313316	0.957
REACTOME_INTEGRIN_ALPHAIIB_BETA3_SIGNALING	REACTOME	0.0216963	0.295536	0.922
REACTOME_BASIGIN_INTERACTIONS	REACTOME	0.0226843	0.250892	0.76
REACTOME_DIABETES_PATHWAYS	REACTOME	0.0251938	0.318207	0.961
REACTOME_DEPOSITION_OF_NEW_CENPA_CONTAINING_NUCLEOSOMES_AT_THE_CENTROMERE	REACTOME	0.0257426	0.304755	0.897
REACTOME_P130CAS_LINKAGE_TO_MAPK_SIGNALING_FOR_INTEGRINS	REACTOME	0.0260521	0.294317	0.889
REACTOME_GLUCAGON_SIGNALING_IN_METABOLIC_REGULATION	REACTOME	0.0270793	0.325259	0.968
REACTOME_PRE_NOTCH_EXPRESSION_AND_PROCESSING	REACTOME	0.0273973	0.308177	0.948
REACTOME_GRB2_SOS_PROVIDES_LINKAGE_TO_MAPK_SIGNALING_FOR_INTERGRINS_	REACTOME	0.027668	0.299039	0.92
REACTOME_ACYL_CHAIN_REMODELLING_OF_PC	REACTOME	0.0286807	0.288726	0.929
REACTOME_PHOSPHOLIPASE_C_MEDIATED_CASCADE	REACTOME	0.0290698	0.323998	0.968
REACTOME_CREB_PHOSPHORYLATION_THROUGH_THE_ACTIVATION_OF_CAMKII	REACTOME	0.0307102	0.247289	0.746
REACTOME_CELL_JUNCTION_ORGANIZATION	REACTOME	0.0308285	0.295781	0.907
REACTOME_SEMA4D_IN_SEMAPHORIN_SIGNALING	REACTOME	0.0322581	0.280696	0.856
REACTOME_PLATELET_ACTIVATION_SIGNALING_AND_AGGREGATION	REACTOME	0.0327553	0.335945	0.979
REACTOME_TGF_BETA_RECEPTOR_SIGNALING_ACTIVATES_SMADS	REACTOME	0.0332681	0.312487	0.948
REACTOME_PLATELET_AGGREGATION_PLUG_FORMATION	REACTOME	0.0337302	0.323131	0.965
REACTOME_CYCLIN_A_B1_ASSOCIATED_EVENTS_DURING_G2_M_TRANSITION	REACTOME	0.034749	0.302947	0.92
REACTOME_PKA_MEDIATED_PHOSPHORYLATION_OF_CREB	REACTOME	0.034749	0.322357	0.965
REACTOME_SIGNALING_BY_ERBB2	REACTOME	0.0348162	0.287172	0.94
REACTOME_ADHERENS_JUNCTIONS_INTERACTIONS	REACTOME	0.0348837	0.278083	0.858
REACTOME_OTHER_SEMAPHORIN_INTERACTIONS	REACTOME	0.0374016	0.25584	0.741
REACTOME_THROMBIN_SIGNALLING_THROUGH_PROTEINASE_ACTIVATED_RECEPTORS_PARS	REACTOME	0.0397727	0.306763	0.95
REACTOME_CTLA4_INHIBITORY_SIGNALING	REACTOME	0.0405405	0.29363	0.929
REACTOME_MITOTIC_PROMETAPHASE	REACTOME	0.0447471	0.309412	0.948
REACTOME_PYRUVATE_METABOLISM	REACTOME	0.0518234	0.294944	0.926
REACTOME_REGULATION_OF_INSULIN_SECRETION_BY_GLUCAGON_LIKE_PEPTIDE1	REACTOME	0.0521235	0.371545	0.992
REACTOME_FORMATION_OF_TUBULIN_FOLDING_INTERMEDIATES_BY_CCT_TRIC	REACTOME	0.0527344	0.297531	0.897
REACTOME_RAP1_SIGNALLING	REACTOME	0.0597302	0.287377	0.931
REACTOME_UNBLOCKING_OF_NMDA_RECEPTOR_GLUTAMATE_BINDING_AND_ACTIVATION	REACTOME	0.059761	0.298026	0.9
REACTOME_SEMA4D_INDUCED_CELL_MIGRATION_AND_GROWTH_CONE_COLLAPSE	REACTOME	0.061657	0.293403	0.935
REACTOME_GPVI_MEDIATED_ACTIVATION_CASCADE	REACTOME	0.0640301	0.290361	0.929
REACTOME_SIGNALING_BY_SCF_KIT	REACTOME	0.0649606	0.323721	0.968
REACTOME_GABA_B_RECEPTOR_ACTIVATION	REACTOME	0.0656371	0.284998	0.878
REACTOME_COSTIMULATION_BY_THE_CD28_FAMILY	REACTOME	0.0661323	0.410524	0.996
REACTOME_PI_3K_CASCADE	REACTOME	0.068	0.412702	0.997
REACTOME_G_PROTEIN_BETA_GAMMA_SIGNALLING	REACTOME	0.0745098	0.346896	0.984
REACTOME_GABA_RECEPTOR_ACTIVATION	REACTOME	0.075	0.278824	0.829
REACTOME_PREFOLDIN_MEDIATED_TRANSFER_OF_SUBSTRATE_TO_CCT_TRIC	REACTOME	0.0756972	0.288687	0.944
REACTOME_ACTIVATION_OF_CHAPERONE_GENES_BY_XBP1S	REACTOME	0.0761719	0.293462	0.946
REACTOME_GABA_SYNTHESIS_RELEASE_REUPTAKE_AND_DEGRADATION	REACTOME	0.0763052	0.300055	0.917
REACTOME_MEIOTIC_RECOMBINATION	REACTOME	0.0785855	0.291743	0.907
REACTOME_DAG_AND_IP3_SIGNALING	REACTOME	0.0800781	0.342224	0.979
REACTOME_MITOTIC_G2_G2_M_PHASES	REACTOME	0.0803922	0.322313	0.964
REACTOME_GRB2_EVENTS_IN_ERBB2_SIGNALING	REACTOME	0.0823529	0.350703	0.988
REACTOME_PRE_NOTCH_PROCESSING_IN_GOLGI	REACTOME	0.0826772	0.322779	0.964
REACTOME_SIGNAL_AMPLIFICATION	REACTOME	0.0830116	0.308547	0.95
REACTOME_EGFR_DOWNREGULATION	REACTOME	0.0839844	0.350733	0.988
REACTOME_REGULATION_OF_WATER_BALANCE_BY_RENAL_AQUAPORINS	REACTOME	0.0851064	0.380205	0.994
REACTOME_NUCLEOTIDE_BINDING_DOMAIN_LEUCINE_RICH_REPEAT_CONTAINING_RECEPTOR_NLR_SIGNALING_PATHWAYS	REACTOME	0.0877193	0.416556	0.997
REACTOME_CELL_CELL_JUNCTION_ORGANIZATION	REACTOME	0.0935673	0.345702	0.984
REACTOME_INHIBITION_OF_INSULIN_SECRETION_BY_ADRENALINE_NORADRENALINE	REACTOME	0.09375	0.322809	0.964
REACTOME_MEIOSIS	REACTOME	0.0967118	0.308302	0.948
REACTOME_PIP3_ACTIVATES_AKT_SIGNALING	REACTOME	0.0972222	0.339111	0.979
REACTOME_SHC1_EVENTS_IN_ERBB4_SIGNALING	REACTOME	0.10101	0.399072	0.996
REACTOME_G1_S_SPECIFIC_TRANSCRIPTION	REACTOME	0.101961	0.391027	0.995
REACTOME_POST_TRANSLATIONAL_PROTEIN_MODIFICATION	REACTOME	0.103516	0.341124	0.979
REACTOME_LOSS_OF_NLP_FROM_MITOTIC_CENTROSOMES	REACTOME	0.104126	0.321029	0.965
REACTOME_SHC_RELATED_EVENTS	REACTOME	0.104962	0.323503	0.969
REACTOME_CHROMOSOME_MAINTENANCE	REACTOME	0.107422	0.340168	0.975
REACTOME_SIGNALING_BY_ROBO_RECEPTOR	REACTOME	0.107632	0.336856	0.976
REACTOME_CELL_CYCLE	REACTOME	0.110454	0.326306	0.965
REACTOME_GLUTATHIONE_CONJUGATION	REACTOME	0.113725	0.339984	0.979
REACTOME_STRIATED_MUSCLE_CONTRACTION	REACTOME	0.115079	0.287904	0.944
REACTOME_NEPHRIN_INTERACTIONS	REACTOME	0.115234	0.347934	0.988
REACTOME_YAP1_AND_WWTR1_TAZ_STIMULATED_GENE_EXPRESSION	REACTOME	0.116142	0.349867	0.988
REACTOME_ACTIVATION_OF_KAINATE_RECEPTORS_UPON_GLUTAMATE_BINDING	REACTOME	0.116601	0.37342	0.993
REACTOME_SIGNALING_BY_BMP	REACTOME	0.118812	0.324262	0.965
REACTOME_SIGNALLING_TO_ERKS	REACTOME	0.121514	0.397298	0.996
REACTOME_PI3K_EVENTS_IN_ERBB4_SIGNALING	REACTOME	0.122841	0.403116	0.996
REACTOME_ADP_SIGNALLING_THROUGH_P2RY1	REACTOME	0.12476	0.347184	0.982
REACTOME_SIGNALING_BY_NOTCH	REACTOME	0.129094	0.370236	0.993
REACTOME_TRANSMEMBRANE_TRANSPORT_OF_SMALL_MOLECULES	REACTOME	0.129225	0.419525	0.997
REACTOME_SYNTHESIS_AND_INTERCONVERSION_OF_NUCLEOTIDE_DI_AND_TRIPHOSPHATES	REACTOME	0.129845	0.321796	0.965
REACTOME_INSULIN_RECEPTOR_RECYCLING	REACTOME	0.132576	0.37272	0.993
REACTOME_RECRUITMENT_OF_MITOTIC_CENTROSOME_PROTEINS_AND_COMPLEXES	REACTOME	0.133333	0.318592	0.965
REACTOME_CGMP_EFFECTS	REACTOME	0.133962	0.347817	0.988
REACTOME_MYD88_MAL_CASCADE_INITIATED_ON_PLASMA_MEMBRANE	REACTOME	0.134387	0.407622	0.996
REACTOME_SHC_MEDIATED_SIGNALLING	REACTOME	0.134981	0.324658	0.965
REACTOME_E2F_MEDIATED_REGULATION_OF_DNA_REPLICATION	REACTOME	0.13745	0.371358	0.993
REACTOME_ION_TRANSPORT_BY_P_TYPE_ATPASES	REACTOME	0.139216	0.412569	0.996
REACTOME_DOWNSTREAM_SIGNAL_TRANSDUCTION	REACTOME	0.143418	0.323365	0.969
REACTOME_AQUAPORIN_MEDIATED_TRANSPORT	REACTOME	0.14425	0.449506	1
REACTOME_SIGNALING_BY_ERBB4	REACTOME	0.144869	0.386102	0.995
REACTOME_MAP_KINASE_ACTIVATION_IN_TLR_CASCADE	REACTOME	0.146535	0.377858	0.994
REACTOME_G_BETA_GAMMA_SIGNALLING_THROUGH_PI3KGAMMA	REACTOME	0.148297	0.388598	0.995
REACTOME_CELL_CYCLE_MITOTIC	REACTOME	0.150495	0.336313	0.975
REACTOME_PHOSPHORYLATION_OF_THE_APC_C	REACTOME	0.151575	0.406648	0.996
REACTOME_PI3K_EVENTS_IN_ERBB2_SIGNALING	REACTOME	0.152174	0.410883	0.997
REACTOME_LATENT_INFECTION_OF_HOMO_SAPIENS_WITH_MYCOBACTERIUM_TUBERCULOSIS	REACTOME	0.156	0.368034	0.99
REACTOME_NETRIN1_SIGNALING	REACTOME	0.156788	0.408723	0.997
REACTOME_GAB1_SIGNALOSOME	REACTOME	0.159046	0.349729	0.988
REACTOME_MITOTIC_M_M_G1_PHASES	REACTOME	0.16129	0.348259	0.988
REACTOME_TELOMERE_MAINTENANCE	REACTOME	0.162476	0.389358	0.995
REACTOME_MEMBRANE_TRAFFICKING	REACTOME	0.163708	0.38127	0.994
REACTOME_DARPP_32_EVENTS	REACTOME	0.164356	0.367034	0.993
REACTOME_GASTRIN_CREB_SIGNALLING_PATHWAY_VIA_PKC_AND_MAPK	REACTOME	0.165385	0.418711	0.997
REACTOME_TRAF6_MEDIATED_INDUCTION_OF_NFKB_AND_MAP_KINASES_UPON_TLR7_8_OR_9_ACTIVATION	REACTOME	0.168	0.451686	1
REACTOME_SRP_DEPENDENT_COTRANSLATIONAL_PROTEIN_TARGETING_TO_MEMBRANE	REACTOME	0.169043	0.382271	0.994
REACTOME_ACTIVATED_TLR4_SIGNALLING	REACTOME	0.170254	0.433403	0.997
REACTOME_SIGNALING_BY_TGF_BETA_RECEPTOR_COMPLEX	REACTOME	0.170341	0.387965	0.995
REACTOME_PYRUVATE_METABOLISM_AND_CITRIC_ACID_TCA_CYCLE	REACTOME	0.172619	0.346891	0.988
REACTOME_ASPARAGINE_N_LINKED_GLYCOSYLATION	REACTOME	0.176238	0.384176	0.994
REACTOME_APC_CDC20_MEDIATED_DEGRADATION_OF_NEK2A	REACTOME	0.180915	0.40624	0.996
REACTOME_PLATELET_HOMEOSTASIS	REACTOME	0.182	0.421067	0.997
REACTOME_APC_C_CDC20_MEDIATED_DEGRADATION_OF_CYCLIN_B	REACTOME	0.183267	0.408641	0.996
REACTOME_NFKB_AND_MAP_KINASES_ACTIVATION_MEDIATED_BY_TLR4_SIGNALING_REPERTOIRE	REACTOME	0.183432	0.438185	1
REACTOME_UNFOLDED_PROTEIN_RESPONSE	REACTOME	0.195652	0.406548	0.996
REACTOME_TOLL_RECEPTOR_CASCADES	REACTOME	0.196498	0.436012	0.997
REACTOME_SHC1_EVENTS_IN_EGFR_SIGNALING	REACTOME	0.197266	0.361483	0.988
REACTOME_RNA_POL_I_PROMOTER_OPENING	REACTOME	0.198444	0.291536	0.944
REACTOME_IL_2_SIGNALING	REACTOME	0.2	0.411451	0.997
REACTOME_FRS2_MEDIATED_CASCADE	REACTOME	0.204868	0.488775	1
REACTOME_DEGRADATION_OF_THE_EXTRACELLULAR_MATRIX	REACTOME	0.209073	0.453407	1
REACTOME_DNA_REPLICATION	REACTOME	0.211268	0.368497	0.993
REACTOME_PROTEIN_FOLDING	REACTOME	0.213147	0.410547	0.996
REACTOME_INFLAMMASOMES	REACTOME	0.214421	0.485098	1
REACTOME_PI3K_AKT_ACTIVATION	REACTOME	0.221344	0.430723	0.997
REACTOME_ION_CHANNEL_TRANSPORT	REACTOME	0.225549	0.431347	0.997
REACTOME_HOMOLOGOUS_RECOMBINATION_REPAIR_OF_REPLICATION_INDEPENDENT_DOUBLE_STRAND_BREAKS	REACTOME	0.226378	0.39272	0.995
REACTOME_NITRIC_OXIDE_STIMULATES_GUANYLATE_CYCLASE	REACTOME	0.227273	0.429467	0.997
REACTOME_INHIBITION_OF_THE_PROTEOLYTIC_ACTIVITY_OF_APC_C_REQUIRED_FOR_THE_ONSET_OF_ANAPHASE_BY_MITOTIC_SPINDLE_CHECKPOINT_COMPONENTS	REACTOME	0.228	0.421639	0.997
REACTOME_SYNTHESIS_OF_PIPS_AT_THE_PLASMA_MEMBRANE	REACTOME	0.231076	0.42788	0.997
REACTOME_SIGNALING_BY_INSULIN_RECEPTOR	REACTOME	0.23494	0.448779	1
REACTOME_RNA_POL_I_TRANSCRIPTION	REACTOME	0.235867	0.4088	0.997
REACTOME_G_PROTEIN_ACTIVATION	REACTOME	0.239464	0.457372	1
REACTOME_ADP_SIGNALLING_THROUGH_P2RY12	REACTOME	0.239521	0.44832	1
REACTOME_DOUBLE_STRAND_BREAK_REPAIR	REACTOME	0.241245	0.37318	0.992
REACTOME_ACTIVATED_NOTCH1_TRANSMITS_SIGNAL_TO_THE_NUCLEUS	REACTOME	0.243083	0.432877	0.997
REACTOME_SLC_MEDIATED_TRANSMEMBRANE_TRANSPORT	REACTOME	0.246493	0.485617	1
REACTOME_APOPTOTIC_EXECUTION_PHASE	REACTOME	0.250482	0.430053	0.997
REACTOME_TRANSCRIPTIONAL_REGULATION_OF_WHITE_ADIPOCYTE_DIFFERENTIATION	REACTOME	0.251485	0.457201	1
REACTOME_CD28_CO_STIMULATION	REACTOME	0.251968	0.450387	1
REACTOME_MITOTIC_G1_G1_S_PHASES	REACTOME	0.252016	0.387446	0.995
REACTOME_GAP_JUNCTION_ASSEMBLY	REACTOME	0.252446	0.448496	1
REACTOME_TERMINATION_OF_O_GLYCAN_BIOSYNTHESIS	REACTOME	0.253906	0.449917	1
REACTOME_REGULATION_OF_MITOTIC_CELL_CYCLE	REACTOME	0.25498	0.431024	0.997
REACTOME_NEUROTRANSMITTER_RELEASE_CYCLE	REACTOME	0.256566	0.447039	1
REACTOME_INHIBITION_OF_VOLTAGE_GATED_CA2_CHANNELS_VIA_GBETA_GAMMA_SUBUNITS	REACTOME	0.256757	0.410031	0.997
REACTOME_NEGATIVE_REGULATION_OF_FGFR_SIGNALING	REACTOME	0.257322	0.487521	1
REACTOME_PHASE_II_CONJUGATION	REACTOME	0.262042	0.532117	1
REACTOME_PRE_NOTCH_TRANSCRIPTION_AND_TRANSLATION	REACTOME	0.264188	0.447117	1
REACTOME_G_BETA_GAMMA_SIGNALLING_THROUGH_PLC_BETA	REACTOME	0.27451	0.469597	1
REACTOME_TRIF_MEDIATED_TLR3_SIGNALING	REACTOME	0.27668	0.487289	1
REACTOME_GLYCEROPHOSPHOLIPID_BIOSYNTHESIS	REACTOME	0.28	0.499405	1
REACTOME_CONVERSION_FROM_APC_C_CDC20_TO_APC_C_CDH1_IN_LATE_ANAPHASE	REACTOME	0.280318	0.450018	1
REACTOME_MEIOTIC_SYNAPSIS	REACTOME	0.281008	0.43151	0.997
REACTOME_NUCLEOTIDE_LIKE_PURINERGIC_RECEPTORS	REACTOME	0.285985	0.449476	1
REACTOME_TRANSPORT_TO_THE_GOLGI_AND_SUBSEQUENT_MODIFICATION	REACTOME	0.288538	0.457636	1
REACTOME_FORMATION_OF_INCISION_COMPLEX_IN_GG_NER	REACTOME	0.288845	0.422871	0.997
REACTOME_TRANS_GOLGI_NETWORK_VESICLE_BUDDING	REACTOME	0.291581	0.412999	0.997
REACTOME_SIGNALING_BY_FGFR1_MUTANTS	REACTOME	0.292585	0.479093	1
REACTOME_PACKAGING_OF_TELOMERE_ENDS	REACTOME	0.293774	0.400826	0.996
REACTOME_GLYCOGEN_BREAKDOWN_GLYCOGENOLYSIS	REACTOME	0.293996	0.44821	1
REACTOME_G0_AND_EARLY_G1	REACTOME	0.294235	0.445197	1
REACTOME_THROMBOXANE_SIGNALLING_THROUGH_TP_RECEPTOR	REACTOME	0.301887	0.528236	1
REACTOME_G_ALPHA_Q_SIGNALLING_EVENTS	REACTOME	0.302974	0.530197	1
REACTOME_IL_RECEPTOR_SHC_SIGNALING	REACTOME	0.304175	0.486443	1
REACTOME_AMYLOIDS	REACTOME	0.306043	0.417485	0.997
REACTOME_GLUTAMATE_NEUROTRANSMITTER_RELEASE_CYCLE	REACTOME	0.306796	0.458903	1
REACTOME_INSULIN_RECEPTOR_SIGNALLING_CASCADE	REACTOME	0.308765	0.499056	1
REACTOME_METABOLISM_OF_PROTEINS	REACTOME	0.309237	0.459059	1
REACTOME_GOLGI_ASSOCIATED_VESICLE_BIOGENESIS	REACTOME	0.313008	0.433222	0.997
REACTOME_POTASSIUM_CHANNELS	REACTOME	0.315175	0.486625	1
REACTOME_N_GLYCAN_ANTENNAE_ELONGATION_IN_THE_MEDIAL_TRANS_GOLGI	REACTOME	0.315476	0.487511	1
REACTOME_PEPTIDE_CHAIN_ELONGATION	REACTOME	0.316562	0.528067	1
REACTOME_APOPTOTIC_CLEAVAGE_OF_CELLULAR_PROTEINS	REACTOME	0.317308	0.463899	1
REACTOME_G_ALPHA_I_SIGNALLING_EVENTS	REACTOME	0.318008	0.558529	1
REACTOME_GLYCOSPHINGOLIPID_METABOLISM	REACTOME	0.319608	0.46835	1
REACTOME_G1_S_TRANSITION	REACTOME	0.329317	0.443399	1
REACTOME_DOWNREGULATION_OF_SMAD2_3_SMAD4_TRANSCRIPTIONAL_ACTIVITY	REACTOME	0.330661	0.533565	1
REACTOME_TCA_CYCLE_AND_RESPIRATORY_ELECTRON_TRANSPORT	REACTOME	0.331325	0.447527	1
REACTOME_PROSTACYCLIN_SIGNALLING_THROUGH_PROSTACYCLIN_RECEPTOR	REACTOME	0.335849	0.540315	1
REACTOME_SPHINGOLIPID_METABOLISM	REACTOME	0.336595	0.498683	1
REACTOME_NOD1_2_SIGNALING_PATHWAY	REACTOME	0.337374	0.527606	1
REACTOME_SIGNALLING_TO_P38_VIA_RIT_AND_RIN	REACTOME	0.337972	0.549199	1
REACTOME_POST_TRANSLATIONAL_MODIFICATION_SYNTHESIS_OF_GPI_ANCHORED_PROTEINS	REACTOME	0.338583	0.42858	0.997
REACTOME_PROTEOLYTIC_CLEAVAGE_OF_SNARE_COMPLEX_PROTEINS	REACTOME	0.338742	0.528545	1
REACTOME_APOPTOSIS	REACTOME	0.341699	0.44901	1
REACTOME_ACETYLCHOLINE_BINDING_AND_DOWNSTREAM_EVENTS	REACTOME	0.34413	0.524687	1
REACTOME_PHOSPHOLIPID_METABOLISM	REACTOME	0.349301	0.449134	1
REACTOME_AMINO_ACID_TRANSPORT_ACROSS_THE_PLASMA_MEMBRANE	REACTOME	0.365385	0.532105	1
REACTOME_RNA_POL_I_RNA_POL_III_AND_MITOCHONDRIAL_TRANSCRIPTION	REACTOME	0.367308	0.524516	1
REACTOME_ACTIVATION_OF_BH3_ONLY_PROTEINS	REACTOME	0.368932	0.527259	1
REACTOME_ENOS_ACTIVATION_AND_REGULATION	REACTOME	0.37	0.486546	1
REACTOME_ABC_FAMILY_PROTEINS_MEDIATED_TRANSPORT	REACTOME	0.372137	0.55467	1
REACTOME_RESPONSE_TO_ELEVATED_PLATELET_CYTOSOLIC_CA2_	REACTOME	0.374525	0.530158	1
REACTOME_ANTIGEN_ACTIVATES_B_CELL_RECEPTOR_LEADING_TO_GENERATION_OF_SECOND_MESSENGERS	REACTOME	0.374761	0.54922	1
REACTOME_ACTIVATION_OF_THE_PRE_REPLICATIVE_COMPLEX	REACTOME	0.384462	0.485771	1
REACTOME_SIGNALING_BY_HIPPO	REACTOME	0.384615	0.526856	1
REACTOME_GLOBAL_GENOMIC_NER_GG_NER	REACTOME	0.385081	0.45841	1
REACTOME_INTRINSIC_PATHWAY_FOR_APOPTOSIS	REACTOME	0.389662	0.530929	1
REACTOME_PLATELET_SENSITIZATION_BY_LDL	REACTOME	0.390291	0.546231	1
REACTOME_CITRIC_ACID_CYCLE_TCA_CYCLE	REACTOME	0.405941	0.51496	1
REACTOME_SYNTHESIS_OF_GLYCOSYLPHOSPHATIDYLINOSITOL_GPI	REACTOME	0.406883	0.531372	1
REACTOME_G2_M_CHECKPOINTS	REACTOME	0.428287	0.525162	1
REACTOME_FANCONI_ANEMIA_PATHWAY	REACTOME	0.430255	0.529813	1
REACTOME_ACYL_CHAIN_REMODELLING_OF_PE	REACTOME	0.43222	0.612096	1
REACTOME_SIGNALING_BY_ILS	REACTOME	0.432323	0.587837	1
REACTOME_ABCA_TRANSPORTERS_IN_LIPID_HOMEOSTASIS	REACTOME	0.433071	0.586574	1
REACTOME_PI_METABOLISM	REACTOME	0.433735	0.499135	1
REACTOME_BRANCHED_CHAIN_AMINO_ACID_CATABOLISM	REACTOME	0.434608	0.574292	1
REACTOME_INWARDLY_RECTIFYING_K_CHANNELS	REACTOME	0.434698	0.608615	1
REACTOME_REGULATION_OF_INSULIN_LIKE_GROWTH_FACTOR_IGF_ACTIVITY_BY_INSULIN_LIKE_GROWTH_FACTOR_BINDING_PROTEINS_IGFBPS	REACTOME	0.436893	0.598492	1
REACTOME_DNA_STRAND_ELONGATION	REACTOME	0.437126	0.525731	1
REACTOME_CELL_CYCLE_CHECKPOINTS	REACTOME	0.442886	0.528171	1
REACTOME_ARMS_MEDIATED_ACTIVATION	REACTOME	0.443548	0.565592	1
REACTOME_SIGNALING_BY_NOTCH1	REACTOME	0.445098	0.56752	1
REACTOME_BOTULINUM_NEUROTOXICITY	REACTOME	0.445312	0.609197	1
REACTOME_CLASS_I_MHC_MEDIATED_ANTIGEN_PROCESSING_PRESENTATION	REACTOME	0.447154	0.579851	1
REACTOME_CTNNB1_PHOSPHORYLATION_CASCADE	REACTOME	0.449304	0.606152	1
REACTOME_CD28_DEPENDENT_PI3K_AKT_SIGNALING	REACTOME	0.452427	0.602029	1
REACTOME_DNA_REPAIR	REACTOME	0.453252	0.530241	1
REACTOME_INFLUENZA_VIRAL_RNA_TRANSCRIPTION_AND_REPLICATION	REACTOME	0.454167	0.573661	1
REACTOME_ASSOCIATION_OF_TRIC_CCT_WITH_TARGET_PROTEINS_DURING_BIOSYNTHESIS	REACTOME	0.454902	0.611673	1
REACTOME_BIOSYNTHESIS_OF_THE_N_GLYCAN_PRECURSOR_DOLICHOL_LIPID_LINKED_OLIGOSACCHARIDE_LLO_AND_TRANSFER_TO_A_NASCENT_PROTEIN	REACTOME	0.455446	0.580571	1
REACTOME_TIE2_SIGNALING	REACTOME	0.457831	0.61955	1
REACTOME_PI3K_CASCADE	REACTOME	0.479125	0.614141	1
REACTOME_TRANSCRIPTIONAL_ACTIVITY_OF_SMAD2_SMAD3_SMAD4_HETEROTRIMER	REACTOME	0.481781	0.590005	1
REACTOME_NUCLEOTIDE_EXCISION_REPAIR	REACTOME	0.483034	0.531041	1
REACTOME_SIGNALING_BY_FGFR1_FUSION_MUTANTS	REACTOME	0.485207	0.605934	1
REACTOME_METABOLISM_OF_LIPIDS_AND_LIPOPROTEINS	REACTOME	0.491018	0.629666	1
REACTOME_CYTOSOLIC_TRNA_AMINOACYLATION	REACTOME	0.496994	0.525106	1
REACTOME_S_PHASE	REACTOME	0.501984	0.574648	1
REACTOME_PROCESSIVE_SYNTHESIS_ON_THE_LAGGING_STRAND	REACTOME	0.503922	0.564243	1
REACTOME_FATTY_ACYL_COA_BIOSYNTHESIS	REACTOME	0.505837	0.638984	1
REACTOME_ACTIVATION_OF_ATR_IN_RESPONSE_TO_REPLICATION_STRESS	REACTOME	0.505976	0.564113	1
REACTOME_ANTIGEN_PROCESSING_UBIQUITINATION_PROTEASOME_DEGRADATION	REACTOME	0.506073	0.648863	1
REACTOME_ANTIVIRAL_MECHANISM_BY_IFN_STIMULATED_GENES	REACTOME	0.506903	0.575311	1
REACTOME_HOST_INTERACTIONS_OF_HIV_FACTORS	REACTOME	0.513779	0.627837	1
REACTOME_GLUCOSE_METABOLISM	REACTOME	0.516129	0.616868	1
REACTOME_IL_3_5_AND_GM_CSF_SIGNALING	REACTOME	0.527668	0.659655	1
REACTOME_G_ALPHA_S_SIGNALLING_EVENTS	REACTOME	0.529297	0.650636	1
REACTOME_MRNA_CAPPING	REACTOME	0.529532	0.599873	1
REACTOME_SIGNALING_BY_CONSTITUTIVELY_ACTIVE_EGFR	REACTOME	0.531062	0.627939	1
REACTOME_APC_C_CDC20_MEDIATED_DEGRADATION_OF_MITOTIC_PROTEINS	REACTOME	0.532129	0.645481	1
REACTOME_REGULATION_OF_APOPTOSIS	REACTOME	0.534274	0.6608	1
REACTOME_PROLONGED_ERK_ACTIVATION_EVENTS	REACTOME	0.534381	0.612299	1
REACTOME_SYNTHESIS_OF_DNA	REACTOME	0.536	0.605128	1
REACTOME_TRNA_AMINOACYLATION	REACTOME	0.540323	0.601308	1
REACTOME_TRANSFERRIN_ENDOCYTOSIS_AND_RECYCLING	REACTOME	0.541414	0.628824	1
REACTOME_CLASS_B_2_SECRETIN_FAMILY_RECEPTORS	REACTOME	0.542406	0.640303	1
REACTOME_TRIGLYCERIDE_BIOSYNTHESIS	REACTOME	0.548193	0.640736	1
REACTOME_GLUCAGON_TYPE_LIGAND_RECEPTORS	REACTOME	0.549618	0.656251	1
REACTOME_RESOLUTION_OF_AP_SITES_VIA_THE_MULTIPLE_NUCLEOTIDE_PATCH_REPLACEMENT_PATHWAY	REACTOME	0.552209	0.611103	1
REACTOME_CROSS_PRESENTATION_OF_SOLUBLE_EXOGENOUS_ANTIGENS_ENDOSOMES	REACTOME	0.552632	0.716462	1
REACTOME_LAGGING_STRAND_SYNTHESIS	REACTOME	0.554902	0.58775	1
REACTOME_FORMATION_OF_THE_HIV1_EARLY_ELONGATION_COMPLEX	REACTOME	0.56	0.605372	1
REACTOME_TRANSCRIPTION_COUPLED_NER_TC_NER	REACTOME	0.56	0.61108	1
REACTOME_EXTENSION_OF_TELOMERES	REACTOME	0.560158	0.611358	1
REACTOME_CYTOKINE_SIGNALING_IN_IMMUNE_SYSTEM	REACTOME	0.564103	0.661389	1
REACTOME_BASE_EXCISION_REPAIR	REACTOME	0.566	0.61221	1
REACTOME_ANTIGEN_PROCESSING_CROSS_PRESENTATION	REACTOME	0.566265	0.6616	1
REACTOME_NUCLEAR_SIGNALING_BY_ERBB4	REACTOME	0.566596	0.658212	1
REACTOME_PKB_MEDIATED_EVENTS	REACTOME	0.57	0.65995	1
REACTOME_SIGNALING_BY_THE_B_CELL_RECEPTOR_BCR	REACTOME	0.586481	0.662152	1
REACTOME_PEROXISOMAL_LIPID_METABOLISM	REACTOME	0.592742	0.692956	1
REACTOME_GLYCOLYSIS	REACTOME	0.597585	0.692026	1
REACTOME_OXYGEN_DEPENDENT_PROLINE_HYDROXYLATION_OF_HYPOXIA_INDUCIBLE_FACTOR_ALPHA	REACTOME	0.59802	0.697996	1
REACTOME_M_G1_TRANSITION	REACTOME	0.6	0.684326	1
REACTOME_RESPIRATORY_ELECTRON_TRANSPORT_ATP_SYNTHESIS_BY_CHEMIOSMOTIC_COUPLING_AND_HEAT_PRODUCTION_BY_UNCOUPLING_PROTEINS_	REACTOME	0.602386	0.658272	1
REACTOME_MITOCHONDRIAL_TRNA_AMINOACYLATION	REACTOME	0.603659	0.710461	1
REACTOME_APC_C_CDH1_MEDIATED_DEGRADATION_OF_CDC20_AND_OTHER_APC_C_CDH1_TARGETED_PROTEINS_IN_LATE_MITOSIS_EARLY_G1	REACTOME	0.611222	0.720945	1
REACTOME_SYNTHESIS_OF_PA	REACTOME	0.611336	0.658217	1
REACTOME_PURINE_METABOLISM	REACTOME	0.614919	0.706089	1
REACTOME_ENERGY_DEPENDENT_REGULATION_OF_MTOR_BY_LKB1_AMPK	REACTOME	0.615842	0.711952	1
REACTOME_REGULATION_OF_IFNA_SIGNALING	REACTOME	0.617357	0.66418	1
REACTOME_REGULATORY_RNA_PATHWAYS	REACTOME	0.617886	0.662404	1
REACTOME_METABOLISM_OF_NUCLEOTIDES	REACTOME	0.618182	0.705698	1
REACTOME_INTERFERON_SIGNALING	REACTOME	0.622266	0.709939	1
REACTOME_ORC1_REMOVAL_FROM_CHROMATIN	REACTOME	0.626775	0.70652	1
REACTOME_ABORTIVE_ELONGATION_OF_HIV1_TRANSCRIPT_IN_THE_ABSENCE_OF_TAT	REACTOME	0.627812	0.718203	1
REACTOME_HIV_INFECTION	REACTOME	0.640816	0.717535	1
REACTOME_INTERACTIONS_OF_VPR_WITH_HOST_CELLULAR_PROTEINS	REACTOME	0.64257	0.718333	1
REACTOME_SYNTHESIS_OF_PIPS_AT_THE_GOLGI_MEMBRANE	REACTOME	0.650295	0.662871	1
REACTOME_ACYL_CHAIN_REMODELLING_OF_PI	REACTOME	0.650406	0.690928	1
REACTOME_FORMATION_OF_TRANSCRIPTION_COUPLED_NER_TC_NER_REPAIR_COMPLEX	REACTOME	0.664671	0.7385	1
REACTOME_FORMATION_OF_ATP_BY_CHEMIOSMOTIC_COUPLING	REACTOME	0.669941	0.702497	1
REACTOME_CIRCADIAN_REPRESSION_OF_EXPRESSION_BY_REV_ERBA	REACTOME	0.678208	0.780631	1
REACTOME_RESPIRATORY_ELECTRON_TRANSPORT	REACTOME	0.692308	0.746919	1
REACTOME_SIGNALING_BY_FGFR_MUTANTS	REACTOME	0.692929	0.720064	1
REACTOME_DOWNSTREAM_SIGNALING_EVENTS_OF_B_CELL_RECEPTOR_BCR	REACTOME	0.695565	0.794773	1
REACTOME_TRANSPORT_OF_RIBONUCLEOPROTEINS_INTO_THE_HOST_NUCLEUS	REACTOME	0.696	0.783722	1
REACTOME_SYNTHESIS_OF_PC	REACTOME	0.699597	0.78396	1
REACTOME_MICRORNA_MIRNA_BIOGENESIS	REACTOME	0.704082	0.783652	1
REACTOME_ACTIVATED_TAK1_MEDIATES_P38_MAPK_ACTIVATION	REACTOME	0.707661	0.761373	1
REACTOME_INFLUENZA_LIFE_CYCLE	REACTOME	0.716	0.841428	1
REACTOME_ASSEMBLY_OF_THE_PRE_REPLICATIVE_COMPLEX	REACTOME	0.717213	0.851792	1
REACTOME_TRANSCRIPTION	REACTOME	0.733598	0.791162	1
REACTOME_TRANSPORT_OF_MATURE_MRNA_DERIVED_FROM_AN_INTRONLESS_TRANSCRIPT	REACTOME	0.739919	0.858826	1
REACTOME_CYCLIN_E_ASSOCIATED_EVENTS_DURING_G1_S_TRANSITION_	REACTOME	0.741803	0.824908	1
REACTOME_INTERFERON_GAMMA_SIGNALING	REACTOME	0.746562	0.758443	1
REACTOME_GLUCOSE_TRANSPORT	REACTOME	0.752515	0.846721	1
REACTOME_NOTCH1_INTRACELLULAR_DOMAIN_REGULATES_TRANSCRIPTION	REACTOME	0.758823	0.785662	1
REACTOME_DEADENYLATION_OF_MRNA	REACTOME	0.764	0.907086	1
REACTOME_NEP_NS2_INTERACTS_WITH_THE_CELLULAR_EXPORT_MACHINERY	REACTOME	0.764471	0.849927	1
REACTOME_RORA_ACTIVATES_CIRCADIAN_EXPRESSION	REACTOME	0.771255	0.862108	1
REACTOME_RNA_POL_II_TRANSCRIPTION_PRE_INITIATION_AND_PROMOTER_OPENING	REACTOME	0.778234	0.883374	1
REACTOME_RNA_POL_III_TRANSCRIPTION_TERMINATION	REACTOME	0.786307	0.860481	1
REACTOME_ACTIVATED_AMPK_STIMULATES_FATTY_ACID_OXIDATION_IN_MUSCLE	REACTOME	0.790224	0.859415	1
REACTOME_IMMUNOREGULATORY_INTERACTIONS_BETWEEN_A_LYMPHOID_AND_A_NON_LYMPHOID_CELL	REACTOME	0.79596	0.852362	1
REACTOME_SMAD2_SMAD3_SMAD4_HETEROTRIMER_REGULATES_TRANSCRIPTION	REACTOME	0.8	0.846176	1
REACTOME_GENERIC_TRANSCRIPTION_PATHWAY	REACTOME	0.80198	0.790554	1
REACTOME_HIV_LIFE_CYCLE	REACTOME	0.812757	0.932771	1
REACTOME_NONSENSE_MEDIATED_DECAY_ENHANCED_BY_THE_EXON_JUNCTION_COMPLEX	REACTOME	0.813906	0.903133	1
REACTOME_SHC_MEDIATED_CASCADE	REACTOME	0.820202	0.851693	1
REACTOME_VOLTAGE_GATED_POTASSIUM_CHANNELS	REACTOME	0.822485	0.860632	1
REACTOME_ANTIGEN_PRESENTATION_FOLDING_ASSEMBLY_AND_PEPTIDE_LOADING_OF_CLASS_I_MHC	REACTOME	0.824242	0.896026	1
REACTOME_SIGNALING_BY_WNT	REACTOME	0.832016	0.974671	1
REACTOME_DESTABILIZATION_OF_MRNA_BY_KSRP	REACTOME	0.834694	0.86931	1
REACTOME_TRANSLATION	REACTOME	0.857442	0.953388	1
REACTOME_SCFSKP2_MEDIATED_DEGRADATION_OF_P27_P21	REACTOME	0.870968	0.961282	1
REACTOME_REGULATION_OF_GLUCOKINASE_BY_GLUCOKINASE_REGULATORY_PROTEIN	REACTOME	0.871744	0.954435	1
REACTOME_SCF_BETA_TRCP_MEDIATED_DEGRADATION_OF_EMI1	REACTOME	0.881526	0.987053	1
REACTOME_CDT1_ASSOCIATION_WITH_THE_CDC6_ORC_ORIGIN_COMPLEX	REACTOME	0.894628	0.99282	1
REACTOME_TRANSPORT_OF_MATURE_TRANSCRIPT_TO_CYTOPLASM	REACTOME	0.899606	0.995128	1
REACTOME_LATE_PHASE_OF_HIV_LIFE_CYCLE	REACTOME	0.901841	0.992655	1
REACTOME_ACTIVATION_OF_THE_MRNA_UPON_BINDING_OF_THE_CAP_BINDING_COMPLEX_AND_EIFS_AND_SUBSEQUENT_BINDING_TO_43S	REACTOME	0.913131	0.959183	1
REACTOME_METABOLISM_OF_NON_CODING_RNA	REACTOME	0.915323	1	1
REACTOME_DEADENYLATION_DEPENDENT_MRNA_DECAY	REACTOME	0.921529	0.994854	1
REACTOME_P53_INDEPENDENT_G1_S_DNA_DAMAGE_CHECKPOINT	REACTOME	0.922465	1	1
REACTOME_METABOLISM_OF_MRNA	REACTOME	0.924152	1	1
REACTOME_FGFR_LIGAND_BINDING_AND_ACTIVATION	REACTOME	0.924644	0.947385	1
REACTOME_REGULATION_OF_MRNA_STABILITY_BY_PROTEINS_THAT_BIND_AU_RICH_ELEMENTS	REACTOME	0.92986	1	1
REACTOME_FORMATION_OF_THE_TERNARY_COMPLEX_AND_SUBSEQUENTLY_THE_43S_COMPLEX	REACTOME	0.935614	0.93353	1
REACTOME_AUTODEGRADATION_OF_CDH1_BY_CDH1_APC_C	REACTOME	0.93865	0.998988	1
REACTOME_MRNA_PROCESSING	REACTOME	0.938976	0.999673	1
REACTOME_METABOLISM_OF_RNA	REACTOME	0.947262	1	1
REACTOME_RNA_POL_III_CHAIN_ELONGATION	REACTOME	0.957055	0.993383	1
REACTOME_P53_DEPENDENT_G1_DNA_DAMAGE_RESPONSE	REACTOME	0.963115	1	1
REACTOME_GENERATION_OF_SECOND_MESSENGER_MOLECULES	REACTOME	0.968379	0.976982	1
REACTOME_REGULATION_OF_ORNITHINE_DECARBOXYLASE_ODC	REACTOME	0.97732	0.996584	1
REACTOME_CDK_MEDIATED_PHOSPHORYLATION_AND_REMOVAL_OF_CDC6	REACTOME	0.979424	0.999003	1
REACTOME_TCR_SIGNALING	REACTOME	0.981633	0.894983	1
