# Supplementary material for: Generation of human hepatic progenitor cells with regenerative and metabolic capacities from primary hepatocytes
Source: eLife. 2019 Aug 8;8:e47313. doi: 10.7554/eLife.47313 (PMC6731094; doi:10.7554/eLife.47313)
Supplement: Supplementary file 4. [file elife-47313-supp4.xlsx]

## Sheet: Sheet1
Supplementary file 4. Significantly enriched gene sets (Nom p < 0.05) in Hep-i(+) cells compared with Hep-i(-) cells (assessed by GSEA)
NAME	Data base	NOM p-val	FDR q-val	FWER p-val
HALLMARK_BILE_ACID_METABOLISM	HALLMARK	0	0	0
HALLMARK_XENOBIOTIC_METABOLISM	HALLMARK	0	0	0
HALLMARK_INTERFERON_ALPHA_RESPONSE	HALLMARK	0	0.00203192	0.009
HALLMARK_INTERFERON_GAMMA_RESPONSE	HALLMARK	0	0.00442154	0.025
HALLMARK_IL6_JAK_STAT3_SIGNALING	HALLMARK	0.0017301	0.00449853	0.032
HALLMARK_FATTY_ACID_METABOLISM	HALLMARK	0.00328947	0.0171746	0.134
HALLMARK_OXIDATIVE_PHOSPHORYLATION	HALLMARK	0.00816993	0.0540548	0.47
HALLMARK_ALLOGRAFT_REJECTION	HALLMARK	0.00825082	0.055827	0.438
HALLMARK_MTORC1_SIGNALING	HALLMARK	0.0194489	0.0929083	0.688
HALLMARK_INFLAMMATORY_RESPONSE	HALLMARK	0.0352564	0.103646	0.77
KEGG_ANTIGEN_PROCESSING_AND_PRESENTATION	KEGG	0	0	0
KEGG_INTESTINAL_IMMUNE_NETWORK_FOR_IGA_PRODUCTION	KEGG	0	0.00458059	0.01
KEGG_VIRAL_MYOCARDITIS	KEGG	0	0.00776615	0.024
KEGG_GRAFT_VERSUS_HOST_DISEASE	KEGG	0	0.00676076	0.028
KEGG_ASTHMA	KEGG	0	0.00690804	0.036
KEGG_ALLOGRAFT_REJECTION	KEGG	0	0.00590976	0.037
KEGG_AUTOIMMUNE_THYROID_DISEASE	KEGG	0	0.00564336	0.041
KEGG_TYPE_I_DIABETES_MELLITUS	KEGG	0	0.00546119	0.045
KEGG_HEMATOPOIETIC_CELL_LINEAGE	KEGG	0	0.00900959	0.071
KEGG_HISTIDINE_METABOLISM	KEGG	0	0.00912613	0.075
KEGG_CELL_ADHESION_MOLECULES_CAMS	KEGG	0	0.0216824	0.221
KEGG_GLYCOLYSIS_GLUCONEOGENESIS	KEGG	0	0.027549	0.29
KEGG_ALANINE_ASPARTATE_AND_GLUTAMATE_METABOLISM	KEGG	0	0.0276206	0.31
KEGG_LEISHMANIA_INFECTION	KEGG	0.0019802	0.0242437	0.242
KEGG_TYROSINE_METABOLISM	KEGG	0.00208768	0.0320088	0.359
KEGG_PEROXISOME	KEGG	0.00387597	0.0216836	0.213
KEGG_NITROGEN_METABOLISM	KEGG	0.00387597	0.0667475	0.598
KEGG_SYSTEMIC_LUPUS_ERYTHEMATOSUS	KEGG	0.00403226	0.0216411	0.193
KEGG_BETA_ALANINE_METABOLISM	KEGG	0.00598802	0.0120741	0.103
KEGG_PRIMARY_IMMUNODEFICIENCY	KEGG	0.00817996	0.0596758	0.562
KEGG_PHENYLALANINE_METABOLISM	KEGG	0.00823045	0.100397	0.743
KEGG_ARGININE_AND_PROLINE_METABOLISM	KEGG	0.00831601	0.0294258	0.335
KEGG_PRIMARY_BILE_ACID_BIOSYNTHESIS	KEGG	0.0101626	0.077654	0.649
KEGG_GLYCINE_SERINE_AND_THREONINE_METABOLISM	KEGG	0.014433	0.0611306	0.54
KEGG_NICOTINATE_AND_NICOTINAMIDE_METABOLISM	KEGG	0.0146138	0.0614545	0.556
KEGG_VALINE_LEUCINE_AND_ISOLEUCINE_DEGRADATION	KEGG	0.0376984	0.0835647	0.676
KEGG_OLFACTORY_TRANSDUCTION	KEGG	0.0397614	0.167869	0.879
REACTOME_DOWNSTREAM_TCR_SIGNALING	REACTOME	0	0.001	0
REACTOME_GENERATION_OF_SECOND_MESSENGER_MOLECULES	REACTOME	0	0.00241355	0.005
REACTOME_TCR_SIGNALING	REACTOME	0	0.00595767	0.019
REACTOME_PD1_SIGNALING	REACTOME	0	0.0611289	0.162
REACTOME_PHOSPHORYLATION_OF_CD3_AND_TCR_ZETA_CHAINS	REACTOME	0	0.0846486	0.232
REACTOME_METABOLISM_OF_AMINO_ACIDS_AND_DERIVATIVES	REACTOME	0	0.101589	0.289
REACTOME_COSTIMULATION_BY_THE_CD28_FAMILY	REACTOME	0	0.105197	0.338
REACTOME_INTERFERON_GAMMA_SIGNALING	REACTOME	0	0.0990724	0.371
REACTOME_TRIGLYCERIDE_BIOSYNTHESIS	REACTOME	0	0.107803	0.423
REACTOME_GLYCEROPHOSPHOLIPID_BIOSYNTHESIS	REACTOME	0.00205339	0.372381	0.961
REACTOME_TRANSPORT_TO_THE_GOLGI_AND_SUBSEQUENT_MODIFICATION	REACTOME	0.00210526	0.100093	0.354
REACTOME_NUCLEOTIDE_BINDING_DOMAIN_LEUCINE_RICH_REPEAT_CONTAINING_RECEPTOR_NLR_SIGNALING_PATHWAYS	REACTOME	0.00400802	0.403143	0.993
REACTOME_CLASS_B_2_SECRETIN_FAMILY_RECEPTORS	REACTOME	0.00411523	0.455424	1
REACTOME_PLATELET_HOMEOSTASIS	REACTOME	0.00414938	0.418343	1
REACTOME_METABOLISM_OF_VITAMINS_AND_COFACTORS	REACTOME	0.00821355	0.135112	0.543
REACTOME_GLUCONEOGENESIS	REACTOME	0.012024	0.209574	0.697
REACTOME_ENDOGENOUS_STEROLS	REACTOME	0.0121457	0.279125	0.869
REACTOME_TRANSPORT_OF_VITAMINS_NUCLEOSIDES_AND_RELATED_MOLECULES	REACTOME	0.01222	0.253435	0.825
REACTOME_SYNTHESIS_OF_BILE_ACIDS_AND_BILE_SALTS	REACTOME	0.0123711	0.272321	0.852
REACTOME_MHC_CLASS_II_ANTIGEN_PRESENTATION	REACTOME	0.0133843	0.385499	0.972
REACTOME_GLUCOSE_METABOLISM	REACTOME	0.0163934	0.224445	0.732
REACTOME_SYNTHESIS_SECRETION_AND_INACTIVATION_OF_GLP1	REACTOME	0.0183673	0.239032	0.769
REACTOME_ACYL_CHAIN_REMODELLING_OF_PI	REACTOME	0.0217822	0.267634	0.87
REACTOME_ACYL_CHAIN_REMODELLING_OF_PS	REACTOME	0.0224033	0.312776	0.943
REACTOME_INCRETIN_SYNTHESIS_SECRETION_AND_INACTIVATION	REACTOME	0.0241449	0.279755	0.907
REACTOME_OLFACTORY_SIGNALING_PATHWAY	REACTOME	0.026749	0.364879	0.956
REACTOME_TRANSMEMBRANE_TRANSPORT_OF_SMALL_MOLECULES	REACTOME	0.0270793	0.478589	1
REACTOME_IRON_UPTAKE_AND_TRANSPORT	REACTOME	0.028169	0.261025	0.853
REACTOME_COMPLEMENT_CASCADE	REACTOME	0.0314465	0.301804	0.931
REACTOME_SLC_MEDIATED_TRANSMEMBRANE_TRANSPORT	REACTOME	0.0319361	0.394217	0.981
REACTOME_CYTOKINE_SIGNALING_IN_IMMUNE_SYSTEM	REACTOME	0.0364683	0.471134	1
REACTOME_INNATE_IMMUNE_SYSTEM	REACTOME	0.0371134	0.403704	0.994
REACTOME_PYRIMIDINE_METABOLISM	REACTOME	0.0375	0.234557	0.786
REACTOME_SYNTHESIS_OF_BILE_ACIDS_AND_BILE_SALTS_VIA_7ALPHA_HYDROXYCHOLESTEROL	REACTOME	0.0392562	0.368092	0.973
REACTOME_SYNTHESIS_OF_PA	REACTOME	0.0396226	0.378252	0.973
REACTOME_REGULATION_OF_GENE_EXPRESSION_IN_BETA_CELLS	REACTOME	0.0411523	0.404269	0.994
REACTOME_SULFUR_AMINO_ACID_METABOLISM	REACTOME	0.0422535	0.422533	0.981
REACTOME_BILE_ACID_AND_BILE_SALT_METABOLISM	REACTOME	0.0469388	0.269466	0.883
REACTOME_INTERFERON_SIGNALING	REACTOME	0.0486381	0.387025	0.984
REACTOME_TRANSPORT_OF_GLUCOSE_AND_OTHER_SUGARS_BILE_SALTS_AND_ORGANIC_ACIDS_METAL_IONS_AND_AMINE_COMPOUNDS	REACTOME	0.0489796	0.394705	0.987
