# Supplementary material for: Generation of human hepatic progenitor cells with regenerative and metabolic capacities from primary hepatocytes
Source: eLife. 2019 Aug 8;8:e47313. doi: 10.7554/eLife.47313 (PMC6731094; doi:10.7554/eLife.47313)
Supplement: Supplementary file 5. [file elife-47313-supp5.xlsx]

## Sheet: Sheet1
Supplementary file 5. Significantly enriched gene sets (Nom p < 0.05) in Hep-i(-) cells compared with Hep-i(+) cells (assessed by GSEA)
NAME	Data base	NOM p-val	FDR q-val	FWER p-val
HALLMARK_EPITHELIAL_MESENCHYMAL_TRANSITION	HALLMARK	0	0	0
HALLMARK_MITOTIC_SPINDLE	HALLMARK	0	0	0
HALLMARK_TGF_BETA_SIGNALING	HALLMARK	0	0	0
HALLMARK_UV_RESPONSE_DN	HALLMARK	0	0	0
HALLMARK_APICAL_JUNCTION	HALLMARK	0	0	0
HALLMARK_TNFA_SIGNALING_VIA_NFKB	HALLMARK	0	0.000809769	0.003
HALLMARK_WNT_BETA_CATENIN_SIGNALING	HALLMARK	0	0.000694088	0.003
HALLMARK_MYOGENESIS	HALLMARK	0	0.00089175	0.005
HALLMARK_NOTCH_SIGNALING	HALLMARK	0	0.000792667	0.005
HALLMARK_G2M_CHECKPOINT	HALLMARK	0	0.000874511	0.006
HALLMARK_APOPTOSIS	HALLMARK	0	0.00695265	0.05
HALLMARK_KRAS_SIGNALING_UP	HALLMARK	0	0.00915188	0.071
HALLMARK_E2F_TARGETS	HALLMARK	0	0.00932743	0.078
HALLMARK_ANDROGEN_RESPONSE	HALLMARK	0	0.0109614	0.098
HALLMARK_IL2_STAT5_SIGNALING	HALLMARK	0	0.0226532	0.244
HALLMARK_P53_PATHWAY	HALLMARK	0.00246305	0.0123213	0.118
HALLMARK_ESTROGEN_RESPONSE_EARLY	HALLMARK	0.0117925	0.0337916	0.376
HALLMARK_PROTEIN_SECRETION	HALLMARK	0.0154242	0.0238388	0.269
HALLMARK_ANGIOGENESIS	HALLMARK	0.0340136	0.0153959	0.155
HALLMARK_HEDGEHOG_SIGNALING	HALLMARK	0.04329	0.0158824	0.171
KEGG_REGULATION_OF_ACTIN_CYTOSKELETON	KEGG	0	0.231286	0.163
KEGG_SMALL_CELL_LUNG_CANCER	KEGG	0	0.161958	0.218
KEGG_GLIOMA	KEGG	0	0.113902	0.229
KEGG_TGF_BETA_SIGNALING_PATHWAY	KEGG	0	0.0837399	0.464
KEGG_MELANOGENESIS	KEGG	0	0.079717	0.478
KEGG_BASAL_CELL_CARCINOMA	KEGG	0	0.0729695	0.494
KEGG_PHOSPHATIDYLINOSITOL_SIGNALING_SYSTEM	KEGG	0	0.0721795	0.511
KEGG_HEDGEHOG_SIGNALING_PATHWAY	KEGG	0	0.0643237	0.538
KEGG_CALCIUM_SIGNALING_PATHWAY	KEGG	0	0.147526	0.886
KEGG_PATHWAYS_IN_CANCER	KEGG	0.00196078	0.114418	0.778
KEGG_GAP_JUNCTION	KEGG	0.0020202	0.0747037	0.583
KEGG_ADHERENS_JUNCTION	KEGG	0.003861	0.0677621	0.512
KEGG_ARRHYTHMOGENIC_RIGHT_VENTRICULAR_CARDIOMYOPATHY_ARVC	KEGG	0.00401606	0.071641	0.376
KEGG_DILATED_CARDIOMYOPATHY	KEGG	0.0040404	0.0750258	0.323
KEGG_PROSTATE_CANCER	KEGG	0.00404858	0.0659846	0.521
KEGG_FOCAL_ADHESION	KEGG	0.00575816	0.064987	0.26
KEGG_ENDOMETRIAL_CANCER	KEGG	0.00584795	0.07336	0.248
KEGG_FC_GAMMA_R_MEDIATED_PHAGOCYTOSIS	KEGG	0.00612245	0.0992212	0.704
KEGG_MELANOMA	KEGG	0.00790514	0.0800311	0.376
KEGG_WNT_SIGNALING_PATHWAY	KEGG	0.00988142	0.114766	0.794
KEGG_INOSITOL_PHOSPHATE_METABOLISM	KEGG	0.00992064	0.103461	0.739
KEGG_ACUTE_MYELOID_LEUKEMIA	KEGG	0.0118577	0.111611	0.783
KEGG_TIGHT_JUNCTION	KEGG	0.0122449	0.0671664	0.534
KEGG_AXON_GUIDANCE	KEGG	0.0123203	0.102422	0.7
KEGG_NON_SMALL_CELL_LUNG_CANCER	KEGG	0.0123967	0.129878	0.83
KEGG_VASOPRESSIN_REGULATED_WATER_REABSORPTION	KEGG	0.0162602	0.104443	0.69
KEGG_CHRONIC_MYELOID_LEUKEMIA	KEGG	0.020202	0.0768169	0.486
KEGG_VASCULAR_SMOOTH_MUSCLE_CONTRACTION	KEGG	0.020202	0.130346	0.827
KEGG_UBIQUITIN_MEDIATED_PROTEOLYSIS	KEGG	0.020284	0.139063	0.856
KEGG_RENAL_CELL_CARCINOMA	KEGG	0.0209924	0.104549	0.694
KEGG_LONG_TERM_POTENTIATION	KEGG	0.0255403	0.141085	0.867
KEGG_HYPERTROPHIC_CARDIOMYOPATHY_HCM	KEGG	0.0258449	0.0952894	0.704
KEGG_SNARE_INTERACTIONS_IN_VESICULAR_TRANSPORT	KEGG	0.027668	0.090476	0.46
KEGG_ECM_RECEPTOR_INTERACTION	KEGG	0.0325048	0.101577	0.745
KEGG_MAPK_SIGNALING_PATHWAY	KEGG	0.0338645	0.192367	0.937
KEGG_APOPTOSIS	KEGG	0.039749	0.14298	0.871
KEGG_SPLICEOSOME	KEGG	0.041502	0.0875845	0.233
KEGG_LEUKOCYTE_TRANSENDOTHELIAL_MIGRATION	KEGG	0.0430528	0.245236	0.987
REACTOME_ACTIVATION_OF_CHAPERONE_GENES_BY_XBP1S	REACTOME	0	0.160781	0.086
REACTOME_SYNTHESIS_OF_PIPS_AT_THE_PLASMA_MEMBRANE	REACTOME	0	0.244445	0.239
REACTOME_AXON_GUIDANCE	REACTOME	0	0.216193	0.274
REACTOME_SEMAPHORIN_INTERACTIONS	REACTOME	0	0.186054	0.291
REACTOME_SIGNALING_BY_BMP	REACTOME	0	0.164105	0.336
REACTOME_SIGNALING_BY_TGF_BETA_RECEPTOR_COMPLEX	REACTOME	0	0.148417	0.347
REACTOME_SIGNALING_BY_FGFR_MUTANTS	REACTOME	0	0.174082	0.639
REACTOME_APOPTOSIS	REACTOME	0	0.164138	0.678
REACTOME_DEVELOPMENTAL_BIOLOGY	REACTOME	0	0.160638	0.689
REACTOME_SIGNALING_BY_FGFR_IN_DISEASE	REACTOME	0	0.177025	0.802
REACTOME_SIGNALING_BY_PDGF	REACTOME	0.00198413	0.163837	0.551
REACTOME_OTHER_SEMAPHORIN_INTERACTIONS	REACTOME	0.00201613	0.17015	0.675
REACTOME_UNFOLDED_PROTEIN_RESPONSE	REACTOME	0.00202429	0.164894	0.685
REACTOME_DEADENYLATION_OF_MRNA	REACTOME	0.00203666	0.24537	0.178
REACTOME_CELL_CELL_COMMUNICATION	REACTOME	0.00204499	0.170454	0.787
REACTOME_FRS2_MEDIATED_CASCADE	REACTOME	0.00205339	0.194781	0.511
REACTOME_SIGNALING_BY_FGFR	REACTOME	0.00207039	0.177422	0.815
REACTOME_GLUTAMATE_NEUROTRANSMITTER_RELEASE_CYCLE	REACTOME	0.00209205	0.180688	0.54
REACTOME_NCAM_SIGNALING_FOR_NEURITE_OUT_GROWTH	REACTOME	0.00410678	0.154613	0.38
REACTOME_CELL_JUNCTION_ORGANIZATION	REACTOME	0.00411523	0.164352	0.738
REACTOME_SIGNALING_BY_CONSTITUTIVELY_ACTIVE_EGFR	REACTOME	0.00412371	0.213896	0.491
REACTOME_DOWNSTREAM_SIGNALING_OF_ACTIVATED_FGFR	REACTOME	0.00416667	0.188378	0.873
REACTOME_TIE2_SIGNALING	REACTOME	0.00422833	0.161412	0.563
REACTOME_MUSCLE_CONTRACTION	REACTOME	0.00592885	0.179331	0.322
REACTOME_SMOOTH_MUSCLE_CONTRACTION	REACTOME	0.00595238	0.169739	0.594
REACTOME_ACTIVATED_POINT_MUTANTS_OF_FGFR2	REACTOME	0.00601202	0.159864	0.738
REACTOME_SIGNALING_BY_EGFR_IN_CANCER	REACTOME	0.00630252	0.203285	0.937
REACTOME_APOPTOTIC_CLEAVAGE_OF_CELLULAR_PROTEINS	REACTOME	0.00632911	0.210615	0.511
REACTOME_PROTEOLYTIC_CLEAVAGE_OF_SNARE_COMPLEX_PROTEINS	REACTOME	0.00657895	0.173819	0.825
REACTOME_SIGNALING_BY_ROBO_RECEPTOR	REACTOME	0.00829876	0.15981	0.723
REACTOME_PHOSPHOLIPASE_C_MEDIATED_CASCADE	REACTOME	0.00845666	0.198016	0.924
REACTOME_BOTULINUM_NEUROTOXICITY	REACTOME	0.00863931	0.162006	0.75
REACTOME_PI_METABOLISM	REACTOME	0.010352	0.181055	0.636
REACTOME_SIGNALING_BY_INSULIN_RECEPTOR	REACTOME	0.0105042	0.198517	0.9
REACTOME_TRANSCRIPTIONAL_ACTIVITY_OF_SMAD2_SMAD3_SMAD4_HETEROTRIMER	REACTOME	0.0107296	0.175929	0.656
REACTOME_GASTRIN_CREB_SIGNALLING_PATHWAY_VIA_PKC_AND_MAPK	REACTOME	0.0123203	0.291347	0.991
REACTOME_GRB2_EVENTS_IN_ERBB2_SIGNALING	REACTOME	0.0126582	0.165721	0.768
REACTOME_APOPTOTIC_EXECUTION_PHASE	REACTOME	0.0130435	0.176502	0.82
REACTOME_CHONDROITIN_SULFATE_BIOSYNTHESIS	REACTOME	0.0137255	0.177252	0.798
REACTOME_NCAM1_INTERACTIONS	REACTOME	0.0158416	0.168996	0.541
REACTOME_DOWNSTREAM_SIGNAL_TRANSDUCTION	REACTOME	0.0159046	0.199521	0.915
REACTOME_INSULIN_RECEPTOR_SIGNALLING_CASCADE	REACTOME	0.0168421	0.191034	0.869
REACTOME_SHC1_EVENTS_IN_ERBB4_SIGNALING	REACTOME	0.0172786	0.165225	0.758
REACTOME_SIGNALING_BY_FGFR1_MUTANTS	REACTOME	0.0181818	0.195223	0.924
REACTOME_SHC1_EVENTS_IN_EGFR_SIGNALING	REACTOME	0.0184426	0.204385	0.893
REACTOME_DOWNREGULATION_OF_TGF_BETA_RECEPTOR_SIGNALING	REACTOME	0.01875	0.163138	0.712
REACTOME_EXTRACELLULAR_MATRIX_ORGANIZATION	REACTOME	0.0199601	0.298509	0.992
REACTOME_DOWNREGULATION_OF_SMAD2_3_SMAD4_TRANSCRIPTIONAL_ACTIVITY	REACTOME	0.0207469	0.173002	0.832
REACTOME_PI_3K_CASCADE	REACTOME	0.0218688	0.215602	0.949
REACTOME_G_ALPHA_Q_SIGNALLING_EVENTS	REACTOME	0.0222222	0.353291	0.998
REACTOME_ADHERENS_JUNCTIONS_INTERACTIONS	REACTOME	0.0229167	0.2311	0.972
REACTOME_NOTCH1_INTRACELLULAR_DOMAIN_REGULATES_TRANSCRIPTION	REACTOME	0.0253411	0.17106	0.835
REACTOME_TGF_BETA_RECEPTOR_SIGNALING_ACTIVATES_SMADS	REACTOME	0.0264766	0.176059	0.67
REACTOME_CELL_CELL_JUNCTION_ORGANIZATION	REACTOME	0.0286885	0.236853	0.977
REACTOME_SHC_MEDIATED_CASCADE	REACTOME	0.0292276	0.200485	0.907
REACTOME_SIGNALING_BY_SCF_KIT	REACTOME	0.030303	0.232684	0.975
REACTOME_TRANSMISSION_ACROSS_CHEMICAL_SYNAPSES	REACTOME	0.0304878	0.409883	1
REACTOME_NEPHRIN_INTERACTIONS	REACTOME	0.0311891	0.187747	0.528
REACTOME_COLLAGEN_FORMATION	REACTOME	0.0324427	0.234799	0.977
REACTOME_CHONDROITIN_SULFATE_DERMATAN_SULFATE_METABOLISM	REACTOME	0.0342052	0.202552	0.934
REACTOME_FORMATION_OF_THE_TERNARY_COMPLEX_AND_SUBSEQUENTLY_THE_43S_COMPLEX	REACTOME	0.0344828	0.199328	0.921
REACTOME_FGFR_LIGAND_BINDING_AND_ACTIVATION	REACTOME	0.0355649	0.214948	0.953
REACTOME_SIGNALING_BY_RHO_GTPASES	REACTOME	0.0360169	0.272159	0.988
REACTOME_PROLONGED_ERK_ACTIVATION_EVENTS	REACTOME	0.0361446	0.198654	0.904
REACTOME_DIABETES_PATHWAYS	REACTOME	0.0363636	0.234702	0.974
REACTOME_SIGNALING_BY_HIPPO	REACTOME	0.0371901	0.232359	0.975
REACTOME_SIGNALING_BY_NOTCH	REACTOME	0.0386965	0.217798	0.947
REACTOME_SIGNALING_BY_ERBB4	REACTOME	0.0408163	0.312446	0.995
REACTOME_HEPARAN_SULFATE_HEPARIN_HS_GAG_METABOLISM	REACTOME	0.0412371	0.231484	0.975
REACTOME_POST_NMDA_RECEPTOR_ACTIVATION_EVENTS	REACTOME	0.0412371	0.246425	0.981
REACTOME_PI3K_CASCADE	REACTOME	0.0414938	0.232178	0.97
REACTOME_SIGNALING_BY_FGFR1_FUSION_MUTANTS	REACTOME	0.04158	0.220533	0.961
REACTOME_STRIATED_MUSCLE_CONTRACTION	REACTOME	0.0416667	0.205448	0.89
REACTOME_SIGNALING_BY_NOTCH1	REACTOME	0.043222	0.216104	0.946
REACTOME_SEMA4D_IN_SEMAPHORIN_SIGNALING	REACTOME	0.0453608	0.215463	0.946
REACTOME_SMAD2_SMAD3_SMAD4_HETEROTRIMER_REGULATES_TRANSCRIPTION	REACTOME	0.0475162	0.200598	0.937
REACTOME_NETRIN1_SIGNALING	REACTOME	0.0491159	0.217955	0.952
