# Supplementary material for: Generation of human hepatic progenitor cells with regenerative and metabolic capacities from primary hepatocytes
Source: eLife. 2019 Aug 8;8:e47313. doi: 10.7554/eLife.47313 (PMC6731094; doi:10.7554/eLife.47313)
Supplement: Supplementary file 6. [file elife-47313-supp6.xlsx]

## Sheet: Sheet1
Supplementary file 6. Significantly enriched (NOM p < 0.05) gene sets in hCLiP-chimera-derived hepatocytes in comparison with PHHs
NAME	Data base	NOM p-val	FDR q-val	FWER p-val
HALLMARK_NOTCH_SIGNALING	HALLMARK	0	0.14523	0.114
HALLMARK_APICAL_SURFACE	HALLMARK	0	0.156936	0.214
HALLMARK_HYPOXIA	HALLMARK	0	0.233204	0.308
HALLMARK_KRAS_SIGNALING_DN	HALLMARK	0	0.214334	0.308
HALLMARK_COAGULATION	HALLMARK	0	0.188012	0.308
HALLMARK_HEDGEHOG_SIGNALING	HALLMARK	0	0.204123	0.402
HALLMARK_MYOGENESIS	HALLMARK	0	0.236927	0.519
KEGG_NITROGEN_METABOLISM	KEGG	0	1	0.431
KEGG_DORSO_VENTRAL_AXIS_FORMATION	KEGG	0	0.807	0.532
KEGG_RENIN_ANGIOTENSIN_SYSTEM	KEGG	0	0.67188	0.737
KEGG_GLYCOLYSIS_GLUCONEOGENESIS	KEGG	0	0.579893	0.737
KEGG_STEROID_HORMONE_BIOSYNTHESIS	KEGG	0	0.440642	0.737
KEGG_BUTANOATE_METABOLISM	KEGG	0	0.425092	0.737
KEGG_METABOLISM_OF_XENOBIOTICS_BY_CYTOCHROME_P450	KEGG	0	0.383859	0.737
KEGG_BASAL_CELL_CARCINOMA	KEGG	0	0.350873	0.737
KEGG_PROPANOATE_METABOLISM	KEGG	0	0.290768	0.737
KEGG_DRUG_METABOLISM_CYTOCHROME_P450	KEGG	0	0.312678	0.737
KEGG_GRAFT_VERSUS_HOST_DISEASE	KEGG	0	0.306005	0.737
KEGG_RETINOL_METABOLISM	KEGG	0	0.29787	0.737
KEGG_ARRHYTHMOGENIC_RIGHT_VENTRICULAR_CARDIOMYOPATHY_ARVC	KEGG	0	0.303221	0.737
KEGG_COMPLEMENT_AND_COAGULATION_CASCADES	KEGG	0	0.293497	0.737
KEGG_AUTOIMMUNE_THYROID_DISEASE	KEGG	0	0.319307	0.779
KEGG_ALPHA_LINOLENIC_ACID_METABOLISM	KEGG	0	0.349372	0.894
KEGG_MATURITY_ONSET_DIABETES_OF_THE_YOUNG	KEGG	0	0.352123	0.894
KEGG_GALACTOSE_METABOLISM	KEGG	0	0.345496	0.894
KEGG_STARCH_AND_SUCROSE_METABOLISM	KEGG	0	0.32447	0.894
KEGG_ASCORBATE_AND_ALDARATE_METABOLISM	KEGG	0	0.333083	0.894
KEGG_CELL_ADHESION_MOLECULES_CAMS	KEGG	0	0.32255	0.942
KEGG_ARACHIDONIC_ACID_METABOLISM	KEGG	0	0.316469	0.942
KEGG_TERPENOID_BACKBONE_BIOSYNTHESIS	KEGG	0	0.31436	0.942
KEGG_HEDGEHOG_SIGNALING_PATHWAY	KEGG	0	0.315731	0.942
KEGG_GLYCOSPHINGOLIPID_BIOSYNTHESIS_LACTO_AND_NEOLACTO_SERIES	KEGG	0	0.365633	0.942
KEGG_STEROID_BIOSYNTHESIS	KEGG	0	0.407548	0.942
REACTOME_PRE_NOTCH_PROCESSING_IN_GOLGI	REACTOME	0	0.456245	0.258
REACTOME_SYNTHESIS_OF_PA	REACTOME	0	0.495822	0.551
REACTOME_ACYL_CHAIN_REMODELLING_OF_PG	REACTOME	0	0.350548	0.551
REACTOME_AMINE_COMPOUND_SLC_TRANSPORTERS	REACTOME	0	0.54954	0.819
REACTOME_NA_CL_DEPENDENT_NEUROTRANSMITTER_TRANSPORTERS	REACTOME	0	1	0.913
REACTOME_GLYCOLYSIS	REACTOME	0	1	0.913
REACTOME_TRANSPORT_OF_VITAMINS_NUCLEOSIDES_AND_RELATED_MOLECULES	REACTOME	0	0.979646	0.913
REACTOME_ACYL_CHAIN_REMODELLING_OF_PS	REACTOME	0	0.858854	0.913
REACTOME_FORMATION_OF_FIBRIN_CLOT_CLOTTING_CASCADE	REACTOME	0	0.859956	0.913
REACTOME_BIOLOGICAL_OXIDATIONS	REACTOME	0	0.801319	0.913
REACTOME_CYTOCHROME_P450_ARRANGED_BY_SUBSTRATE_TYPE	REACTOME	0	0.807572	0.913
REACTOME_INTRINSIC_PATHWAY	REACTOME	0	0.760971	0.913
REACTOME_PHASE1_FUNCTIONALIZATION_OF_COMPOUNDS	REACTOME	0	0.740676	0.946
REACTOME_INTERACTION_BETWEEN_L1_AND_ANKYRINS	REACTOME	0	0.685945	0.946
REACTOME_ACYL_CHAIN_REMODELLING_OF_PC	REACTOME	0	0.69109	1
REACTOME_HS_GAG_BIOSYNTHESIS	REACTOME	0	0.69282	1
REACTOME_EFFECTS_OF_PIP2_HYDROLYSIS	REACTOME	0	0.731304	1
REACTOME_A_TETRASACCHARIDE_LINKER_SEQUENCE_IS_REQUIRED_FOR_GAG_SYNTHESIS	REACTOME	0	0.706851	1
REACTOME_ACYL_CHAIN_REMODELLING_OF_PE	REACTOME	0	0.683459	1
REACTOME_HEPARAN_SULFATE_HEPARIN_HS_GAG_METABOLISM	REACTOME	0	0.682227	1
REACTOME_HS_GAG_DEGRADATION	REACTOME	0	0.664482	1
REACTOME_PRE_NOTCH_EXPRESSION_AND_PROCESSING	REACTOME	0	0.660985	1
REACTOME_GRB2_SOS_PROVIDES_LINKAGE_TO_MAPK_SIGNALING_FOR_INTERGRINS_	REACTOME	0	0.669252	1
REACTOME_AMINE_DERIVED_HORMONES	REACTOME	0	0.655252	1
REACTOME_METABOLISM_OF_STEROID_HORMONES_AND_VITAMINS_A_AND_D	REACTOME	0	0.639264	1
REACTOME_ACYL_CHAIN_REMODELLING_OF_PI	REACTOME	0	0.62429	1
REACTOME_TRANSPORT_OF_GLUCOSE_AND_OTHER_SUGARS_BILE_SALTS_AND_ORGANIC_ACIDS_METAL_IONS_AND_AMINE_COMPOUNDS	REACTOME	0	0.619421	1
REACTOME_METABOLISM_OF_LIPIDS_AND_LIPOPROTEINS	REACTOME	0	0.60849	1
REACTOME_ANTIGEN_ACTIVATES_B_CELL_RECEPTOR_LEADING_TO_GENERATION_OF_SECOND_MESSENGERS	REACTOME	0	0.6869	1
REACTOME_STEROID_HORMONES	REACTOME	0	0.633679	1
REACTOME_RESPONSE_TO_ELEVATED_PLATELET_CYTOSOLIC_CA2_	REACTOME	0	0.623109	1
REACTOME_CLASS_B_2_SECRETIN_FAMILY_RECEPTORS	REACTOME	0	0.630617	1
REACTOME_GLUCAGON_TYPE_LIGAND_RECEPTORS	REACTOME	0	0.627321	1
REACTOME_CHOLESTEROL_BIOSYNTHESIS	REACTOME	0	0.614217	1
REACTOME_G_ALPHA_S_SIGNALLING_EVENTS	REACTOME	0	0.633541	1
REACTOME_PHOSPHOLIPID_METABOLISM	REACTOME	0	0.647698	1
Gene sets enriched in PHH compared compared with hCLiP-chimera-derived hepatocytes
NAME	Data base	NOM p-val	FDR q-val	FWER p-val
HALLMARK_MYC_TARGETS_V2	HALLMARK	0	0.403402	0.398
KEGG_PROTEIN_EXPORT	KEGG	0	0.989417	0.541
KEGG_CYTOSOLIC_DNA_SENSING_PATHWAY	KEGG	0	0.53489	0.595
KEGG_RNA_POLYMERASE	KEGG	0	0.692447	0.757
KEGG_SELENOAMINO_ACID_METABOLISM	KEGG	0	0.625766	0.757
KEGG_RIBOSOME	KEGG	0	0.83531	0.901
KEGG_PHOSPHATIDYLINOSITOL_SIGNALING_SYSTEM	KEGG	0	0.735722	0.901
KEGG_SPLICEOSOME	KEGG	0	0.672578	0.901
KEGG_JAK_STAT_SIGNALING_PATHWAY	KEGG	0	0.604821	0.901
KEGG_AMINOACYL_TRNA_BIOSYNTHESIS	KEGG	0	0.636066	0.949
KEGG_BASAL_TRANSCRIPTION_FACTORS	KEGG	0	0.59487	0.949
KEGG_RNA_DEGRADATION	KEGG	0	0.548086	0.949
REACTOME_INSULIN_RECEPTOR_RECYCLING	RACTOME	0	1	0.9
REACTOME_TRANSFERRIN_ENDOCYTOSIS_AND_RECYCLING	RACTOME	0	1	0.9
REACTOME_RNA_POL_III_CHAIN_ELONGATION	RACTOME	0	1	0.9
REACTOME_RNA_POL_III_TRANSCRIPTION_INITIATION_FROM_TYPE_2_PROMOTER	RACTOME	0	1	0.9
REACTOME_CD28_DEPENDENT_PI3K_AKT_SIGNALING	RACTOME	0	1	0.9
REACTOME_IRON_UPTAKE_AND_TRANSPORT	RACTOME	0	0.956503	0.9
REACTOME_PEPTIDE_CHAIN_ELONGATION	RACTOME	0	0.830092	0.9
REACTOME_SRP_DEPENDENT_COTRANSLATIONAL_PROTEIN_TARGETING_TO_MEMBRANE	RACTOME	0	0.832993	0.9
REACTOME_CD28_CO_STIMULATION	RACTOME	0	0.816323	0.9
REACTOME_DESTABILIZATION_OF_MRNA_BY_BRF1	RACTOME	0	0.75395	0.9
REACTOME_RNA_POL_III_TRANSCRIPTION_TERMINATION	RACTOME	0	0.74562	0.9
REACTOME_SYNTHESIS_SECRETION_AND_DEACYLATION_OF_GHRELIN	RACTOME	0	0.670266	0.9
REACTOME_RNA_POL_III_TRANSCRIPTION	RACTOME	0	0.66152	0.9
REACTOME_DESTABILIZATION_OF_MRNA_BY_TRISTETRAPROLIN_TTP	RACTOME	0	0.649968	0.9
REACTOME_RNA_POL_III_TRANSCRIPTION_INITIATION_FROM_TYPE_3_PROMOTER	RACTOME	0	0.672314	0.9
REACTOME_REGULATORY_RNA_PATHWAYS	RACTOME	0	0.610546	1
REACTOME_DNA_REPAIR	RACTOME	0	0.580985	1
REACTOME_HOST_INTERACTIONS_OF_HIV_FACTORS	RACTOME	0	0.565755	1
REACTOME_3_UTR_MEDIATED_TRANSLATIONAL_REGULATION	RACTOME	0	0.53744	1
REACTOME_PI_METABOLISM	RACTOME	0	0.519644	1
REACTOME_HIV_INFECTION	RACTOME	0	0.51068	1
REACTOME_INFLUENZA_LIFE_CYCLE	RACTOME	0	0.507785	1
REACTOME_METABOLISM_OF_RNA	RACTOME	0	0.497609	1
REACTOME_APOPTOTIC_EXECUTION_PHASE	RACTOME	0	0.484287	1
REACTOME_ACTIVATION_OF_THE_MRNA_UPON_BINDING_OF_THE_CAP_BINDING_COMPLEX_AND_EIFS_AND_SUBSEQUENT_BINDING_TO_43S	RACTOME	0	0.49682	1
REACTOME_MRNA_SPLICING_MINOR_PATHWAY	RACTOME	0	0.491579	1
REACTOME_TRAF6_MEDIATED_NFKB_ACTIVATION	RACTOME	0	0.456569	1
REACTOME_MICRORNA_MIRNA_BIOGENESIS	RACTOME	0	0.450068	1
REACTOME_CONVERSION_FROM_APC_C_CDC20_TO_APC_C_CDH1_IN_LATE_ANAPHASE	RACTOME	0	0.446576	1
REACTOME_DEADENYLATION_DEPENDENT_MRNA_DECAY	RACTOME	0	0.445389	1
REACTOME_SYNTHESIS_OF_PIPS_AT_THE_PLASMA_MEMBRANE	RACTOME	0	0.477043	1
REACTOME_TRNA_AMINOACYLATION	RACTOME	0	0.471624	1
REACTOME_MITOCHONDRIAL_TRNA_AMINOACYLATION	RACTOME	0	0.475543	1
REACTOME_FORMATION_OF_THE_TERNARY_COMPLEX_AND_SUBSEQUENTLY_THE_43S_COMPLEX	RACTOME	0	0.475314	1
REACTOME_MRNA_SPLICING	RACTOME	0	0.475106	1
REACTOME_MRNA_3_END_PROCESSING	RACTOME	0	0.463368	1
REACTOME_PROCESSING_OF_CAPPED_INTRONLESS_PRE_MRNA	RACTOME	0	0.45268	1
REACTOME_DOUBLE_STRAND_BREAK_REPAIR	RACTOME	0	0.448775	1
REACTOME_PROCESSING_OF_CAPPED_INTRON_CONTAINING_PRE_MRNA	RACTOME	0	0.45357	1
REACTOME_MRNA_PROCESSING	RACTOME	0	0.447778	1
REACTOME_INTERACTIONS_OF_VPR_WITH_HOST_CELLULAR_PROTEINS	RACTOME	0	0.442954	1
REACTOME_RNA_POL_II_TRANSCRIPTION	RACTOME	0	0.438164	1
REACTOME_SIGNALING_BY_INSULIN_RECEPTOR	RACTOME	0	0.428166	1
REACTOME_CLEAVAGE_OF_GROWING_TRANSCRIPT_IN_THE_TERMINATION_REGION_	RACTOME	0	0.421779	1
REACTOME_METABOLISM_OF_NON_CODING_RNA	RACTOME	0	0.419229	1
REACTOME_TRANSPORT_OF_MATURE_TRANSCRIPT_TO_CYTOPLASM	RACTOME	0	0.4197	1
REACTOME_CYTOSOLIC_TRNA_AMINOACYLATION	RACTOME	0	0.422338	1
REACTOME_TRANSPORT_OF_MATURE_MRNA_DERIVED_FROM_AN_INTRONLESS_TRANSCRIPT	RACTOME	0	0.422246	1
REACTOME_REGULATION_OF_GLUCOKINASE_BY_GLUCOKINASE_REGULATORY_PROTEIN	RACTOME	0	0.422445	1
REACTOME_TRANSPORT_OF_RIBONUCLEOPROTEINS_INTO_THE_HOST_NUCLEUS	RACTOME	0	0.453631	1
REACTOME_NEP_NS2_INTERACTS_WITH_THE_CELLULAR_EXPORT_MACHINERY	RACTOME	0	0.450556	1
REACTOME_ASSOCIATION_OF_TRIC_CCT_WITH_TARGET_PROTEINS_DURING_BIOSYNTHESIS	RACTOME	0	0.44448	1
REACTOME_G0_AND_EARLY_G1	RACTOME	0	0.466295	1
REACTOME_METAL_ION_SLC_TRANSPORTERS	RACTOME	0	0.48241	1
